1 **Complete single neuron reconstruction reveals morphological diversity in molecularly**  
2 **defined claustral and cortical neuron types**

3

4 Yun Wang<sup>1</sup>, Peng Xie<sup>1</sup>, Hui Gong<sup>2,3</sup>, Zhi Zhou<sup>1</sup>, Xiuli Kuang<sup>4</sup>, Yimin Wang<sup>5,6</sup>, An-an Li<sup>2,3</sup>,  
5 Yaoyao Li<sup>4</sup>, Lijuan Liu<sup>6</sup>, Matthew B. Veldman<sup>7</sup>, Tanya L. Daigle<sup>1</sup>, Karla E. Hirokawa<sup>1</sup>, Lei  
6 Qu<sup>8,6</sup>, Phil Lesnar<sup>1</sup>, Shengdian Jiang<sup>6</sup>, Yang Yu<sup>1</sup>, Wayne Wakeman<sup>1</sup>, Shaoqun Zeng<sup>2</sup>, Xiangning  
7 Li<sup>2,3</sup>, Jing Yuan<sup>2,3</sup>, Thuc Nghi Nguyen<sup>1</sup>, Rachael Larsen<sup>1</sup>, Sara Kebede<sup>1</sup>, Yuanyuan Song<sup>6</sup>, Lulu  
8 Yin<sup>6</sup>, Sujun Zhao<sup>6</sup>, Aaron Feiner<sup>1</sup>, Elise Shen<sup>1</sup>, Chris Hill<sup>1</sup>, Quanxin Wang<sup>1</sup>, Stephanie Mok<sup>1</sup>,  
9 Susan M. Sunkin<sup>1</sup>, Z. Josh Huang<sup>9</sup>, Luke Esposito<sup>1</sup>, Zizhen Yao<sup>1</sup>, Michael J. Hawrylycz<sup>1</sup>,  
10 Bosiljka Tasic<sup>1</sup>, Lydia Ng<sup>1</sup>, Staci A. Sorensen<sup>1</sup>, X. William Yang<sup>7</sup>, Julie A. Harris<sup>1</sup>, Christof  
11 Koch<sup>1</sup>, Qingming Luo<sup>2</sup>, Hanchuan Peng<sup>1</sup>, Hongkui Zeng<sup>1,\*</sup>

12

13 <sup>1</sup>Allen Institute for Brain Science, Seattle, WA 98109, USA.

14 <sup>2</sup>Britton Chance Center for Biomedical Photonics, Wuhan National Lab for Optoelectronics,  
15 Huazhong University of Science and Technology, Wuhan, Hubei, China.

16 <sup>3</sup>HUST-Suzhou Institute for Brainsmatics, JITRI Institute for Brainsmatics, Suzhou, Jiangsu,  
17 China.

18 <sup>4</sup>School of Optometry and Ophthalmology, Wenzhou Medical University, Wenzhou, Zhejiang,  
19 China.

20 <sup>5</sup>School of Computer Engineering and Science, Shanghai University, Shanghai, China.

21 <sup>6</sup>Institute for Brain and Intelligence, Southeast University, Nanjing, Jiangsu, China.

22 <sup>7</sup>Center for Neurobehavioral Genetics, Jane and Terry Semel Institute for Neuroscience and  
23 Human Behavior; Department of Psychiatry and Biobehavioral Sciences, David Geffen School  
24 of Medicine, University of California, Los Angeles, Los Angeles, CA, USA.

25 <sup>8</sup>Key Laboratory of Intelligent Computation & Signal Processing, Ministry of Education, Anhui  
26 University, Hefei, Anhui, China.

27 <sup>9</sup>Cold Spring Harbor Laboratory, Cold Spring Harbor, NY, USA

28

29 \*Lead Contact and Correspondence: [hongkuiz@alleninstitute.org](mailto:hongkuiz@alleninstitute.org)

30

31 **SUMMARY**

32

33 Ever since the seminal findings of Ramon y Cajal, dendritic and axonal morphology has been  
34 recognized as a defining feature of neuronal types and their connectivity. Yet our knowledge  
35 about the diversity of neuronal morphology, in particular its distant axonal projections, is still  
36 extremely limited. To systematically obtain single neuron full morphology on a brain-wide scale  
37 in mice, we established a pipeline that encompasses five major components: sparse labeling,  
38 whole-brain imaging, reconstruction, registration, and classification. We achieved sparse, robust  
39 and consistent fluorescent labeling of a wide range of neuronal types across the mouse brain in  
40 an efficient way by combining transgenic or viral Cre delivery with novel transgenic reporter  
41 lines, and generated a large set of high-resolution whole-brain fluorescent imaging datasets  
42 containing thousands of reconstructable neurons using the fluorescence micro-optical sectioning  
43 tomography (fMOST) system. We developed a set of software tools based on the visualization  
44 and analysis suite, Vaa3D, for large-volume image data processing and computation-assisted  
45 morphological reconstruction. In a proof-of-principle case, we reconstructed full morphologies  
46 of 96 neurons from the claustrum and cortex that belong to a single transcriptomically-defined  
47 neuronal subclass. We developed a data-driven clustering approach to classify them into multiple  
48 morphological and projection types, suggesting that these neurons work in a targeted and  
49 coordinated manner to process cortical information. Imaging data and the new computational  
50 reconstruction tools are publicly available to enable community-based efforts towards large-scale  
51 full morphology reconstruction of neurons throughout the entire mouse brain.

52

53

## 54 INTRODUCTION

55 Like discovering the periodic table of elements in chemistry, and a taxonomy of living species in  
56 biology, obtaining an atlas of cell types is fundamental to neuroscience, essential for the  
57 understanding of brain function and its dysfunction in diseases. Brain cells, especially neurons,  
58 exhibit tremendous diversity across molecular, morphological, physiological, connectional and  
59 functional levels. A proper form of classification and creation of a cell type atlas needs to  
60 consider and integrate all these distinct cellular properties, obtained from thousands to millions  
61 of single cells in a systematic, consistent and comprehensive manner (Zeng and Sanes, 2017).  
62 Recent advances in high-throughput single cell RNA-sequencing have enabled systematic  
63 classification of cell types at the transcriptomic level (Saunders et al., 2018; Tasic et al., 2016;  
64 Tasic et al., 2018; Zeisel et al., 2018; Zeisel et al., 2015). This approach captures the essence of  
65 major cell types with known anatomical and functional properties, and reveals many new  
66 potential cell types. Systematic classification of cortical neurons at a combined morpho-electrical  
67 level has also been carried out (Jiang et al., 2015; Markram et al., 2015), and new technologies  
68 have been developed to correlate morpho-electrical and transcriptomic cell types (Cadwell et al.,  
69 2016; Fuzik et al., 2016).

70 Ramon y Cajal's foundational work revealed the extraordinary diversity of dendritic and axonal  
71 structures of neurons across brain regions and species using the Golgi technique, leading to the  
72 concept of neuronal types (Ramón y Cajal, 1909). Dendritic and axonal morphologies have long  
73 been held as the most defining features of neuronal types. Brain-wide inter-areal connectivity has  
74 been mapped extensively using bulk injections of anterograde and retrograde tracers to label  
75 populations of projection neurons (Gamanut et al., 2018; Oh et al., 2014; Zingg et al., 2014;  
76 Harris et al., bioRxiv preprint <https://www.biorxiv.org/content/10.1101/292961v2>, 2018).  
77 However, it remains largely unknown how population-level projection patterns are reflected at  
78 the single neuron level. Retrograde tracing studies suggest that individual neurons within a brain  
79 region often have heterogeneous axonal projection patterns, likely carrying diverse messages in  
80 the behaving brain (Minciacchi et al., 1985; Zingg et al., 2018). Thus, characterizing single  
81 neuron axonal projections through reconstruction of complete morphologies will provide critical  
82 information about how neural signals are organized and transmitted to their target regions. This  
83 knowledge is a critical component of any complete description of neuronal cell types.

84 Despite its importance, information about axonal morphologies is currently lacking for most  
85 projection neuron types in mammals, whose axons often cover large distances and are severed in  
86 studies based on *ex vivo* brain slices. Efforts have been made to fully label single neurons with  
87 small molecules or fluorescent proteins through *in vivo* whole-cell patching, *in vivo*  
88 electroporation (Han et al., 2018; Li et al., 2017), or sparse viral labeling with sindbis virus  
89 (Aransay et al., 2015; Ghosh et al., 2011) or adeno-associated virus (AAV) (Economio et al.,  
90 2016; Lin et al., 2018a; Lin et al., 2018b). This is conventionally followed by serial sectioning  
91 and imaging of each section, and manual reconstruction of the labeled neurons across many brain  
92 sections. Although relatively few such studies exist to date due to the highly laborious process,  
93 these studies reveal unique and novel features of specific projection neuron types that likely have  
94 important functional implications (Economio et al., 2018; Kita and Kita, 2012). The recent  
95 development of high-throughput and high-resolution fluorescent imaging platforms, such as  
96 fMOST (Gong et al., 2016) and MouseLight (Economio et al., 2016), coupled with more efficient  
97 sparse viral labeling strategies, are now enabling large-scale generation of neuronal morphology  
98 datasets. These studies also reveal a continued need for further improvements in tools for

99 generating very sparse and strong labeling of single neurons at a brain-wide scale, as well as  
100 computational tools to expedite the laborious reconstruction process.

101 For our case study, we chose to reconstruct full morphologies of claustrum projection neurons  
102 and their close relatives in the cortex. The claustrum is a small, elongated structure in the cortical  
103 subplate, located medial to and beneath lateral cortical areas (*e.g.*, agranular insular cortex), just  
104 outside the striatum. It has widespread reciprocal connections with nearly all isocortical and  
105 retrohippocampal areas, with particularly strong and bilateral connections with the prefrontal  
106 cortex (including anterior cingulate, prelimbic, infralimbic, orbitofrontal and agranular insular  
107 areas) and the posterior lateral cortex (including entorhinal, perirhinal, and lateral higher visual  
108 areas) (Wang et al., 2017; Zingg et al., 2018). Based largely on connective evidence, it was  
109 postulated that the claustrum could play important roles in multimodal integration of stimulus  
110 information into a single conscious percept (Crick and Koch, 2005), amplification of cortical  
111 oscillations (Smythies et al., 2012, 2014), salience and novelty detection (Remedios et al., 2010,  
112 2014), selective attention (Goll et al., 2015; Mathur, 2014), and regulation of vigilance states. A  
113 triptych of *in vivo* and *in vitro* studies in mice support the role of the claustrum in the inhibitory  
114 control of relevant cortical excitatory neurons during attentional control (Atlan et al., 2018;  
115 Jackson et al., 2018; Narikiyo et al, bioRxiv preprint  
116 <https://www.biorxiv.org/content/10.1101/286773v1>, 2018). Recently, a patch-clamp  
117 electrophysiological study identified two spiny projection neuron subtypes and three aspiny  
118 interneuron subtypes in the claustrum, and found that visual cortex, parietal association cortex,  
119 and anterior cingulate cortex receive input from the two types of projection neurons in differing  
120 proportions (White and Mathur, 2018). Gene expression studies suggest that claustrum  
121 projection neurons bear molecular resemblance to endopiriform nucleus neurons and a group of  
122 neurons present in multiple lateral cortical areas, sharing a number of common marker genes  
123 (Smith et al., 2018). To better understand the role of the claustrum in regulating cortical function,  
124 it is necessary to study the morphology and projection pattern of individual claustrum neurons,  
125 and understand how they specifically and cooperatively cover the cortical mantle and their  
126 relationship with molecular profiles.

127 We established a systematic pipeline that allows us to label, image, reconstruct and classify  
128 single neurons on a brain-wide scale using complete morphology data. Since this remains a  
129 highly challenging task for any single group, we make all the imaging data and computational  
130 reconstruction tools publicly available. We aim to enable a community-based effort to generate a  
131 sufficiently large number, *e.g.*, tens to hundreds of thousands or millions, of full neuronal  
132 morphology reconstructions throughout the mouse brain, to facilitate meaningful cell type  
133 classification using soma locations, dendrites, and local and long-distance axon morphological  
134 features and gain a comprehensive understanding of cell type diversity. Here, we demonstrate  
135 proof of principle for this pipeline by reconstructing and classifying full morphologies of 96  
136 neurons from the claustrum and cortex. Even with this relatively small set of full reconstructions,  
137 we uncovered surprising and striking morphological diversity within the relatively homogeneous  
138 molecularly-defined claustral and cortical cell subclass. This intriguing result lends support for  
139 the need to approach the cell type classification problem from different perspectives, reconciling  
140 and integrating multi-modal information for a unified understanding of cell type.

141

142 **RESULTS**

143

## 144 **Sparse, robust and consistent neuronal labeling**

145 Previous genetic approaches to achieve sparse or single neuron labeling include viral delivery  
146 (*e.g.*, using sindbis virus or AAV) and *in vivo* electroporation (Aransay et al., 2015; Economo et  
147 al., 2016; Han et al., 2018; Li et al., 2017; Lin et al., 2018a; Lin et al., 2018b). Both approaches  
148 have substantial cell-to-cell and animal-to-animal variations, and are usually restricted to few  
149 brain regions. To achieve more efficient, widespread and consistently sparse yet strong labeling,  
150 we utilized TIGRE2.0 transgenic reporter lines shown to exhibit viral-like transgene expression  
151 levels (Daigle et al., 2018), coupling them with Cre expression from either Cre driver lines or  
152 viral Cre delivery. Two general strategies were employed. The first was to use the GFP  
153 expressing Ai139 or Ai140 reporter line in conjunction with sparse Cre-mediated recombination  
154 (**Fig. 1A**). We used CreERT2 driver lines, and titrated the level of CreERT2-mediated  
155 recombination using low-dose tamoxifen induction (**Table S1**). We found optimal doses for  
156 sparse labeling in each case by screening for expression using serial two photon tomography  
157 (STPT) (**Fig. 1C-E**). Alternatively, to achieve brain-wide sparse labeling, we delivered pSyn-Cre  
158 via retroorbital injection of diluted AAV with the PHP.eB serotype (Chan et al., 2017) (**Fig. 1C**).  
159 We further tested a combination of TIGRE2.0 (Ai140) and TIGRE1.0 (Ai82) reporter lines,  
160 using the tTA2 from a single TIGRE2.0 allele to drive two copies of TRE promoter driven GFP  
161 expression cassettes (**Fig. 1A**). We found that this strategy generates even higher level of GFP  
162 expression, well suited for fMOST imaging (see below).

163 The second strategy was to use a new TIGRE2.0 line, TIGRE-MORF (also named Ai166;  
164 Veldman et al, in submission), which is sparsely activated in conjunction with Cre delivery (**Fig.**  
165 **1B**). TIGRE-MORF/Ai166 expresses the MORF gene, which is composed of a farnesylated  
166 EGFP (GFPf) preceded by a mononucleotide repeat of 22 guanines (G<sub>22</sub>-GFPf; Veldman et al, in  
167 submission). The GFPf transgene is not translated at the baseline due to the out-of-frame of the  
168 G<sub>22</sub> repeat relative to the open reading frame of GFPf, which lacks its own translation start  
169 codon. However, during DNA replication or repair, rare events of stochastic frameshift of the  
170 mononucleotide repeat could result in correction of the translation frame (*e.g.*, G<sub>22</sub> to G<sub>21</sub>) and  
171 expression of the GFPf protein in a small subset of the progeny cells. In our companion study  
172 (Veldman et al, in submission), TIGRE-MORF and three other MORF mouse lines all exhibit a  
173 labeling frequency of 1-5% when they are crossed to different Cre mouse lines. Even with this  
174 frequency, we found that combining TIGRE-MORF/Ai166 with many Cre driver lines densely  
175 expressing the Cre transgene did not produce sufficient sparsity to readily untangle the axonal  
176 ramifications, whereas combining it with Cre lines that are already relatively sparse to begin  
177 with, or with CreERT2 lines with intermediate dosing level of tamoxifen (**Table S1**), did lead to  
178 extremely sparse labeling that is well suited for reconstruction of even very elaborate axonal  
179 arborizations of many neuronal types (**Fig. 1F-L**). The use of membrane associated GFPf also  
180 enabled robust labeling of very thin axon fibers. Leaky background expression of GFP reported  
181 in other TIGRE2.0 lines (Daigle et al., 2018) is not present in TIGRE-MORF/Ai166 mice due to  
182 the strict dependency of translational frameshift for the expression of GFPf reporter, making  
183 TIGRE-MORF/Ai166 (below simplified as Ai166) an ideal reporter line for sparse and strong  
184 labeling of various neuronal types across the brain.

185

## 186 **fMOST imaging**

187 We acquired whole brain images with sufficient resolution ( $\sim 0.3 \times 0.3 \times 1 \mu\text{m XYZ}$ ) for  
188 reconstructing fine-caliber axons, using fluorescence micro-optical sectioning tomography  
189 (fMOST), a high-throughput, high-resolution, brain-wide fluorescent imaging platform. In this  
190 approach, a GFP-labeled brain is first embedded in resin. The resin-embedded GFP fluorescence  
191 can be recovered through chemical reactivation (Xiong et al., 2014) provided by adding  $\text{Na}_2\text{CO}_3$   
192 in the imaging water bath. Thus, a wide-field block-face imaging system can be employed to  
193 maximize imaging speed. Following imaging of the entire block-face, the top  $1\text{-}\mu\text{m}$  tissue is  
194 sliced off by a diamond knife, exposing the next face of the block for imaging. For the entire  
195 mouse brain, a 15-20 TB dataset containing  $\sim 10,000$  coronal planes of  $0.2\text{-}0.3 \mu\text{m X-Y}$   
196 resolution and  $1 \mu\text{m Z}$  sampling rate is generated.

197 So far we have generated  $>46$  high-quality fMOST datasets for a number of cortical, thalamic,  
198 claustral, striatal, cholinergic, noradrenergic and serotonergic neuronal types (**Table S1**). It is  
199 worth noting that this approach can be extended to any other cell types for which appropriate  
200 Cre-dependent labeling methods are available, and we continue to test new Cre lines and other  
201 sparse Cre delivery approaches to generate novel fMOST datasets. **Figure 2** shows  
202 representative images acquired using fMOST for a wide variety of neuronal types and their  
203 dendritic and axonal arborizations, visualized using  $100\text{-}\mu\text{m}$  maximum intensity projection  
204 (MIP) images (i.e., projected from 100 consecutive image planes) (for more examples see **Fig.**  
205 **S1**). In the cortex, we imaged neurons suitable for single cell reconstructions from different  
206 excitatory projection classes (Tasic et al., 2018). For example, *Cux2-CreERT2;Ai166* labeled the  
207 cortical L2/3/4 intratelencephalic (IT) subclasses of excitatory neurons (**Fig. 2A** and **Movie S1**).  
208 *Plxnd1-CreER;Ai166* labeled the cortical L2/3 and L5 IT subclasses, as well as striatal medium  
209 spiny neurons (**Fig. 2C** and **Movie S2**). *Fezf2-CreER;Ai166* labeled the cortical L5 pyramidal  
210 tract (PT) subclass (**Fig. 2B** and **Movie S3**). *Nxph4-T2A-CreERT2;Ai166* labeled the cortical  
211 L6b subplate neurons (**Fig. S1A**). We also labeled and imaged cells from the cortical *Pvalb+*  
212 subclass of inhibitory interneurons, in addition to a subset of L5 PT excitatory neurons, using  
213 *Pvalb-T2A-CreERT2;Ai166* (**Fig. 2G** and **Movie S4**), and the *Sst+* subclass of interneurons  
214 using *Sst-Cre;Ai166* (**Fig. S1B**). *Gnb4-IRES2-CreERT2;Ai140;Ai82* labeled the *Car3+* IT  
215 subclass of claustral and cortical excitatory neurons (**Fig. 2D** and **Movie S5**, also see below).  
216 Several cell types containing neuromodulators were also labeled and imaged, including  
217 noradrenergic neurons in the locus ceruleus using *Dbh-Cre\_KH212;Ai166* (**Fig. 2E**), and  
218 serotonergic neurons in the dorsal raphe and brainstem using *Slc6a4-CreERT2;Ai166* (**Fig. 2F**  
219 and **Movie S6**). *Tnnt1-IRES2-CreERT2;Ai140;Ai82* labeled thalamic excitatory projection  
220 neurons as well as striatal medium spiny neurons (**Fig. 2H** and **Movie S7**). *Vipr2-IRES2-Cre-*  
221 *neo;Ai166* also labeled thalamic excitatory projection neurons but with an enrichment in the  
222 visual thalamic nucleus, the dorsal lateral geniculate nucleus (LGd), as well as retinal ganglion  
223 cells and cortical chandelier cells (**Fig. 2I** and **Movie S8**). Many of these Cre lines also sparsely  
224 label other populations of neurons in other parts of the brain, which are not described in detail  
225 here.

226 Each of these brains contains  $\sim 100\text{-}1,000$  labeled neurons (**Table S1**). Thus, overall, tens of  
227 thousands of neurons could be reconstructed from these and additional datasets in the coming  
228 years. These datasets are already, or will be made, publicly available under the BRAIN Initiative  
229 Cell Census effort (<https://biccn.org/>) as a unique resource for the community.

230 Even without reconstruction, it is apparent that these neurons display a remarkable array of  
231 dendritic and axonal morphologies. Traditionally, it has been a well-known technical challenge

232 to fully visualize very fine axon fibers. But in each example case shown here, the axonal labeling  
233 appears to be complete as judged by the visibility of a terminal bouton at the end of each axon  
234 fiber (see arrowheads in **Fig. 2**). We assess each image series and cell to make sure the labeling  
235 fills all the way to an identifiable end. If it doesn't, we don't consider it complete. Specifically,  
236 in these sparsely labeled brains, cortical IT and PT neurons not only have main long-range  
237 projections but also local axonal branches that are well segregated and clearly identifiable,  
238 enabling truly complete reconstruction of the entire local and long-range, cortical and subcortical  
239 axonal arborization (**Fig. 2A-C**). L5 PT neurons form the 'driving' type of synapses in the  
240 thalamus (Guo et al., 2017; Sherman, 2016), which can be seen as enlarged and intensely  
241 fluorescent boutons (**Fig. 2G**). L6b subplate neurons extend their axons upwards into layer 1  
242 (**Fig. S1A**). The axons of thalamic projection neurons form dense or dispersed clusters in the  
243 cortex (**Fig. 2H-I**). On the other hand, claustral, noradrenergic and serotonergic neurons have  
244 widely dispersed, thin axons that are still labeled well (**Fig. 2D-F**). One can also clearly see  
245 individual axons in substantia nigra from striatal medium spiny neurons (**Fig. 2C,H**), individual  
246 axon terminal clusters in superior colliculus likely from retinal ganglion cells (**Fig. 2I**), as well as  
247 the very dense and fine local axonal branches of a variety of cortical and striatal interneurons  
248 (*e.g.*, basket cells, chandelier cells, and Martinotti cells) (**Fig. 2G,I and S1B**). The consistency  
249 and high quality of brain-wide labeling and imaging demonstrates the wide applicability of our  
250 approach in studying morphologies of diverse neuronal types throughout the brain.

251

## 252 **Pipeline for image data processing, morphology reconstruction and registration**

253 We established a standardized image data processing and whole mouse brain morphology  
254 reconstruction process (**Fig. 3**), utilizing Vaa3D, an open-source, cross-platform visualization  
255 and analysis system (Peng et al., 2010). Each fMOST dataset is first converted to a multi-level  
256 navigatable dataset using the Vaa3D-TeraFly program (Bria et al., 2016), which allows smooth  
257 handling of terabyte-scale datasets. Morphology reconstruction is then carried out on the TeraFly  
258 files within Vaa3D. A series of tools were developed within Vaa3D to facilitate semi-automated  
259 and manual reconstruction, as well as brain registration and analysis. In particular, a virtual  
260 reality (VR) environment created within Vaa3D, named TeraVR, significantly enhanced the  
261 manual reconstructor's ability to see the 3D relationships among intertwined axonal segments,  
262 and thus improved the precision and efficiency of morphology reconstruction (Wang et al.,  
263 bioRxiv preprint <https://doi.org/10.1101/621011>, 2018). To produce an accurate reconstruction  
264 of a neuron, TeraVR enabled several annotators working collaboratively on the same neuron to  
265 discuss around uncertain structures. After completion of the quality control (QC) check and  
266 manual correction, Auto-Refinement fitted the tracing to the center of fluorescent signals and  
267 filled any pixel gaps as the last step of reconstruction. The final reconstructed morphology was  
268 completed as a single tree without breaks, loops, multiple branches from the same point, etc.

269 In parallel, each fMOST dataset was registered to the 3D Allen mouse brain reference atlas, the  
270 Common Coordinate Framework (CCFv3, <http://atlas.brain-map.org/>), using a process  
271 specifically designed for fMOST datasets (**Fig. S2**) to handle the challenges of brain shrinkage  
272 and deformation after fixative perfusion and resin embedding, and stripe artifacts due to diamond  
273 knife cutting. Following the registration of the whole-brain fluorescent image dataset, all the  
274 individual reconstructions from the brain were also registered to the CCF. The registration  
275 enables digital anatomical delineation and spatial quantification of each reconstructed  
276 morphology and its compartments (*e.g.*, soma, dendrites, axon arbors). Co-registration of

277 multiple brains into the common 3D space allows analysis and comparison of morphological  
278 features of neurons across different brains.

279

## 280 **Reconstruction and classification of *Gnb4*<sup>+</sup> claustral and cortical neurons**

281 As a proof of principle, we first studied the morphological diversity of neurons labeled in the  
282 *Gnb4*-IRES2-CreERT2 line. *Gnb4* is a marker gene that selectively labels neurons in the  
283 claustrum, endopiriform nucleus, and a population of neurons in the deep layers of lateral  
284 cortical areas (Wang et al., 2017) (**Fig. S3**). Previous population-level axonal projection mapping  
285 showed that claustrum neurons predominantly target, and have extensive reciprocal connections  
286 with, neocortical and allocortical areas, with particularly strong interconnections with prefrontal  
287 and retrohippocampal cortical areas (Wang et al., 2017). We first confirmed that *Gnb4*-IRES-Cre  
288 labeled cells in the claustrum have this same widespread cortical projection pattern, including  
289 preferential targeting to prefrontal and medial cortical areas, using bulk labeling with the Cre-  
290 dependent AAV2/1-pCAG-FLEX-GFP tracer (**Fig. 4A-B**). *Gnb4*<sup>+</sup> cortical neurons were mapped  
291 exclusively to the previously described (Tasic et al., 2018) L6 IT Car3 subclass of cortical  
292 excitatory neurons by single-cell transcriptomics (see next section below). Similar projection  
293 experiments with the same AAV tracer injected in lateral cortical areas (primary or secondary  
294 somatosensory cortex) in *Gnb4*-IRES2-CreERT2 mice, which labeled axons from deep L6  
295 neurons, also showed intracortical projections, but with a more restricted, distinct set of targets  
296 compared to claustrum projections (**Fig. 4C-E**). Note that these 5 selected datasets all had small,  
297 spatially specific, injection sites that were located very close to each other. These small bulk  
298 injections demonstrate very distinct projection patterns between claustral and cortical *Gnb4*<sup>+</sup>  
299 neurons.

300 To sparsely label claustral and cortical projection neurons, we generated 4 fMOST datasets using  
301 the *Gnb4*-IRES2-CreERT2 line crossed with Ai139 (#236174), Ai140 (#17109), and Ai82;Ai140  
302 (#17781 and 17782) (**Fig. 5A** and **Table S1**). From these 4 brains, we reconstructed 34 claustrum  
303 (CLA) projection neurons and 62 cortical neurons (**Table S2**). For most cells, distinguishing  
304 CLA and cortical neurons was relatively easy using soma locations. We assigned CLA cell  
305 identity based on their soma locations within the claustrum region, whereas the *Gnb4*<sup>+</sup> pyramidal  
306 cells (PCs) were found in various cortical regions, largely all in deep layer 6 (“L6PCs”).  
307 Following registration to the CCF, the location and spatial distribution of each reconstructed  
308 neuron and its dendritic and axonal arbors could be visualized in the 3D reference atlas space.  
309 The somata of these neurons spanned the entire 3.2-mm anteroposterior extent of claustrum and  
310 a much larger range of lateral cortical areas (**Fig. 5A**). The full axonal morphology of each  
311 reconstructed neuron is shown in **Figure S4** for CLA cells and **Figure S5** for L6PCs. It is  
312 important to note that all these neurons projected exclusively into the cortex. None had axon  
313 projections into the striatum, demonstrating a major difference between these *Gnb4*<sup>+</sup> claustral  
314 and cortical neurons and other types of corticocortical IT neurons which also have axon  
315 collaterals projecting to the striatum (Harris and Shepherd, 2015).

316 The dendrites of CLA cells and L6PCs were visually and quantitatively distinguishable from  
317 each other based on several features (**Fig. 5B**). The dendrites of CLA cells were very flat, with  
318 more extended processes along the anteroposterior axis and the thinnest dimension in the  
319 mediolateral axis, in keeping with the shape of claustrum and embedded in the axon bundle of  
320 CLA cells traversing through the claustrum. The dendrites of L6PCs were more extended



321 compared with the CLA dendrites, although they were also relatively flattened at a plane parallel  
322 to the white matter. They rarely had a typical apical dendrite extending vertically towards pia,  
323 rather, their “apical” dendrite as defined by branching at the highest order was often obliquely or  
324 horizontally oriented, parallel to the white matter. In addition, the L6PCs often had a big basal  
325 dendrite, resembling the bitufted PCs in layer 6a, a pyramidal cell type having claustral  
326 projections (Wang et al., 2018; Zhang and Deschenes, 1997). Quantitative analyses of dendritic  
327 features confirmed that L6PCs had significantly greater depth and depth-to-width ratio, but  
328 smaller number of branches, compared to CLA cells (**Fig. 5B** and **Table S3**).

329 The axons of CLA cells and L6PCs also had distinct features both globally and locally (**Fig. 5C**,  
330 **S4**, **S5** and **Table S3**). Quantitative analyses of the entire axonal arbors showed that CLA cells  
331 had significantly greater scale (width and height), Euclidean distance and path distance to soma.  
332 The axons of CLA cells emerged from the somata with no or only a couple of local collaterals,  
333 and typically bifurcated proximally into a few major, thick axon stems which often projected in  
334 opposite directions (forward and backward) and traveled through the claustrum in parallel to the  
335 white matter. On the other hand, L6PCs had significantly more elaborate local axon branches  
336 forming a cluster around the soma, and projected to one or multiple target cortical areas. The  
337 differences in both dendritic and axonal morphologies suggest that the claustral and cortical  
338 *Gnb4+* neurons are distinct.

339 We first classified cells based on expert manual annotation of axonal projection patterns (**Fig. 6**).  
340 The CLA neurons can be classified into a total of 4 types, including 2 major types and 2 subtypes  
341 within each major type (**Fig. 6A**). CLA type I cells (CLA\_I) preferentially project to midline  
342 cortical areas. CLA type II cells (CLA\_II) have distal, lateral cortical projections, avoiding the  
343 midline cortical areas. Within each major type, neurons were grouped into an ipsilateral-only  
344 projecting subtype (CLA\_I-ipsi and CLA\_II-ipsi) and a bilateral projecting (to both ipsilateral  
345 and contralateral hemispheres) subtype (CLA\_I-bi and CLA\_II-bi). Most of the reconstructed  
346 CLA cells belonged to the CLA\_I types. CLA\_II-bi appeared to be rare among different CLA  
347 types.

348 We also observed that projection patterns were topographically organized from anterior to  
349 posterior claustrum within individual types (**Fig. 6C**). The somata of CLA\_I-ipsi cells were  
350 distributed through the full length of the claustrum, while those of other types were located  
351 mostly at the anterior and middle parts of the claustrum. The CLA\_I-ipsi cells located in the  
352 anterior claustrum typically extended their axons from anterior to posterior midline cortical  
353 areas. The CLA\_I-ipsi cells located in the middle claustrum typically formed a tighter axon  
354 cluster only in the anterior half of midline cortical areas, with an intense innervation to the  
355 prelimbic (PL) and frontal pole (FRP) areas. They also more frequently projected backward to  
356 entorhinal (ENT) and perirhinal (PERI) areas forming an axon cluster there. Remarkably,  
357 individual axons of the CLA\_I-ipsi cells located in the posterior claustrum were found to wrap  
358 around the entire ipsilateral cortex (not forming a loop though), and hence named “crown of  
359 thorns” neurons. Those cells often formed axon clusters in ENT, PL and visual cortical areas in  
360 addition to a cluster in the midline of cortex. CLA\_I-bi cells projected bilaterally forming an  
361 axon cluster on each side of the midline cortical areas. Typically, the two axon clusters on two  
362 sides were asymmetrical, predominant in the ipsilateral hemisphere. Those CLA\_I-bi cells  
363 located relatively anteriorly often projected to ENT, PL and somatosensory cortical areas. Those  
364 from more middle locations had asymmetrical axon clusters along midline of both hemispheres  
365 but limited projections to other cortical areas.

366 Similarly, the cortical L6PCs were also manually classified into two types, ipsilateral-only  
367 projecting (PC\_ipsi) and bilateral projecting (PC\_bi) (**Fig. 6B**). The PC\_ipsi type usually had  
368 their axonal projections in different cortical areas (within the same hemisphere) from their soma  
369 location, whereas the PC\_bi type usually had their axonal projections in the homotypic cortical  
370 area on the contralateral hemisphere, forming two largely symmetrical axon clusters on both  
371 sides. For the latter type, occasionally additional projections were formed in other cortical areas  
372 in the ipsilateral hemisphere. Quantitative analysis showed that PC\_ipsi cells had significantly  
373 greater numbers of axon branching nodes, ends, segments, and total length. Thus, compared to  
374 PC\_bi, PC\_ipsi had more complex axonal arborizations. Even though we only manually divided  
375 L6PCs into 2 morphological types, we observed an even greater degree of topographic diversity  
376 of axon projection patterns from anterior to posterior cortical areas for both ipsilateral and  
377 bilateral projecting types (**Fig. 6D**).

378 We next established a data-driven clustering-based morphology classification approach.  
379 Clustering analysis (see **Methods**) was performed using four feature sets: projection pattern  
380 (**Table S4**), soma location (**Table S2**), axon morphology and dendrite morphology (**Table S3**). A  
381 total of 14 morphological clusters were identified, containing 30 CLA and 52 L6PC neurons  
382 (**Fig. 7A,B** and **Fig. S6-S7**). A total of 14 cells were excluded by outlier removal because they  
383 were each morphologically unique to themselves due to the small sample size, see **Methods**. We  
384 found that the segregation of the clusters was mainly driven by their projection targets (**Fig. 7B**  
385 and **S6**). These clusters generally corresponded well with the manually classified morphological  
386 types (**Fig. 7A-C**), and further enabled subdivision of the neurons based on their specific  
387 projection targets (**Fig. 7D-F**). We calculated the total number of projection targets (ipsilateral  
388 and contralateral targets counted separately) contacted by each neuron using two different  
389 thresholds to label a region as “targeted”, a minimum of 1,000  $\mu\text{m}$  of axon length (same as the  
390 threshold used in a previous study, (Han et al., 2018)) or a minimum of 1 axon terminal (a more  
391 stringent threshold to minimize contribution from passing fibers) (**Fig. 7E**). The median total  
392 number of projection targets is 29 or 21 for CLA neurons and 18 or 12 for L6PCs, in either case  
393 substantially greater than that reported previously for primary visual cortex L2/3 IT neurons  
394 (Han et al., 2018).

395 L6PCs were assigned to a larger number of clusters. Clusters 7, 10, 11, 12 and 13 belonged to the  
396 PC-ipsilateral group (**Fig. 7F**). Clusters 5, 6 and 14 belonged to the PC-bilateral group. The  
397 clusters were arranged topographically from anterior to posterior cortex based on both soma  
398 location and projection target specificity, in other words, each cluster contained a group of  
399 neurons that were located close to each other and projected to similar cortical target areas. This is  
400 consistent with the above observation from manual classification even though only two  
401 morphological types were defined manually. Thus, both manual and computational approaches  
402 identify extensive diversity of L6PC neuronal morphologies and projections.

403 Clusters 1, 2, 3 and 8 belonged to the CLA-ipsilateral group, in which cluster 1 was lateral-  
404 projecting and clusters 2, 3 and 8 were midline-projecting (**Fig. 7F**). These computationally  
405 derived clusters also revealed topographical projection patterns consistent with observations  
406 made in the above manual classification. Cluster 4 contained CLA-bilateral midline-projecting  
407 cells. Cluster 9 contained a mixture of CLA cells and L6PCs, as they showed highly similar axon  
408 projection features and soma locations. This cluster had preferential projection to the FRP and  
409 ORBl areas on the ipsilateral side.

410 Taken together, the morphological features of fully reconstructed claustral neurons and L6PCs  
411 suggest that long-range axonal projections vary according to soma locations, indicative of a  
412 topographic organization of structural connectivity networks in claustrum and cortex.

413

### 414 **Classification of *Car3* (*Gnb4+*) subclass of claustral and cortical neurons by single-cell** 415 **RNA-sequencing**

416 We previously established a standardized single-cell RNA-sequencing (scRNA-seq) pipeline  
417 using the SMART-Seq v4 method to profile cells isolated from various brain regions (Tasic et  
418 al., 2018). Here, we analyzed 1062 cells isolated from claustrum and overlying cortical areas of  
419 *Gnb4-IRES2-CreERT2;Ai140* and *Gnb4-IRES2-CreERT2;Ai82;Ai140* mice by fluorescence  
420 activated cell sorting (FACS). We performed a large-scale co-clustering analysis by combining  
421 the scRNA-seq data from these cells and ~74,000 other cortical and hippocampal cells using our  
422 established analysis procedure and criteria (Tasic et al., 2018). Out of ~290 clusters, we found  
423 one major branch at the subclass level that contains nearly all the claustral and cortical neurons  
424 isolated from the *Gnb4-IRES2-CreERT2;Ai140* and *Gnb4-IRES2-CreERT2;Ai82;Ai140* mice  
425 (**Fig. 8A**). This subclass expresses a unique marker gene *Car3* and contains all the cortical  
426 neurons previously identified from our VISp-ALM single-cell transcriptomic study that belonged  
427 to the L6 IT *Car3* subclass of glutamatergic excitatory neurons. In addition, this subclass also  
428 contains neurons from several other lateral cortical areas including agranular insular cortex (AI),  
429 supplementary somatosensory cortex (SSs) and temporal cortex (TEa) that were isolated from  
430 various Cre lines including *Slc7a7-IRES2-Cre*, *Cux2-CreERT2* and *Esr2-IRES2-Cre*. Since this  
431 subclass contains both cortical and claustral neurons, we now rename it as the *Car3* subclass  
432 (dropping the specific reference to cortical L6 and IT in (Tasic et al., 2018)).

433 This *Car3* subclass branch (total 1,997 cells) consists of one major cluster that contains 1,206  
434 cells from both claustrum and cortex, plus six additional minor clusters (15-236 cells each) (**Fig.**  
435 **8A**). As shown in the tSNE plot (**Fig. 8A** lower right panel), the claustral and cortical neurons  
436 are intermingled together in the major cluster, whereas one of the minor clusters, *Car3* TEa-  
437 PERI-ECT\_GU Hgf, contains mostly cells from TEa. The co-clustering of claustral and cortical  
438 *Car3+* *Gnb4+* neurons suggests that they are highly related to each other, possibly reflecting a  
439 common developmental origin.

440 In an attempt to link molecular identities with the morphological diversity described above, we  
441 performed Retro-seq (Tasic et al., 2018) on cells isolated from claustrum and several cortical  
442 areas (*i.e.*, SSs, VISp, AI and TEa) that were labeled by retrograde tracers injected into medial  
443 (*e.g.*, anterior cingulate area, ACA) or lateral cortical areas (*e.g.*, lateral orbital area, ORBl, or  
444 posterolateral visual area, VISpl). Cells were isolated from both hemispheres – ipsilateral or  
445 contralateral to the injection site. These Retro-seq cells were included in the above large-scale  
446 clustering analysis together with all other cells.

447 To try to better resolve subtle differences between cells with different projectional and  
448 morphological properties and thus uncover potential molecular correlates of the morphological  
449 diversity, we then re-clustered the *Car3* subclass cells (1,997 cells total, 298 of which from  
450 Retro-seq, all cells contributing to this clustering analysis are described in **Table S5**) with a more  
451 relaxed statistical criterion (see **Methods**). This approach resulted in 19 clusters that belonged to  
452 5 main branches (**Fig. 8B**). As seen in the cell distribution across different areas below the  
453 dendrogram and in the tSNE plots (**Fig. 8B,C**), these clusters were quite continuous. There was

454 no clear separation between CLA and cortical Car3 neurons. There was even a certain degree of  
455 segregation driven by Cre driver lines (*i.e.*, cells isolated from the same regions but different Cre  
456 lines were segregated by Cre lines, **Fig. 8B** rightmost panel in comparison with **Fig. 8C** leftmost  
457 panel). Thus, we intentionally reached a level of cluster resolution high enough to even detect  
458 technical variations in order to search for gene expression correlates of morphological diversity.

459 We then focused on the cluster distribution of Car3 Retro-seq cells. We found that, even under  
460 such relaxed clustering conditions, CLA and cortical cells projecting to various cortical areas,  
461 ACA, ORBl or VISpl, were located closely together with no clear segregation (**Fig. 8C** middle  
462 panel). Furthermore, even though there were only a few Car3 Retro-seq cells (14 cells) isolated  
463 from the contralateral side of the tracer injection sites, they were completely intermingled with  
464 Car3 Retro-seq cells isolated from the ipsilateral side (284 cells) of the injection sites (**Fig. 8C**  
465 right panel), suggesting that ipsilateral- and bilateral-projecting cells were also molecularly  
466 indistinguishable using the current criteria.

467 Thus, our study reveals striking morphological diversity within the molecularly defined cortical  
468 and claustral Car3 (and *Gnb4+*) cell class/type.

469

## 470 **DISCUSSION**

471

472 To fully understand the morphological and projectional specificity of neurons across the brain, it  
473 is generally expected that a large number, likely in the range of hundreds of thousands to  
474 millions, of neurons will need to be examined. Approaches such as MAPseq (Kebschull et al.,  
475 2016) can be used to quickly survey projection specificity at the regional level for many neurons  
476 in a high throughput manner. However, many essential details can only be obtained through full  
477 morphological reconstruction. Collecting such ground truth data will provide an invaluable  
478 opportunity to uncover principles of neuronal diversity and brain circuit organization, and inform  
479 us how functional studies should be conducted. To do this, a systematic and reproducible  
480 technology platform needs to be established. Here we report our effort in setting up such a  
481 platform that can be applied to potentially any neuronal type in any part of the mouse brain.

482 Our labeling strategy using stable and universal transgenic reporter mouse lines coupled with a  
483 variety of sparse Cre delivery methods has several advantages. First, we showed that the  
484 TIGRE2.0-based transgenic reporter lines, especially Ai166 which expresses a farnesylated GFP,  
485 produce very bright GFP labeling of axon fibers under fMOST imaging, revealing numerous  
486 terminal boutons, an essential requirement for obtaining truly complete, full morphologies.  
487 Second, this strategy enables sparse labeling across multiple regions within the same brain,  
488 improving efficiency compared to other methods (*e.g.*, *in vivo* electroporation or stereotaxic  
489 virus injection). Third, the labeling is highly consistent from cell to cell, cell type to cell type,  
490 region to region, and brain to brain, reducing variability often seen in other methods and creating  
491 a truly reproducible platform. Finally, sparse Cre recombination can be achieved through the use  
492 of transgenic Cre or CreERT2 driver lines labeling any neuronal type, or low-dose Cre viral  
493 vectors delivered through either local or systemic (*e.g.*, retroorbital) injections. In the future,  
494 sparse intersectional reporter lines like Ai166 can be developed, and their use in combination  
495 with dual driver lines can further enhance cell type targeting specificity and/or flexibility.

496 Development of novel and accessible software tools are also essential for reconstruction

497 efficiency. The enhanced Vaa3D-based reconstruction toolkit streamlines large-volume image  
498 data processing and computation-assisted manual reconstruction. We have developed a pipeline  
499 of tools to facilitate this process. Given the generally rapid progress in algorithm and software  
500 development, abundant opportunities also exist to develop even more tools to expedite the  
501 reconstruction process. The registration of the fMOST whole-brain datasets to the CCF allows  
502 quantification of projection strength in each target region across the entire brain for each neuron,  
503 and subsequent clustering analysis to identify the similarities and differences between neurons  
504 and to group them into types. The high signal intensity and low background in the fMOST  
505 fluorescent datasets allows the generation of high-quality reconstructions. In the future, with the  
506 accumulation of an increasingly larger set of reconstructed full morphologies, these can be used  
507 as training datasets to develop machine learning-based automatic reconstruction algorithms that  
508 have the potential to dramatically increase the throughput of reconstruction.

509 We are making all the fMOST imaging data publicly available through the BRAIN Cell Data  
510 Center (BCDC), and Vaa3D-based computational reconstruction tools are open-source. Our hope  
511 is that this will enable a community-based effort to collectively generate a sufficiently large  
512 number of full neuronal morphology reconstructions throughout the mouse brain, to facilitate a  
513 comprehensive understanding of the diversity and specificity of local and long-range  
514 connectivity at the single cell level across different neural circuits.

515 In a proof-of-principle case, we reconstructed the full morphologies of 96 neurons from the  
516 claustrum and cortex that belong to a single transcriptomically defined neuronal subclass, the  
517 Car3 subclass. We first found that both the dendritic morphology and the axonal projection target  
518 fields are substantially different between claustral and cortical Car3/Gnb4 neurons. Claustral  
519 neurons have significantly flatter dendritic arborizations than cortical Car3 neurons. Both types  
520 of neurons can be further divided into ipsilateral projecting only and bilateral projecting subtypes  
521 according to their axonal targets. Claustral neuron axons of the ipsilateral types travel over long  
522 distances mainly targeting distal cortical regions such as prefrontal and retrohippocampal cortical  
523 areas, whereas cortical Car3 neurons mainly target cortical regions around soma and project to  
524 other regions usually closer than CLA axons project. Claustral neuron axons of the bilateral  
525 types typically form asymmetrical clusters between the two hemispheres, while Car3 neurons  
526 typically form symmetrical clusters on both sides. We found that claustral neurons exhibit further  
527 diversity based on each neuron's unique axonal projection pattern. They can be grouped into  
528 medially projecting and laterally projecting subtypes. These two subtypes are intermingled  
529 together at the anterior and middle parts of the claustrum. But those CLA cells reconstructed  
530 from the posterior claustrum all belong to the medially projecting subtype, which we called  
531 "crown of thorns" neurons because their axons wrap around the entire ipsilateral cortex. There is  
532 also topographic variation of projection target fields along the anteroposterior axis among CLA.  
533 Collectively they cover almost the entire cortical surface, with particularly dense axonal  
534 projections into the medial and lateral prefrontal cortex and retrohippocampal cortex. Overall, we  
535 suggest that they work in a targeted and coordinated manner to affect cortical function. The  
536 cortical Car3 neurons exhibit an even greater degree of topographical specificity, with both  
537 source and target region-specific projection patterns.

538 In contrast to the morphological diversity, we observed very modest difference in single-cell  
539 transcriptomics among claustral neurons and cortical Car3 neurons coming from different  
540 cortical areas, even under more relaxed clustering conditions. The large diversity of axonal  
541 morphologies and projection patterns observed from less than 100 fully reconstructed neurons

542 from a transcriptomically relatively homogeneous cell population is striking. It underscores the  
543 necessity of scaling up the full neuronal morphology characterization effort to thousands to  
544 millions of neurons across all neural circuits and pathways to gain a true understanding of the  
545 extent of such diversity. Such knowledge is foundational for the understanding of brain  
546 connectivity and function. A critical bottleneck in this effort is the slow process of morphology  
547 reconstruction, a problem we believe is solvable using advanced computational approaches on  
548 high-quality imaging data.

549 The apparent lack of correlation between transcriptomic and morphological profiles in the Car3  
550 subclass of neurons at the current stage is also intriguing. It is possible that the current  
551 unsupervised clustering approach is insufficient to uncover the genes specifically relevant to  
552 morphology out of the overall gene expression variations. Alternatively, it is also possible that  
553 morphological/connectional specificity is established during circuit development and its gene  
554 expression correlate might also exist only at that time. In either case, the result emphasizes the  
555 importance to perform single cell characterization in multiple modalities and take an integrated  
556 approach to describe and classify cell types in an unbiased and comprehensive manner. For  
557 example, in this case, the cell type classification needs to incorporate both types of information  
558 that has been independently obtained. One classification scheme could be constructed with the  
559 major branch (first order) being the Car3 molecular subclass, the second order branches being  
560 the claustral and cortical divide, and the terminal leaves being the morphological subtypes with  
561 different projection patterns. More morphology reconstructions of these neurons will be needed  
562 to consolidate the terminal leaves, which might become clearer discrete types or a continuum. In  
563 the future, it will be important to develop methods that allow full morphology reconstruction and  
564 gene expression profiling to be conducted in the same cell, and apply them to the study of single  
565 cells in both adult stage and during brain development, so that potential molecular correlates of  
566 morphological/connectional features can be identified. This and other approaches together will  
567 ultimately lead to an integrated understanding of the extraordinary cellular diversity in the brain  
568 that underlies brain function.

569

## 570 **ACKNOWLEDGMENTS**

571 We are grateful to the In Vivo Sciences, Molecular Biology, Histology, and Imaging teams at the  
572 Allen Institute for their technical support. This work was funded by the Allen Institute for Brain  
573 Science, NIH grants MH105982 and EY023173 to H.Z., NIH grant MH114830 to H.Z. and Q.L.,  
574 NIH grants MH106008 and MH117079 to X.W.Y., NSFC grant 61721092 to Q.L., NSFC grant  
575 61871411 to L.Q., and by the Tiny Blue Dot Foundation to C.K. The data conversion, neuron  
576 annotation and processing tools TeraVR and some of the analyses including brain registration  
577 were funded by the Southeast University – Allen Institute Joint Center and Southeast University.  
578 The Wenzhou Medical University reconstruction team received funding from the EPFL - Blue  
579 Brain Project. The authors wish to thank the Allen Institute founder, Paul G. Allen, for his  
580 vision, encouragement, and support.

581

## 582 **AUTHOR CONTRIBUTIONS**

583 H.Z. conceptualized the study. M.B.V., T.L.D., B.T. and X.W.Y. generated the TIGRE-MORF  
584 (Ai166) mouse line. Z.J.H. provided Fezf2-CreER and Plxnd1-CreER mouse lines. K.E.H., R.L.

585 T.L.D., B.T. and J.A.H. contributed to the generation and characterization of specific transgenic  
586 mouse lines. H.G., A.L., S.Z., X.L., J.Y. and Q.L. conducted fMOST imaging. W.W., S.J., Y.Y.  
587 and C.H. handled the imaging data. L.Q., L.N. and H.P. developed methods for registration of  
588 fMOST datasets to CCF. Z.Z., S.J., Y.Y., Yimin W. and H.P. developed software tools for data  
589 conversion and morphology reconstruction. Yun W., X.K., Y.L., L.L., P.L., Y.S., L.Y., S.Z.,  
590 A.F. and E.S. performed manual morphology reconstruction. Yun W., P.X., J.A.H. and H.P.  
591 performed manual or computational classification of morphological types. Z.Z., S.K. and S.A.S.  
592 assisted with morphological analysis. K.E.H., Q.X. and J.A.H. conducted anterograde AAV  
593 tracing. T.N.N. performed retrograde tracing. Z.Y., T.N.N. and B.T. conducted scRNA-seq data  
594 generation and analysis. S.M. and S.M.S. provided project management. L.E., M.J.H., B.T.,  
595 L.N., S.A.S., J.A.H., H.G., Q.L., H.P., H.Z. and C.K. provided scientific management. H.Z.  
596 wrote the manuscript in consultation with all authors.

597

#### 598 **DECLARATION OF INTERESTS**

599 The authors declare no competing interests.

600

601

602 **REFERENCES**

603

604 Aransay, A., Rodriguez-Lopez, C., Garcia-Amado, M., Clasca, F., and Prensa, L. (2015). Long-  
605 range projection neurons of the mouse ventral tegmental area: a single-cell axon tracing analysis.  
606 *Frontiers in neuroanatomy* 9, 59.

607 Atlan, G., Terem, A., Peretz-Rivlin, N., Sehrawat, K., Gonzales, B.J., Pozner, G., Tasaka, G.I.,  
608 Goll, Y., Refaeli, R., Zviran, O., et al. (2018). The Claustrum Supports Resilience to Distraction.  
609 *Curr Biol* 28, 2752-2762 e2757.

610 Bria, A., Iannello, G., Onofri, L., and Peng, H. (2016). TeraFly: real-time three-dimensional  
611 visualization and annotation of terabytes of multidimensional volumetric images. *Nature*  
612 *methods* 13, 192-194.

613 Cadwell, C.R., Palasantza, A., Jiang, X., Berens, P., Deng, Q., Yilmaz, M., Reimer, J., Shen, S.,  
614 Bethge, M., Tolias, K.F., et al. (2016). Electrophysiological, transcriptomic and morphologic  
615 profiling of single neurons using Patch-seq. *Nature biotechnology* 34, 199-203.

616 Chan, K.Y., Jang, M.J., Yoo, B.B., Greenbaum, A., Ravi, N., Wu, W.L., Sanchez-Guardado, L.,  
617 Lois, C., Mazmanian, S.K., Deverman, B.E., et al. (2017). Engineered AAVs for efficient  
618 noninvasive gene delivery to the central and peripheral nervous systems. *Nature neuroscience* 20,  
619 1172-1179.

620 Chatterjee, S., Sullivan, H.A., MacLennan, B.J., Xu, R., Hou, Y., Lavin, T.K., Lea, N.E.,  
621 Michalski, J.E., Babcock, K.R., Dietrich, S., et al. (2018). Nontoxic, double-deletion-mutant  
622 rabies viral vectors for retrograde targeting of projection neurons. *Nature neuroscience* 21, 638-  
623 646.

624 Crick, F.C., and Koch, C. (2005). What is the function of the claustrum? *Philosophical*  
625 *transactions of the Royal Society of London Series B, Biological sciences* 360, 1271-1279.

626 Daigle, T.L., Madisen, L., Hage, T.A., Valley, M.T., Knoblich, U., Larsen, R.S., Takeno, M.M.,  
627 Huang, L., Gu, H., Larsen, R., et al. (2018). A Suite of Transgenic Driver and Reporter Mouse  
628 Lines with Enhanced Brain-Cell-Type Targeting and Functionality. *Cell* 174, 465-480 e422.

629 Economo, M.N., Clack, N.G., Lavis, L.D., Gerfen, C.R., Svoboda, K., Myers, E.W., and  
630 Chandrashekar, J. (2016). A platform for brain-wide imaging and reconstruction of individual  
631 neurons. *eLife* 5, e10566.

632 Economo, M.N., Viswanathan, S., Tasic, B., Bas, E., Winnubst, J., Menon, V., Graybiel, L.T.,  
633 Nguyen, T.N., Smith, K.A., Yao, Z., et al. (2018). Distinct descending motor cortex pathways  
634 and their roles in movement. *Nature* 563, 79-84.

635 Fuzik, J., Zeisel, A., Mate, Z., Calvigioni, D., Yanagawa, Y., Szabo, G., Linnarsson, S., and  
636 Harkany, T. (2016). Integration of electrophysiological recordings with single-cell RNA-seq data  
637 identifies neuronal subtypes. *Nature biotechnology* 34, 175-183.



- 638 Gamanut, R., Kennedy, H., Toroczkai, Z., Ercsey-Ravasz, M., Van Essen, D.C., Knoblauch, K.,  
639 and Burkhalter, A. (2018). The Mouse Cortical Connectome, Characterized by an Ultra-Dense  
640 Cortical Graph, Maintains Specificity by Distinct Connectivity Profiles. *Neuron* 97, 698-715  
641 e610.
- 642 Gang, Y., Zhou, H., Jia, Y., Liu, L., Liu, X., Rao, G., Li, L., Wang, X., Lv, X., Xiong, H., et al.  
643 (2017). Embedding and Chemical Reactivation of Green Fluorescent Protein in the Whole  
644 Mouse Brain for Optical Micro-Imaging. *Frontiers in neuroscience* 11, 121.
- 645 Ghosh, S., Larson, S.D., Hefzi, H., Marnoy, Z., Cutforth, T., Dokka, K., and Baldwin, K.K.  
646 (2011). Sensory maps in the olfactory cortex defined by long-range viral tracing of single  
647 neurons. *Nature* 472, 217-220.
- 648 Goll, Y., Atlan, G., and Citri, A. (2015). Attention: the claustrum. *Trends in neurosciences* 38,  
649 486-495.
- 650 Gong, H., Xu, D., Yuan, J., Li, X., Guo, C., Peng, J., Li, Y., Schwarz, L.A., Li, A., Hu, B., et al.  
651 (2016). High-throughput dual-colour precision imaging for brain-wide connectome with  
652 cytoarchitectonic landmarks at the cellular level. *Nature communications* 7, 12142.
- 653 Guo, Z.V., Inagaki, H.K., Daie, K., Druckmann, S., Gerfen, C.R., and Svoboda, K. (2017).  
654 Maintenance of persistent activity in a frontal thalamocortical loop. *Nature* 545, 181-186.
- 655 Han, Y., Kebschull, J.M., Campbell, R.A.A., Cowan, D., Imhof, F., Zador, A.M., and Mrsic-  
656 Flogel, T.D. (2018). The logic of single-cell projections from visual cortex. *Nature* 556, 51-56.
- 657 Harris, K.D., and Shepherd, G.M. (2015). The neocortical circuit: themes and variations. *Nature*  
658 *neuroscience* 18, 170-181.
- 659 Hnasko, T.S., Perez, F.A., Scouras, A.D., Stoll, E.A., Gale, S.D., Luquet, S., Phillips, P.E.,  
660 Kremer, E.J., and Palmiter, R.D. (2006). Cre recombinase-mediated restoration of nigrostriatal  
661 dopamine in dopamine-deficient mice reverses hypophagia and bradykinesia. *Proceedings of the*  
662 *National Academy of Sciences of the United States of America* 103, 8858-8863.
- 663 Jackson, J., Karnani, M.M., Zemelman, B.V., Burdakov, D., and Lee, A.K. (2018). Inhibitory  
664 Control of Prefrontal Cortex by the Claustrum. *Neuron* 99, 1029-1039 e1024.
- 665 Jiang, X., Shen, S., Cadwell, C.R., Berens, P., Sinz, F., Ecker, A.S., Patel, S., and Tolias, A.S.  
666 (2015). Principles of connectivity among morphologically defined cell types in adult neocortex.  
667 *Science (New York, NY 350, aac9462.*
- 668 Kebschull, J.M., Garcia da Silva, P., Reid, A.P., Peikon, I.D., Albeanu, D.F., and Zador, A.M.  
669 (2016). High-Throughput Mapping of Single-Neuron Projections by Sequencing of Barcoded  
670 RNA. *Neuron* 91, 975-987.
- 671 Kita, T., and Kita, H. (2012). The subthalamic nucleus is one of multiple innervation sites for  
672 long-range corticofugal axons: a single-axon tracing study in the rat. *J Neurosci* 32, 5990-5999.

- 673 Li, A., Gong, H., Zhang, B., Wang, Q., Yan, C., Wu, J., Liu, Q., Zeng, S., and Luo, Q. (2010).  
674 Micro-optical sectioning tomography to obtain a high-resolution atlas of the mouse brain.  
675 Science (New York, NY 330, 1404-1408.
- 676 Li, L., Ouellette, B., Stoy, W.A., Garren, E.J., Daigle, T.L., Forest, C.R., Koch, C., and Zeng, H.  
677 (2017). A robot for high yield electrophysiology and morphology of single neurons in vivo.  
678 Nature communications 8, 15604.
- 679 Lin, H.M., Kuang, J.X., Sun, P., Li, N., Lv, X., and Zhang, Y.H. (2018a). Reconstruction of  
680 Intratelencephalic Neurons in the Mouse Secondary Motor Cortex Reveals the Diverse  
681 Projection Patterns of Single Neurons. *Frontiers in neuroanatomy* 12, 86.
- 682 Lin, R., Wang, R., Yuan, J., Feng, Q., Zhou, Y., Zeng, S., Ren, M., Jiang, S., Ni, H., Zhou, C., et  
683 al. (2018b). Cell-type-specific and projection-specific brain-wide reconstruction of single  
684 neurons. *Nature methods* 15, 1033-1036.
- 685 Markram, H., Muller, E., Ramaswamy, S., Reimann, M.W., Abdellah, M., Sanchez, C.A.,  
686 Ailamaki, A., Alonso-Nanclares, L., Antille, N., Arsever, S., et al. (2015). Reconstruction and  
687 Simulation of Neocortical Microcircuitry. *Cell* 163, 456-492.
- 688 Martersteck, E.M., Hirokawa, K.E., Evarts, M., Bernard, A., Duan, X., Li, Y., Ng, L., Oh, S.W.,  
689 Ouellette, B., Royall, J.J., et al. (2017). Diverse Central Projection Patterns of Retinal Ganglion  
690 Cells. *Cell reports* 18, 2058-2072.
- 691 Mathur, B.N. (2014). The claustrum in review. *Frontiers in systems neuroscience* 8, 48.
- 692 Minciacchi, D., Molinari, M., Bentivoglio, M., and Macchi, G. (1985). The organization of the  
693 ipsi- and contralateral claustrrocortical system in rat with notes on the bilateral claustrrocortical  
694 projections in cat. *Neuroscience* 16, 557-576.
- 695 Oh, S.W., Harris, J.A., Ng, L., Winslow, B., Cain, N., Mihalas, S., Wang, Q., Lau, C., Kuan, L.,  
696 Henry, A.M., et al. (2014). A mesoscale connectome of the mouse brain. *Nature* 508, 207-214.
- 697 Peng, H., Chung, P., Long, F., Qu, L., Jenett, A., Seeds, A.M., Myers, E.W., and Simpson, J.H.  
698 (2011). BrainAligner: 3D registration atlases of Drosophila brains. *Nature methods* 8, 493-500.
- 699 Peng, H., Ruan, Z., Long, F., Simpson, J.H., and Myers, E.W. (2010). V3D enables real-time 3D  
700 visualization and quantitative analysis of large-scale biological image data sets. *Nature*  
701 *biotechnology* 28, 348-353.
- 702 Ragan, T., Kadiri, L.R., Venkataraju, K.U., Bahlmann, K., Sutin, J., Taranda, J., Arganda-  
703 Carreras, I., Kim, Y., Seung, H.S., and Osten, P. (2012). Serial two-photon tomography for  
704 automated ex vivo mouse brain imaging. *Nature methods* 9, 255-258.
- 705 Ramón y Cajal, S. (1909). *Histologie Du Système Nerveux de L'homme & Des Vertébrés*.  
706 (Paris: Maloine [Translated by N. Swanson and L.W. Swanson, Oxford University Press, 1995]).
- 707 Remedios, R., Logothetis, N.K., and Kayser, C. (2010). Unimodal responses prevail within the  
708 multisensory claustrum. *J Neurosci* 30, 12902-12907.

- 709 Remedios, R., Logothetis, N.K., and Kayser, C. (2014). A role of the claustrum in auditory scene  
710 analysis by reflecting sensory change. *Frontiers in systems neuroscience* 8, 44.
- 711 Saunders, A., Macosko, E.Z., Wysoker, A., Goldman, M., Krienen, F.M., de Rivera, H., Bien, E.,  
712 Baum, M., Bortolin, L., Wang, S., et al. (2018). Molecular Diversity and Specializations among  
713 the Cells of the Adult Mouse Brain. *Cell* 174, 1015-1030 e1016.
- 714 Scorcioni, R., Polavaram, S., and Ascoli, G.A. (2008). L-Measure: a web-accessible tool for the  
715 analysis, comparison and search of digital reconstructions of neuronal morphologies. *Nature*  
716 *protocols* 3, 866-876.
- 717 Sherman, S.M. (2016). Thalamus plays a central role in ongoing cortical functioning. *Nature*  
718 *neuroscience* 19, 533-541.
- 719 Smith, J.B., Alloway, K.D., Hof, P.R., Orman, R., Reser, D.H., Watakabe, A., and Watson,  
720 G.D.R. (2018). The relationship between the claustrum and endopiriform nucleus: A perspective  
721 towards consensus on cross-species homology. *The Journal of comparative neurology*.
- 722 Smythies, J., Edelstein, L., and Ramachandran, V. (2012). Hypotheses relating to the function of  
723 the claustrum. *Frontiers in integrative neuroscience* 6, 53.
- 724 Smythies, J., Edelstein, L., and Ramachandran, V. (2014). Hypotheses relating to the function of  
725 the claustrum II: does the claustrum use frequency codes? *Frontiers in integrative neuroscience*  
726 8, 7.
- 727 Tasic, B., Menon, V., Nguyen, T.N., Kim, T.K., Jarsky, T., Yao, Z., Levi, B., Gray, L.T.,  
728 Sorensen, S.A., Dolbeare, T., et al. (2016). Adult mouse cortical cell taxonomy revealed by  
729 single cell transcriptomics. *Nature neuroscience* 19, 335-346.
- 730 Tasic, B., Yao, Z., Graybuck, L.T., Smith, K.A., Nguyen, T.N., Bertagnolli, D., Goldy, J.,  
731 Garren, E., Economo, M.N., Viswanathan, S., et al. (2018). Shared and distinct transcriptomic  
732 cell types across neocortical areas. *Nature* 563, 72-78.
- 733 Tervo, D.G., Hwang, B.Y., Viswanathan, S., Gaj, T., Lavzin, M., Ritola, K.D., Lindo, S.,  
734 Michael, S., Kuleshova, E., Ojala, D., et al. (2016). A Designer AAV Variant Permits Efficient  
735 Retrograde Access to Projection Neurons. *Neuron* 92, 372-382.
- 736 Wang, Q., Ng, L., Harris, J.A., Feng, D., Li, Y., Royall, J.J., Oh, S.W., Bernard, A., Sunkin,  
737 S.M., Koch, C., et al. (2017). Organization of the connections between claustrum and cortex in  
738 the mouse. *The Journal of comparative neurology* 525, 1317-1346.
- 739 Wang, Y., Ye, M., Kuang, X., Li, Y., and Hu, S. (2018). A simplified morphological  
740 classification scheme for pyramidal cells in six layers of primary somatosensory cortex of  
741 juvenile rats. *IBRO Rep* 5, 74-90.
- 742 White, M.G., and Mathur, B.N. (2018). Claustrum circuit components for top-down input  
743 processing and cortical broadcast. *Brain structure & function* 223, 3945-3958.

- 744 Xiong, H., Zhou, Z., Zhu, M., Lv, X., Li, A., Li, S., Li, L., Yang, T., Wang, S., Yang, Z., et al.  
745 (2014). Chemical reactivation of quenched fluorescent protein molecules enables resin-  
746 embedded fluorescence microimaging. *Nature communications* 5, 3992.
- 747 Yardeni, T., Eckhaus, M., Morris, H.D., Huizing, M., and Hoogstraten-Miller, S. (2011). Retro-  
748 orbital injections in mice. *Lab Anim (NY)* 40, 155-160.
- 749 Zeisel, A., Hochgerner, H., Lonnerberg, P., Johnsson, A., Memic, F., van der Zwan, J., Haring,  
750 M., Braun, E., Borm, L.E., La Manno, G., et al. (2018). Molecular Architecture of the Mouse  
751 Nervous System. *Cell* 174, 999-1014 e1022.
- 752 Zeisel, A., Munoz-Manchado, A.B., Codeluppi, S., Lonnerberg, P., La Manno, G., Jureus, A.,  
753 Marques, S., Munguba, H., He, L., Betsholtz, C., et al. (2015). Brain structure. Cell types in the  
754 mouse cortex and hippocampus revealed by single-cell RNA-seq. *Science (New York, NY)* 347,  
755 1138-1142.
- 756 Zeng, H., and Sanes, J.R. (2017). Neuronal cell-type classification: challenges, opportunities and  
757 the path forward. *Nature reviews* 18, 530-546.
- 758 Zhang, Z.W., and Deschenes, M. (1997). Intracortical axonal projections of lamina VI cells of  
759 the primary somatosensory cortex in the rat: a single-cell labeling study. *J Neurosci* 17, 6365-  
760 6379.
- 761 Zingg, B., Dong, H.W., Tao, H.W., and Zhang, L.I. (2018). Input-output organization of the  
762 mouse claustrum. *The Journal of comparative neurology* 526, 2428-2443.
- 763 Zingg, B., Hintiryan, H., Gou, L., Song, M.Y., Bay, M., Bienkowski, M.S., Foster, N.N.,  
764 Yamashita, S., Bowman, I., Toga, A.W., et al. (2014). Neural networks of the mouse neocortex.  
765 *Cell* 156, 1096-1111.
- 766
- 767

768 **Figure Legends**

769

770 **Figure 1. Sparse, robust and consistent neuronal labeling by combining TIGRE2.0**  
771 **transgenic reporter lines with sparse Cre delivery.**

772 (A) Schematic diagram showing the combination of CreERT2 transgenic driver line or Cre-  
773 expressing AAV with the GFP-expressing TIGRE2.0 reporter line Ai139 or Ai140. Very low  
774 dose tamoxifen induction of CreERT2 or very low-titer AAV-Cre delivery results in activation  
775 of the reporter in a spatially sparse manner. Transgenic reporter expression of GFP is robust and  
776 consistent across different cells. An optional addition is to cross in the GFP-expressing  
777 TIGRE1.0 reporter line Ai82, so that the tTA2 from Ai139 or Ai140 will activate the expression  
778 of GFP from two alleles – Ai139/Ai140 and Ai82, further increasing the level of GFP within  
779 Cre<sup>+</sup> cells.

780 (B) Schematic diagram showing the combination of Cre or CreERT2 transgenic driver line or  
781 Cre-expressing AAV with the GFP-expressing sparse reporter line TIGRE-MORF/Ai166. Due to  
782 the intrinsic sparse expression of MORF (G<sub>22</sub>-GFPf), some conventional Cre lines, moderate  
783 doses of tamoxifen induction of CreERT2, or moderate titers of AAV-Cre delivery can result in  
784 sparse labeling.

785 (C-L) Representative TissueCyte images showing sparse and strong labeling of various types of  
786 neurons using the above approach. (C) A Synapsin I promoter-driven CreERT2-expressing AAV  
787 serotyped with PHP.eB was delivered at a dilution of 1:1000 by retroorbital injection into an  
788 Ai139 mouse, followed by a 1-day tamoxifen induction one week post injection, resulting in  
789 random sparse labeling of neurons throughout the brain. (D) In a Tnnt1-IRES2-CreERT2;Ai140  
790 brain, low-dose tamoxifen induction results in sparse labeling of thalamic projection neurons  
791 (left panel) with their axon terminal clusters in cortex clearly visible (right panel). (E) In a Gnb4-  
792 IRES2-CreERT2;Ai140;Ai82 brain, low-dose tamoxifen induction results in sparse labeling of  
793 Gnb4<sup>+</sup> claustral and cortical neurons with their widely dispersed axon fibers clearly visible. (F)  
794 Cortical L6b neurons in a Ctgf-T2A-dgCre;Ai166 brain. (G) Cortical L2/3/4 neurons in a Cux2-  
795 CreERT2;Ai166 brain. (H) Cortical L5 PT neurons in a Fezf2-CreER;Ai166 brain. (I)  
796 Serotonergic neurons in dorsal raphe (DR) in a Slc6a4-CreERT2\_EZ13;Ai166 brain. (J)  
797 Interneurons in cortex and cerebellum in a Pvalb-T2A-CreERT2;Ai166 brain. (K) Th<sup>+</sup> cortical  
798 interneurons in a Th-Cre;Ai166 brain. (L) Projection neurons in LGd and other thalamic nuclei  
799 in a Vipr2-IRES2-Cre-neo;Ai166 brain. Third panel, axon projections from LGd neurons are  
800 seen in primary visual cortex (VISp). Fourth panel, axon projections likely from retinal ganglion  
801 cells are seen in superior colliculus (SC). Tamoxifen doses for CreERT2-containing mice are  
802 shown in **Table S1**.

803

804 **Figure 2. Sparse, robust and consistent visualization of the dendritic and axonal**  
805 **arborizations of a wide range of neuronal types by fMOST imaging.**

806 Images shown are 100- $\mu$ m maximum intensity projection (MIP) images (*i.e.*, projected from 100  
807 consecutive 1- $\mu$ m image planes). Arrowheads indicate observed terminal boutons at the end of  
808 the axon segments. Tamoxifen doses are shown in **Table S1**.

809 (A) Cortical L2/3 IT neurons and their extensive local axon collaterals clearly labeled in a Cux2-  
810 CreERT2;Ai166 brain.

811 (B) Cortical L5 PT neurons and their sparse local axon collaterals seen in a *Fezf2-CreER;Ai166*  
812 brain.

813 (C) Cortical L5 IT neurons and their local axon collaterals seen in a *Plxnd1-CreER;Ai166* brain.  
814 Striatal medium spiny neurons (STR MSN) are also sparsely labeled, and their individual axons  
815 are clearly seen in substantia nigra (SN).

816 (D) *Gnb4+* claustral (CLA) and cortical (L6PC) neurons with their widely dispersed axon fibers  
817 seen in a *Gnb4-IRES2-CreERT2;Ai140;Ai82* brain.

818 (E) Noradrenergic neurons labeled in the locus ceruleus (LC), and their long-range axon fibers  
819 seen in cortex (CTX) and hypothalamus (HY) in a *Dbh-Cre\_KH212;Ai166* brain.

820 (F) Serotonergic neurons labeled in the dorsal raphe (DR), and their long-range axon fibers seen  
821 in hippocampus (HIP) and cortex (CTX) in a *Slc6a4-CreERT2\_EZ13;Ai166* brain.

822 (G) Cortical inhibitory basket cells (BC) and translaminar basket cells (t-BC), as well as L5 PT  
823 excitatory neurons, seen in a *Pvalb-T2A-CreERT2;Ai166* brain. The L5 PT neurons form  
824 driving-type axon clusters with large boutons in the thalamus (TH).

825 (H) Thalamic projection neurons (TH PN) with their dense axon terminal clusters in cortex seen  
826 in a *Tnnt1-IRES2-CreERT2;Ai82;Ai140* brain. Some STR MSNs are also labeled and they form  
827 intense axon clusters in SN.

828 (I) In a *Vipr2-IRES2-Cre-neo;Ai166* brain, axon clusters from projection neurons in visual  
829 thalamic nuclei are seen in CTX, axon clusters likely from retinal ganglion cells are seen in  
830 superior colliculus (SC), and a cortical chandelier cell (ChC) is also fully labeled with its  
831 characteristic axonal branches.

832

833 **Figure 3. The workflow of neuron visualization, reconstruction, mapping to Common**  
834 **Coordinate Framework (CCF) and analysis.**

835 A complete fMOST image dataset is first converted to TereFly file format by TeraConverter, the  
836 data formatting tool in TeraFly (Bria et al., 2016). Then annotators work in the TeraVR  
837 annotation system (Wang et al., bioRxiv preprint <https://doi.org/10.1101/621011>, 2018) to  
838 reconstruct the full morphology of each neuron. In parallel, the whole brain image dataset is  
839 registered to CCF using BrainAligner (Peng et al., 2011), first using RLM, the Reliable-  
840 Landmark-Matching module of BrainAligner, then LQM, the Little-Quick-Warp module of  
841 BrainAligner. Following registration of the image dataset, all the reconstructed morphologies  
842 from the same brain are also registered for subsequent visualization and quantitative analysis.

843

844 **Figure 4. Anterograde projection mapping from *Gnb4+* neurons in claustrum or lateral**  
845 **cortex.**

846 (A-E) AAV2/1-pCAG-FLEX-GFP tracer was injected into the claustrum (A-B), SSs (C-D) or  
847 SSp (E) in *Gnb4-IRES2-Cre* or *Gnb4-IRES2-CreERT2* mice. Brains were imaged by the  
848 TissueCyte STPT system. First panel in each row shows the top-down view of segmented GFP-  
849 labeled axon projections in the cortex. Second panel shows the injection site. Third panel shows  
850 the fine axon fibers in respective target cortical areas. Fourth panel shows the segmented image  
851 of the third panel to visualize and quantify the axon fibers. Full STPT image datasets are

852 available at the Allen Mouse Brain Connectivity Atlas web portal (<http://connectivity.brain->  
853 [map.org/](http://connectivity.brain-map.org/)) with the following experiment IDs: A, 514505957; B, 485902743; C, 553446684; D,  
854 581327676; E, 656688345.

855

856 **Figure 5. Soma locations and quantitative comparison of dendritic and axonal morphology**  
857 **features of *Gnb4*+ claustral and cortical neurons.**

858 (A) Soma locations of all reconstructed neurons in the four *Gnb4*-IRES2-CreERT2 brains. Soma  
859 locations are registered and flipped to one hemisphere, shown in three views and grouped by the  
860 brain ID's. Color scheme: L6PC in blue, CLA in orange. Same below.

861 (B) Dendritic features that distinguish CLA and L6PC neurons. P-values (shown underneath  
862 each feature label) for all violin plots were calculated by Mann-Whitney tests (same below). Top  
863 panel: distribution of dendritic morphological features grouped by neuron types. Dendrites were  
864 centered by the soma and rotated by PCA (principle component analysis) so the  
865 width/height/depth match the longest to shortest dimensions. Lower left panel: 2D display of  
866 dendrites ordered by the depth. Lower right panel: Gaussian kernel density distribution of  
867 dendrites combined by neuron types. Red arrows indicate the 5<sup>th</sup> and 95<sup>th</sup> percentile of each  
868 direction.

869 (C) Axonal features that distinguish CLA and L6PC neurons. Left panels: differential global  
870 axon morphological features grouped by neurons types. Width/height/depth match the anterior-  
871 posterior/top-bottom/left-right directions of the mouse brain. Middle panels: Gaussian kernel  
872 density distribution of axon skeletons combined by neuron types. Right panels: differential local  
873 axon morphological features grouped by neuron types. Bottom: 2D display of local axons  
874 ordered by the width.

875

876 **Figure 6. Axonal morphologies and manual classification of *Gnb4*+ claustral and cortical**  
877 **neurons.**

878 (A) CLA neurons (n = 34) from 4 *Gnb4* brains were manually classified into four morphological  
879 types, each shown in top-down, coronal and sagittal views with all neurons for each type (their  
880 somata and dendrites are labeled in blue and their axons labeled in different colors). CLA cells of  
881 each type were merged together according to their soma locations after registration to CCF.  
882 CLA\_I-ipsi cells (n = 19) are characterized by their axonal projections within the ipsilateral  
883 hemisphere and predominantly along the midline cortical regions, which have somata distributed  
884 at the full length of the claustrum. CLA\_I-bi cells (n = 9) are characterized by the bilateral  
885 axonal projections predominantly along the midline cortical regions of the ipsilateral side.  
886 CLA\_II-ipsi cells (n = 5) are characterized by their axonal projections within the ipsilateral  
887 hemisphere and virtually avoiding the midline cortical regions. CLA\_II-bi cell (n = 1) is  
888 characterized by its axonal projections to both ipsi- and contralateral hemispheres and virtually  
889 avoiding the midline region on both sides.

890 (B) L6PCs (n = 62) from 4 *Gnb4* brains were manually classified into two morphological types,  
891 shown here in the same way as CLA cells after registration to CCF. L6PC\_ipsi cells (n = 36) are  
892 characterized by their axonal projections within the ipsilateral hemisphere; L6PC\_bi cells (n =  
893 26) have axonal projections to both hemispheres.

894 (C) CLA neurons have topographically distinct projection patterns based on the anterior-  
895 posterior positions of their somata. CLA\_I-ipsi: the panels from left to right contain 5, 5 and 9  
896 cells, respectively. CLA\_I-bi: the panels from left to right contain 3 and 6 cells, respectively.

897 (D) L6PC neurons have topographically distinct projection patterns based on the anterior-  
898 posterior positions of their somata. L6PC\_ipsi: the panels from left to right contain 10, 6 and 20  
899 cells, respectively. L6PC\_bi: the panels from left to right contain 16, 2 and 8 cells, respectively.

900

901 **Figure 7. Computational clustering-based classification of *Gnb4*+ claustral and cortical**  
902 **neurons.**

903 (A) Integrated co-clustering matrix by averaging the co-clustering matrices of four feature sets:  
904 projection pattern, soma location, axon morphology and dendrite morphology. Side bars indicate  
905 manually assigned types with color codes shown below the matrix.

906 (B) Dendrogram based on the co-clustering matrix. Threshold for cluster calls is shown as the  
907 dashed line. Each cluster is annotated by the brain regions where somata (black) and axon  
908 clusters (red) reside. Regions were selected to represent >50% of cluster members.

909 (C) Left panel: 2D UMAP of co-clustering matrix. Each dot represents a neuron colored by  
910 manually assigned types and numbered by computational cluster ID's. Right panel: Sankey plot  
911 for the correspondence between manual and computational types. Width of connecting lines  
912 represents number of cells.

913 (D) Heatmap for representative target brain regions of each neuron. Columns represent single  
914 cells sorted by cluster assignments and rows represent target brain regions.

915 (E) Total number of cortical targets contacted by each neuron grouped by clusters. Ipsilateral and  
916 contralateral targets are counted separately. A minimum of 1 axon terminal (top panel) or 1,000  
917  $\mu\text{m}$  of axon length (bottom panel) is used as the threshold to label a region as "targeted".

918 (F) Top-down views of neurons in each cluster. Neurons are flipped all to the left hemisphere for  
919 comparison of axon projection patterns. Stars indicate soma locations and are flipped to the right  
920 hemisphere for visualization purpose.

921

922 **Figure 8. Single-cell RNA-seq characterization of *Car3* subclass of claustral and cortical**  
923 **neurons.**

924 (A) Dendrogram of the co-clustering analysis of SMART-Seq v4 data from ~75,000 cortical,  
925 hippocampal and claustral cells reveals a distinct branch of *Car3* subclass (shown in the dashed  
926 box, upper left panel), which contains nearly all the neurons isolated from claustrum from the  
927 *Gnb4-IRES2-CreERT2;Ai140* mice (lower left panel). Middle panel: The *Car3* subclass consists  
928 of one major cluster that contains cells from both claustrum and cortex, plus six additional minor  
929 clusters. Dot plot below the dendrogram shows the number of cells from each cortical region or  
930 claustrum contributing to each cluster. In the tSNE plots (right panels), the claustral and cortical  
931 neurons are intermingled together in the major cluster, whereas one of the minor clusters, *Car3*  
932 TEa-PER1-ECT\_GU Hgf, contains mostly cells from TEa.

933 (B) Re-clustering analysis of SMART-Seq v4 data from 1,997 *Car3* subclass cells from (A)  
934 using a more relaxed clustering criterion. This includes 298 Retro-seq cells labeled by retrograde



935 tracers injected into ACA, VISpl, ORBl or MOp and isolated from claustrum or various cortical  
936 areas (*i.e.*, SSs, VISp, AI and TEa) on both ipsilateral and contralateral sides of the tracer  
937 injection. Dot plot below the new dendrogram of 19 clusters shows the number of cells from  
938 each cortical area or claustrum contributing to each cluster. The tSNE plots (right panels) show  
939 distribution of cells color-coded by clusters or Cre lines.

940 (C) Correlation of transcriptomic clusters with regions where all 1,997 Car3 cells were isolated  
941 from (left), and retrograde tracer injection sites (middle) and hemispheres (right) the 298 Retro-  
942 seq cells came from using tSNE plots.

943

944

945 **Methods**

946

947 **CONTACT FOR REAGENT AND RESOURCE SHARING**

948 Further information and requests for resources and reagents should be directed to and will be  
949 fulfilled by the Lead Contact, Hongkui Zeng ([hongkuiz@alleninstitute.org](mailto:hongkuiz@alleninstitute.org)).

950

951 **EXPERIMENTAL MODEL AND SUBJECT DETAILS**

952 **Animal care and use**

953 Both male and female transgenic mice  $\geq$  P56 were utilized for all experiments. All animals were  
954 housed 3-5 per cage and maintained on a 12-hour light/dark cycle, in a humidity- and  
955 temperature-controlled room with water and food available *ad libitum*. All experimental  
956 procedures related to the use of mice were conducted with approved protocols in accordance  
957 with NIH guidelines, and were approved by the Institutional Animal Care and Use Committee  
958 (IACUC) of the Allen Institute for Brain Science.

959

960 **METHOD DETAILS**

961 **For the acronyms and full names of all brain regions mentioned, see the CCFv3 ontology**  
962 **tab of Table S4.**

963

964 **Transgenic mice**

965 All transgenic crosses are listed in **Table S1**. Data for systematic characterization of the  
966 expression pattern of each transgenic mouse line can be found in the AIBS Transgenic  
967 Characterization database (<http://connectivity.brain-map.org/transgenic/search/basic>).

968 Induction of CreERT2 driver lines was done by administration via oral gavage (PO) of tamoxifen  
969 (50 mg/ml in corn oil) at original (0.2 mg/g body weight) or reduced dose for one day in an adult  
970 mouse. The dosage for mice age P7-P15 is 0.04 ml. Mice can be used for experiments at 2 or  
971 more weeks after tamoxifen dosing. Specific dose of tamoxifen to induce sparse labeling in each  
972 CreERT2 driver line is shown in **Table S1**.

973 Brain-wide delivery of low-dose Cre-expressing AAV-PHP.eB virus was achieved by retro-  
974 orbital injection using a previously described technique (Yardeni et al., 2011). The PHP.eB  
975 variant of AAV can cross the blood brain barrier with a tropism towards CNS cells, allowing  
976 vascular delivery of the virus to extend throughout the brain (Chan et al., 2017). A viral load of  
977 approximately  $1 \times 10^8$  particles was diluted into 50  $\mu$ L sterile PBS and injected into the retro-  
978 orbital sinus of anesthetized mice using a 31G insulin syringe. In Cre driver virus experiments,  
979 mice were perfused 21 days following injection. In CreERT2 driver virus experiments, mice  
980 were perfused 21 days following a single dose of tamoxifen induction administered 5-7 days  
981 after AAV injection, either at the original or reduced dose as described in the CreERT2 driver  
982 line experiments above.

983

984 **TissueCyte STPT imaging**

985 Imaging by serial two-photon (STP) tomography (TissueCyte 1000, TissueVision Inc.  
986 Somerville, MA) has been described in earlier published studies (Martersteck et al., 2017; Oh et  
987 al., 2014; Ragan et al., 2012).

988 Mice were deeply anesthetized with 5% isoflurane and intracardially perfused with 10 ml of  
989 saline (0.9% NaCl) followed by 50 ml of freshly prepared 4% paraformaldehyde (PFA) at a flow  
990 rate of 9 ml/min. Brains were dissected and post-fixed in 4% PFA at room temperature for 3–6 h  
991 and then overnight at 4 °C. Brains were rinsed briefly with PBS and stored in PBS with 0.1%  
992 sodium azide until imaging.

993 Prior to imaging, the brain was embedded in a 4.5% oxidized (10 mM NaIO<sub>4</sub>) agarose solution  
994 in a grid-lined embedding mold to standardize its placement in an aligned coordinate space. The  
995 agarose block was then left at room temperature for 20 min to allow solidification. Covalent  
996 interactions between brain tissue and agarose were promoted by placing the solidified block in  
997 0.5% sodium borohydride in 0.5 M sodium borate buffer (pH 9.0) overnight at 4 °C. The agarose  
998 block was then mounted on a 1 × 3 glass slide using Loctite 404 glue and prepared immediately  
999 for serial imaging.

1000 Image acquisition was accomplished using TissueCyte 1000 systems (TissueVision, Cambridge,  
1001 MA) coupled with Mai Tai HP DeepSee lasers (Spectra Physics, Santa Clara, CA). The mounted  
1002 specimen was fixed through a magnet to the metal plate in the centre of the cutting bath filled  
1003 with degassed, room-temperature PBS with 0.1% sodium azide. A new blade was used for each  
1004 brain on the vibratome and aligned to be parallel to the leading edge of the specimen block.  
1005 Brains were imaged from the caudal end. The specimen was illuminated with 925 nm  
1006 wavelength light through a Zeiss 320 water immersion objective (NA = 1.0), with 250 mW light  
1007 power at objective. The two-photon images for red, green and blue channels were taken at 75 μm  
1008 below the cutting surface. To scan a full tissue section, individual tile images were acquired, and  
1009 the entire stage was moved between each tile. After an entire section was imaged, the x and y  
1010 stages moved the specimen to the vibratome, which cut a 100-μm section, and returned the  
1011 specimen to the objective for imaging of the next plane. The blade vibrated at 60 Hz and the  
1012 stage moved towards the blade at 0.5 mm per sec during cutting. Images from 140 sections were  
1013 collected to cover the full range of mouse brain at an x-y resolution of 0.35 μm per pixel. Upon  
1014 completion of imaging, sections were retrieved from the cutting bath and stored in PBS with  
1015 0.1% sodium azide at 4°C.

1016

1017 **fMOST imaging**

1018 All tissue preparation has been described previously (Gang et al., 2017). Following fixation, each  
1019 intact brain was rinsed three times (6 h for two washes and 12 h for the third wash) at 4°C in a  
1020 0.01 M PBS solution (Sigma-Aldrich Inc., St. Louis, US). Then the brain was subsequently  
1021 dehydrated via immersion in a graded series of ethanol mixtures (50%, 70%, and 95% (vol/vol)  
1022 ethanol solutions in distilled water) and the absolute ethanol solution three times for 2 h each at  
1023 4°C. After dehydration, the whole brain was impregnated with Lowicryl HM20 Resin Kits  
1024 (Electron Microscopy Sciences, cat.no. 14340) by sequential immersions in 50, 75, 100 and  
1025 100% embedding medium in ethanol, 2 h each for the first three solutions and 72 h for the final  
1026 solution. Finally, each whole brain was embedded in a gelatin capsule that had been filled with

1027 HM20 and polymerized at 50°C for 24 h.

1028 The whole brain imaging is realized using a fluorescence microscopic optical sectioning  
1029 tomography (fMOST) system. The basic structure of the imaging system is the combination of a  
1030 wide-field upright epi-fluorescence microscopy with a mechanic sectioning system. This system  
1031 runs in a wide-field block-face mode but updated with a new principle to get better image  
1032 contrast and speed and thus enables high throughput imaging of the fluorescence protein labeled  
1033 sample (manuscript in preparation). Each time we do a block-face fluorescence imaging across  
1034 the whole coronal plane (X-Y axes), then remove the top layer (Z axis) by a diamond knife, and  
1035 then expose next layer, and image again. The thickness of each layer is 1.0 micron. In each layer  
1036 imaging, we used a strip scanning (X axis) model combined with a montage in Y axis to cover  
1037 the whole coronal plane (Li et al., 2010). The fluorescence, collected using a microscope  
1038 objective, passes a bandpass filter and is recorded with a TDI-CCD camera. We repeat these  
1039 procedures across the whole sample volume to get the required dataset.

1040 The objective used is 40X WI with numerical aperture (NA) 0.8 to provide a designed optical  
1041 resolution (at 520 nm) of 0.35  $\mu\text{m}$  in XY axes. The imaging gives a sample voxel of 0.35 x 0.35  
1042 x 1.0  $\mu\text{m}$  to provide proper resolution to trace the neural process. The voxel size can be varied  
1043 upon difference objective. Other imaging parameters for GFP imaging include an excitation  
1044 wavelength of 488 nm, and emission filter with passing band 510-550 nm.

1045

#### 1046 **Full neuronal morphology reconstruction system**

1047 We developed Vaa3D, an open-source, cross-platform visualization and analysis system, for the  
1048 tasks of reconstructing massive neuronal morphologies. To efficiently and effectively deal with  
1049 the whole-mouse brain imaging data, we incorporated several enabling modules into Vaa3D,  
1050 such as TeraFly and TeraVR. TeraFly supports visualization and annotation of multidimensional  
1051 imaging data with virtually unlimited scales. The user can flexibly choose to work at a specific  
1052 region of interest (ROI) with desired level of detail (LoD). The out-of-core data management of  
1053 TeraFly allows the software to smoothly deal with terabyte-scale of data even on a portable  
1054 workstation with normal RAM size. Driven by virtual reality (VR) technologies, TeraVR is an  
1055 annotation tool for immersive neuron reconstruction that has been proved to be critical for  
1056 achieving precision and efficiency in morphology data production. It creates stereo visualization  
1057 for image volumes and reconstructions and offers an intuitive interface for the user to interact  
1058 with such data. TeraVR excels at handling various challenging yet constantly encountered data  
1059 situations during whole-brain reconstruction, such as the noisy, complicated, and weakly labeled  
1060 signals. The complete morphologies generated by using TeraVR are essential for a number of  
1061 downstream applications including cell profiling and categorization. Both TeraFly and TeraVR  
1062 are seamlessly integrated in Vaa3D and can be used combinedly and flexibly.

1063

#### 1064 **Full morphology reconstruction**

1065 At the beginning stage, we used NeuroLucida 360 (NL360, MBF Bioscience, USA) to trace  
1066 neurons. Since NL360 had a limitation to handle whole brain image data set, a portion of the  
1067 imaging data (200-300 images corresponding to a 200-300  $\mu\text{m}$  coronal brain section) was loaded  
1068 at a time to reconstruct neurons. In order to trace a single neuron such as a CLA cell at whole  
1069 brain level, a serial image stacks (>30 coronal brain sections) were made with a software called

1070 Biolucida Converter (MBF Bioscience, USA). Later, TeraVR was developed and integrated with  
1071 Vaa3D, which not only allowed us to handle whole brain image data set at once, but also  
1072 significantly improved the precision and efficiency in morphology reconstruction of single  
1073 neurons at whole brain level. For instance, the 3D relationship among intertwined axonal  
1074 segments could be visualized at various angles in the virtual space at a resolution not reached  
1075 before. Thus, many missing branches were recovered and mis-connected segments were  
1076 corrected for those cells reconstructed with NL360. At the later stage, neurons were traced using  
1077 Vaa3D-TeraVR directly.

1078 The *Gnb4+* claustral and L6PC neurons are particularly challenging to reconstruct, as each  
1079 neuron's axon projection covers a wide area and axons from different neurons are often  
1080 intermingled together. We often encountered two axon segments crossing or touching each other.  
1081 In most cases, it was not difficult to identify one to continue the tracing segment by comparing  
1082 the similarity between the parent and extending segments in their structural features including  
1083 thickness and tortuosity, bouton shape and size and density, and labeling condition, etc. In some  
1084 cases, however, two or multiple similar-looking segments were intertwined or bundled together  
1085 so closely that could not be separated even using Tera-VR. For these special cases, an extending  
1086 segment and its branches were kept if it was continued reaching all ends, or given up if it was  
1087 eventually connected to a main axonal stem that lead to another soma. A neuron was considered  
1088 fully reconstructed in the case that it was completed with all ends that typically had very well  
1089 labeled, enlarged boutons. Those neurons that were labeled too faintly to be confidently traced  
1090 were abandoned and excluded from this study. Finally, a QC-checking procedure was performed  
1091 by an experienced annotator using TeraVR by double checking the entire reconstruction of a  
1092 neuron, at a high magnification paying special attention to the proximal axonal part or a main  
1093 axonal trunk of an axon cluster where axonal collaterals often emerged and branches were more  
1094 frequently missed due to the local image environment being composed of crowded high  
1095 contrasting structures. Auto-refinement fits the tracing to the center of fluorescent signals as the  
1096 last step. The final reconstruction is a single tree without breaks, loops, multiple branches from a  
1097 single point, etc.

1098

### 1099 **Registration to CCF**

1100 We performed 3D registration from fMOST images (subject) to average mouse brain template of  
1101 CCFv3 (target). 1) fMOST images were first down-sampled by 64x64x16 (X, Y, Z) to roughly  
1102 match the size of the target brain. 2) 2D stripe-removal was then performed using frequency  
1103 notch filters. 3) A dozen or so matching landmark pairs between subject and target were  
1104 manually added to ensure correct affine transformation that approximately aligned the  
1105 orientation and scales. 4) Affine transformation was applied to minimize the sum of squared  
1106 difference (SSD) of intensity between target and subject images. 5) Intensity was normalized by  
1107 matching the local average intensity of subject image to that of target image. 6) A candidate list  
1108 of landmarks across CCF space was generated by grid search (grid size=16 pixels). Then the  
1109 BrainAligner software searched corresponding landmarks in the subject image and performed  
1110 local alignment.

1111

### 1112 **Quantitative morphology data analysis**

1113 Pre-processing of SWC files:

1114 SWC files were processed and examined with Vaa3D plugins to ensure topological correctness:  
1115 sorted single tree with root node as soma. Terminal branches < 10 microns were pruned to  
1116 remove artifacts. SWC files were resampled with a step size of 5 microns.

1117 Quantification of axon projection patterns:

1118 To analyze the distribution and amount of axon in brain-wide targets following registration to the  
1119 CCFv3, we used a manually curated set of 316 non-overlapping structures at a mid-ontology  
1120 level that are most closely matched in size or division (named “summary structures”, second tab  
1121 in **Table S4**). Ipsi- and contra-lateral sides of brain regions were calculated separately. Brain  
1122 regions with non-zero levels in less than 3 neurons were excluded from further analysis.

1123 Morphological features:

1124 Axonal and dendritic morphological features, defined according to L-measurement (Scorcioni et  
1125 al., 2008), were calculated using Vaa3D plugin “global\_neuron\_feature”. Selected features  
1126 include:

1127 (Axon global)

1128 'Overall Width', 'Overall Height', 'Overall Depth', 'Total Length', 'Euclidean Distance',  
1129 'Max Path Distance', 'Number of Branches'.

1130 (Axon local)

1131 'Total Length', 'Number of Branches'.

1132 (Dendrite)

1133 'Overall Width', 'Overall Height', 'Overall Depth', 'Total Length', 'Max Euclidean  
1134 Distance', 'Max Path Distance', 'Number of Branches', 'Max Branch Order'.

1135 Local axons were defined as axon arbors within 200 microns from the somata. Local axons and  
1136 dendrites were rotated based on principle component analysis (PCA) so dimensions were aligned  
1137 with the largest to smallest spans. Then shifting was performed to localize somata at the origin of  
1138 coordinates.

1139 Steps of clustering-based cell type classification

1140 Data normalization: Morphological features were normalized by the mean and standard  
1141 variation in a feature-wise manner. Projection pattern features were normalized by the total  
1142 length per 100  $\mu\text{m}$  in a sample-wise manner and scaled by logarithm. Soma locations were  
1143 flipped to the same hemisphere.

1144 Similarity metrics: For each feature set, we first calculated the Euclidean distance matrix. Then a  
1145 ranked K-nearest neighbor (KNN) matrix was created. We then applied the Shared Nearest  
1146 Neighbor (SNN) approach to measure the similarity between each pair of samples  $x_i$  and  $x_j$ . The  
1147 SNN metric was defined as the maximum average rank among their common neighbors:

1148 
$$S(x_i, x_j) = \max_{v \in NN(x_i) \cap NN(x_j)} \left\{ k - \frac{1}{2} [rank_{NN(x_i)}(v) + \frac{1}{2} (rank_{NN(x_j)}(v))] \right\}$$

1149 Similarity scores were set as 0 for pairs with non-overlapping KNN sets and a weighted SNN  
1150 graph is created.

1151 *Co-clustering analysis:* Co-clustering matrix for each feature set was calculated by iterative  
1152 random sampling. During each iteration, 95% of samples were randomly selected to create an  
1153 SNN graph. We then applied the “Fast-greedy” community detection algorithm using python  
1154 package “python-igraph” for clustering assignment. For each pair of samples, the co-clustering  
1155 score was defined as the times of co-clustering normalized by the iterations of co-occurring.  
1156 Resampling was performed 5,000 times to reach saturation. The overall co-clustering matrix is a  
1157 weighted average of the four feature sets. Agglomerative clustering was performed to the co-  
1158 clustering matrix to get clusters.

1159 *Outlier removal:* Outliers were detected by comparing the Euclidean distance between a sample  
1160 and the other samples with the same cluster identity. We used overall within-cluster distance as  
1161 the background distribution. Samples with significantly higher (one-sided Mann-Whitney test)  
1162 within-cluster distance were filtered out as outliers. Agglomerative clustering was performed for  
1163 the remaining co-clustering matrix. This process iterated until no new outlier could be detected.

1164 *Characterization of cell types:* For each feature set, we performed two-sided Mann-Whitney  
1165 tests: claustrum vs. cortical neurons; each cluster vs. other clusters. P-values were adjusted by  
1166 Bonferroni correction.

1167

## 1168 **Anterograde tracing and retrograde labeling**

1169 For anterograde projection mapping, we injected AAV2/1-pCAG-FLEX-EGFP-WPRE-pA (Oh  
1170 et al., 2014) into CLA, SSs or SS<sub>p</sub> of Gnb4-IRES2-Cre or Gnb4-IRES2-CreERT2 mice at P37-  
1171 P65 respectively. Stereotaxic injection procedures were performed as previous described (Oh et  
1172 al., 2014) and stereotaxic coordinates used for each experiment can be found in the data portal.  
1173 For the Gnb4-IRES2-CreERT2 mice, tamoxifen induction was conducted 1 week post injection  
1174 at full dose (0.2 mg/g body weight) for 5 consecutive days. Mice survived 3 weeks (or 4 weeks  
1175 for the tamoxifen-induced mice) post injection, and brains were perfused and collected for  
1176 TissueCyte imaging.

1177 For retrograde labeling, we injected AAV2-retro-EF1a-dTomato (Tervo et al., 2016) into ORBl,  
1178 ACA, MOp, or VISpl of Gnb4-IRES2-CreERT2 and Cux2-CreERT2 mice crossed to Ai140 or  
1179 Ai148. We additionally injected RVΔGL-Cre (Chatterjee et al., 2018) or CAV2-Cre (Hnasko et  
1180 al., 2006) into MOp, SSs, or VISpm of Ai14 mice. We FACS-sorted and collected RFP+ or  
1181 RFP+/GFP+ cells from CLA and surrounding cortical regions. Stereotaxic injection procedures  
1182 were performed as previous described (Oh et al., 2014). Mice were injected at P40 or older, with  
1183 16-31 days survival post-injection.

1184

## 1185 **Single-cell RNA-sequencing**

1186 Cells from transgenic mice or transgenic mice injected with retrograde tracers were collected by  
1187 microdissection of AI, CLA, ENTl, MOp, ORB, PL-ILA, SS<sub>p</sub>, SSs, TEa-PERl-ECT, and VISp.  
1188 Single-cell suspensions were created and cells were collected using fluorescence activated cell  
1189 sorting (FACS). FACS gates were selective for cells with fluorescent protein expression from  
1190 transgenic and/or viral reporters.

1191 Cells were then frozen at -80°C, and were later processed for scRNA-seq using the SMART-Seq  
1192 v4 method (Tasic et al., 2018). After sequencing, raw data was quantified using STAR v2.5.3

1193 and were aligned to both a Ref-Seq transcriptome index for the mm10 genome, and a custom  
1194 index consisting of transgene sequences. PCR duplicates were masked and removed using STAR  
1195 option ‘bamRemoveDuplicates’. Only uniquely aligned reads were used for gene quantification.  
1196 Gene read counts were quantified using the summarizeOverlaps function from R  
1197 GenomicAlignments package using both intronic and exonic reads, and QC was performed as  
1198 described in (Tasic et al., 2018).

1199 Clustering was performed using house developed R package scrattch.hicat (available via github  
1200 <https://github.com/AllenInstitute/scrattch.hicat>). In addition to classical single-cell clustering  
1201 processing steps provided by other tools such as Seurat, this package features automatically  
1202 iterative clustering by making finer and finer splits while ensuring all pairs of clusters, even at  
1203 the finest level, are separable by fairly stringent differential gene expression criteria. The  
1204 package also performs consensus clustering by repeating iterative clustering step on 80%  
1205 subsampled set of cells 100 times, and derive the final clustering result based on cell-cell co-  
1206 clustering probability matrix. This feature enables us to both fine tune clustering boundaries and  
1207 to assess clustering uncertainty. One critical criterion that determines the clustering resolution is  
1208 the minimal differential gene expression (DGE) requirement between all pairs of clusters. Using  
1209 stringent DGE requirement results in fewer clusters with more prominent differences between  
1210 clusters, while using more relaxed DGE expression result in more clusters captured by more  
1211 subtle differences. For the whole cortical and hippocampal dataset with ~75,000 cells, we used  
1212 the standard DGE requirement as in (Tasic et al., 2018). More specifically, q1.th = 0.5 (minimal  
1213 fraction of cells in a given cluster that express the positive markers), q.diff.th=0.7 (normalized  
1214 differences in fraction of cells expressing the positive markers between the foreground and  
1215 background cluster, maximal value is 1), and de.score.th=150 (overall assessment of the  
1216 statistical significance of all DGE genes). To capture more continuous differences between cell  
1217 types with more subtle differences, for the isolated cells from the Car3 subclass, we used the  
1218 relaxed DGE criterial: q1.th = 0.5, q.diff.th=0.5, de.score.th = 100.

1219



1220 **Supplemental Information**

1221

1222 **Table S1.** Transgenic mice used for the generation of fMOST imaging datasets, including main  
1223 metadata information and tamoxifen dosing (see **Methods**) for sparse labeling.

1224 **Table S2.** List of reconstructed CLA cells and L6PCs, with each neuron's soma location 3D  
1225 coordinates after registration to CCF.

1226 **Table S3.** Dendritic and axonal morphological features – quantitative values for each neuron.

1227 **Table S4.** Single neuron projection matrix used for clustering analysis. In a separate tab, a  
1228 complete list of all "Summary Structures" in CCFv3 ontology is shown, with the full name and  
1229 acronym for each structure/region.

1230 **Table S5.** The 1,997 Car3 IT subclass cells for scRNA-seq analysis, with relevant metadata  
1231 including retrograde labeling informatoin.

1232

1233 **Figure S1.** Sparse neuronal labeling in additional Cre lines. MC, Martinotti cells. CA1 OLM,  
1234 OLM neurons in hippocampal CA1.

1235 **Figure S2.** CCF registration workflow. Pipeline of 3D registration from fMOST image (subject)  
1236 to average mouse brain template of CCFv3 (target). Numbers below each panel indicate the pixel  
1237 sizes in the order of X\*Y\*Z. See **Methods** for explanation of each step.

1238 **Figure S3.** *Gnb4* expression in claustrum, endopiriform nucleus and cortex sampled through the  
1239 entire anterior-posterior span (from ORB to TEa). *Gnb4* gene in situ hybridization (ISH) coronal  
1240 image planes are shown side-by-side with the corresponding CCF reference plates.

1241 **Figure S4.** Top-down, coronal and sagittal views of each full CLA neuronal morphology shown  
1242 within the CCF 3D reference space (with CLA region highlighted). Color scheme: Soma in  
1243 green, dendrite in magenta, and axon in black.

1244 **Figure S5.** Top-down, coronal and sagittal views of each full L6PC neuronal morphology shown  
1245 within the CCF 3D reference space (with CLA region highlighted). Color scheme: Soma in  
1246 green, dendrite in magenta, and axon in black.

1247 **Figure S6.** Differential features between neighboring cell clusters, grouped by feature sets:  
1248 projection pattern, soma location, axon morphological features and dendritic morphological  
1249 features. Dendrogram was based on co-clustering matrix. Statistical tests were performed at each  
1250 split of the tree structure. Features with the lowest p-values were selected and labeled at the  
1251 branch with higher levels. Only features with p-values < 0.1 were selected.

1252 **Figure S7.** Pie charts showing the composition of each computationally derived cluster by  
1253 manually annotated cell types, bi- or ipsilateral projection, brain id, soma locations and axon  
1254 projection targets.

1255

1256 **Movie S1.** Whole-brain fMOST dataset (down-sampled) of a *Cux2-CreERT2;Ai166* brain.

1257 **Movie S2.** Whole-brain fMOST dataset (down-sampled) of a *Plxnd1-CreER;Ai166* brain.

1258 **Movie S3.** Whole-brain fMOST dataset (down-sampled) of a *Fezf2-CreER;Ai166* brain.

- 1259 **Movie S4.** Whole-brain fMOST dataset (down-sampled) of a Pvalb-T2A-CreERT2;Ai166 brain.
- 1260 **Movie S5.** Whole-brain fMOST dataset (down-sampled) of a Gnb4-IRES2-  
1261 CreERT2;Ai140;Ai82 brain.
- 1262 **Movie S6.** Whole-brain fMOST dataset (down-sampled) of a Slc6a4-CreERT2;Ai166 brain.
- 1263 **Movie S7.** Whole-brain fMOST dataset (down-sampled) of a Tnnt1-IRES2-  
1264 CreERT2;Ai140;Ai82 brain.
- 1265 **Movie S8.** Whole-brain fMOST dataset (down-sampled) of a Vipr2-IRES2-Cre-neo;Ai166 brain.
- 1266 **Movie S9.** CCF-Registered image dataset of Gnb4-IRES2-CreERT2;Ai140;Ai82 brain #17109.
- 1267 **Movie S10.** CCF-Registered image dataset of Gnb4-IRES2-CreERT2;Ai140;Ai82 brain #17781.
- 1268 **Movie S11.** CCF-Registered image dataset of Gnb4-IRES2-CreERT2;Ai140;Ai82 brain #17782.
- 1269 **Movie S12.** CCF-Registered image dataset of Gnb4-IRES2-CreERT2;Ai140;Ai82 brain  
1270 #236174.
- 1271
- 1272

**A**

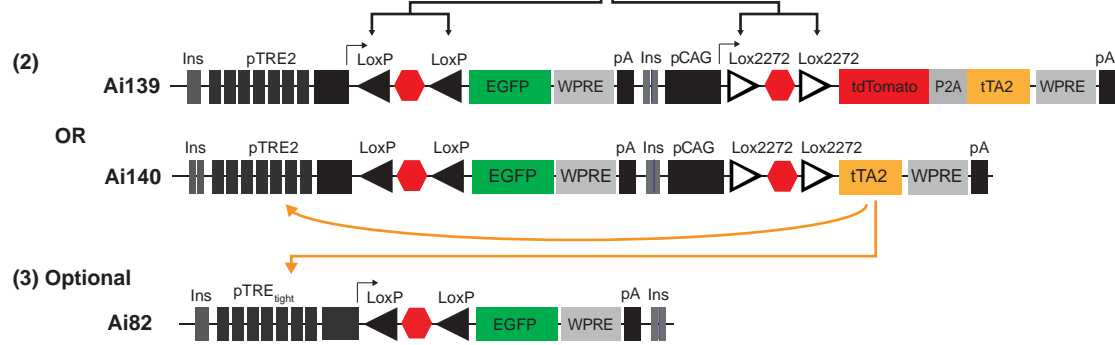

**B**

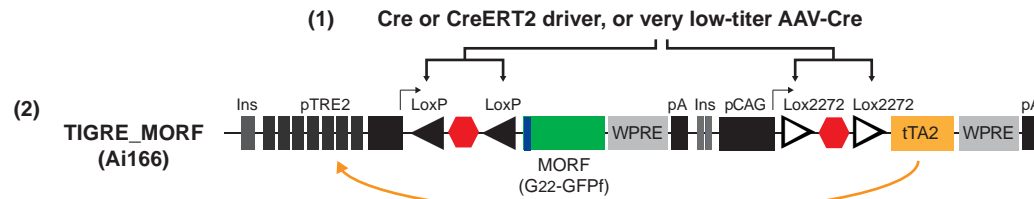

**C** Ai139 + AAV PHP.eB pSyn-CreERT2

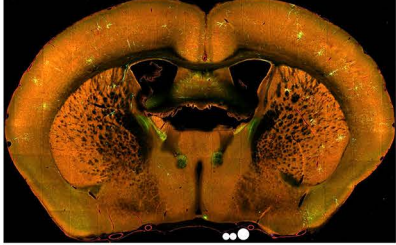

**D** Tnnt1-IRES2-CreERT2;Ai140

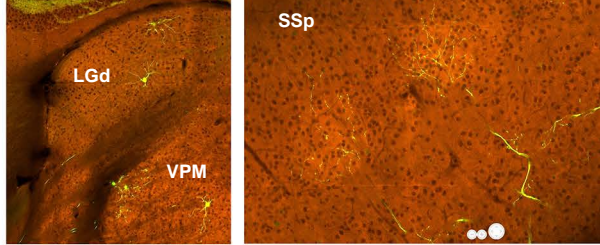

**E** Gnb4-IRES2-CreERT2;Ai140;Ai82

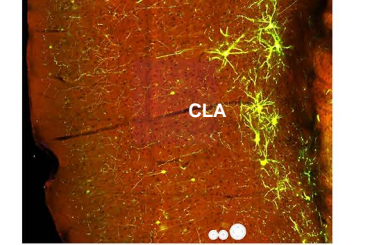

**F** Ctgf-T2A-dgCre;Ai166

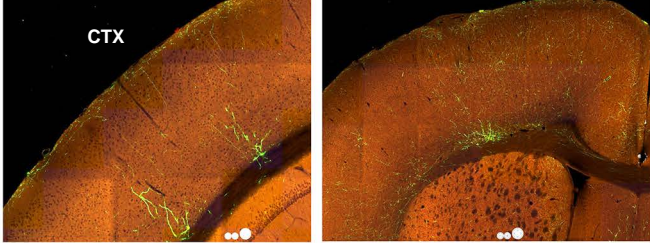

**G** Cux2-CreERT2;Ai166

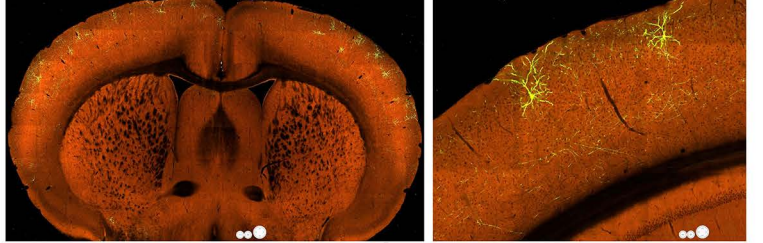

**H** Fezf2-CreER;Ai166

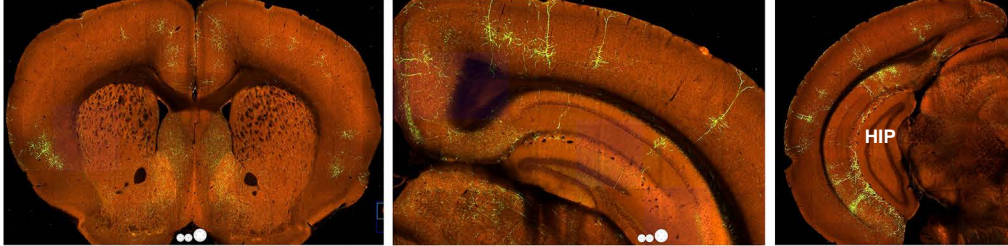

**I** Slc6a4-CreERT2\_EZ13;Ai166

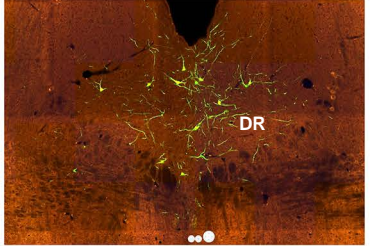

**J** Pvalb-T2A-CreERT2;Ai166

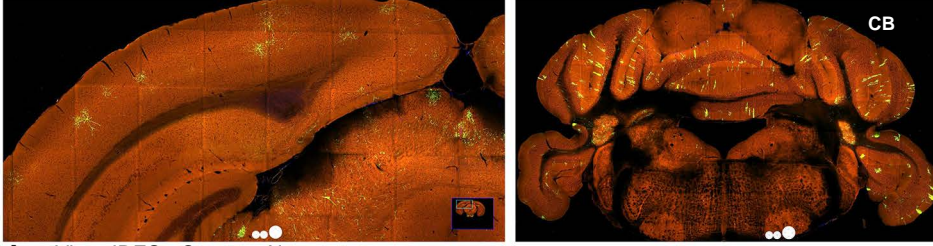

**K** Th-Cre;Ai166

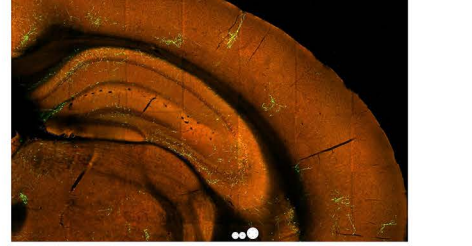

**L** Vipr2-IRES2-Cre-neo;Ai166

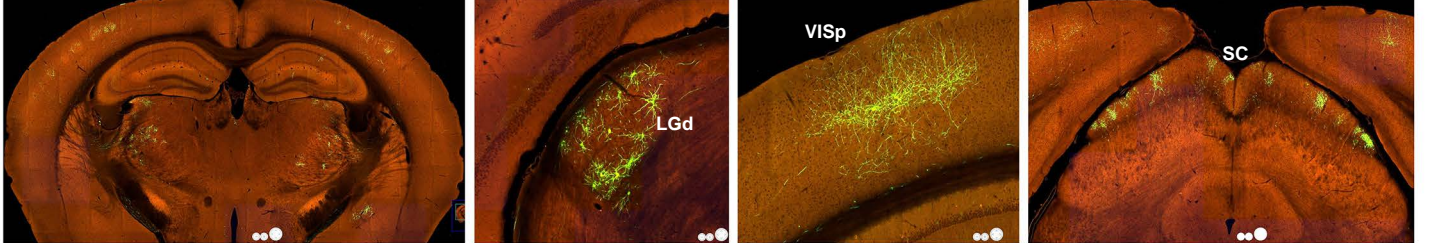

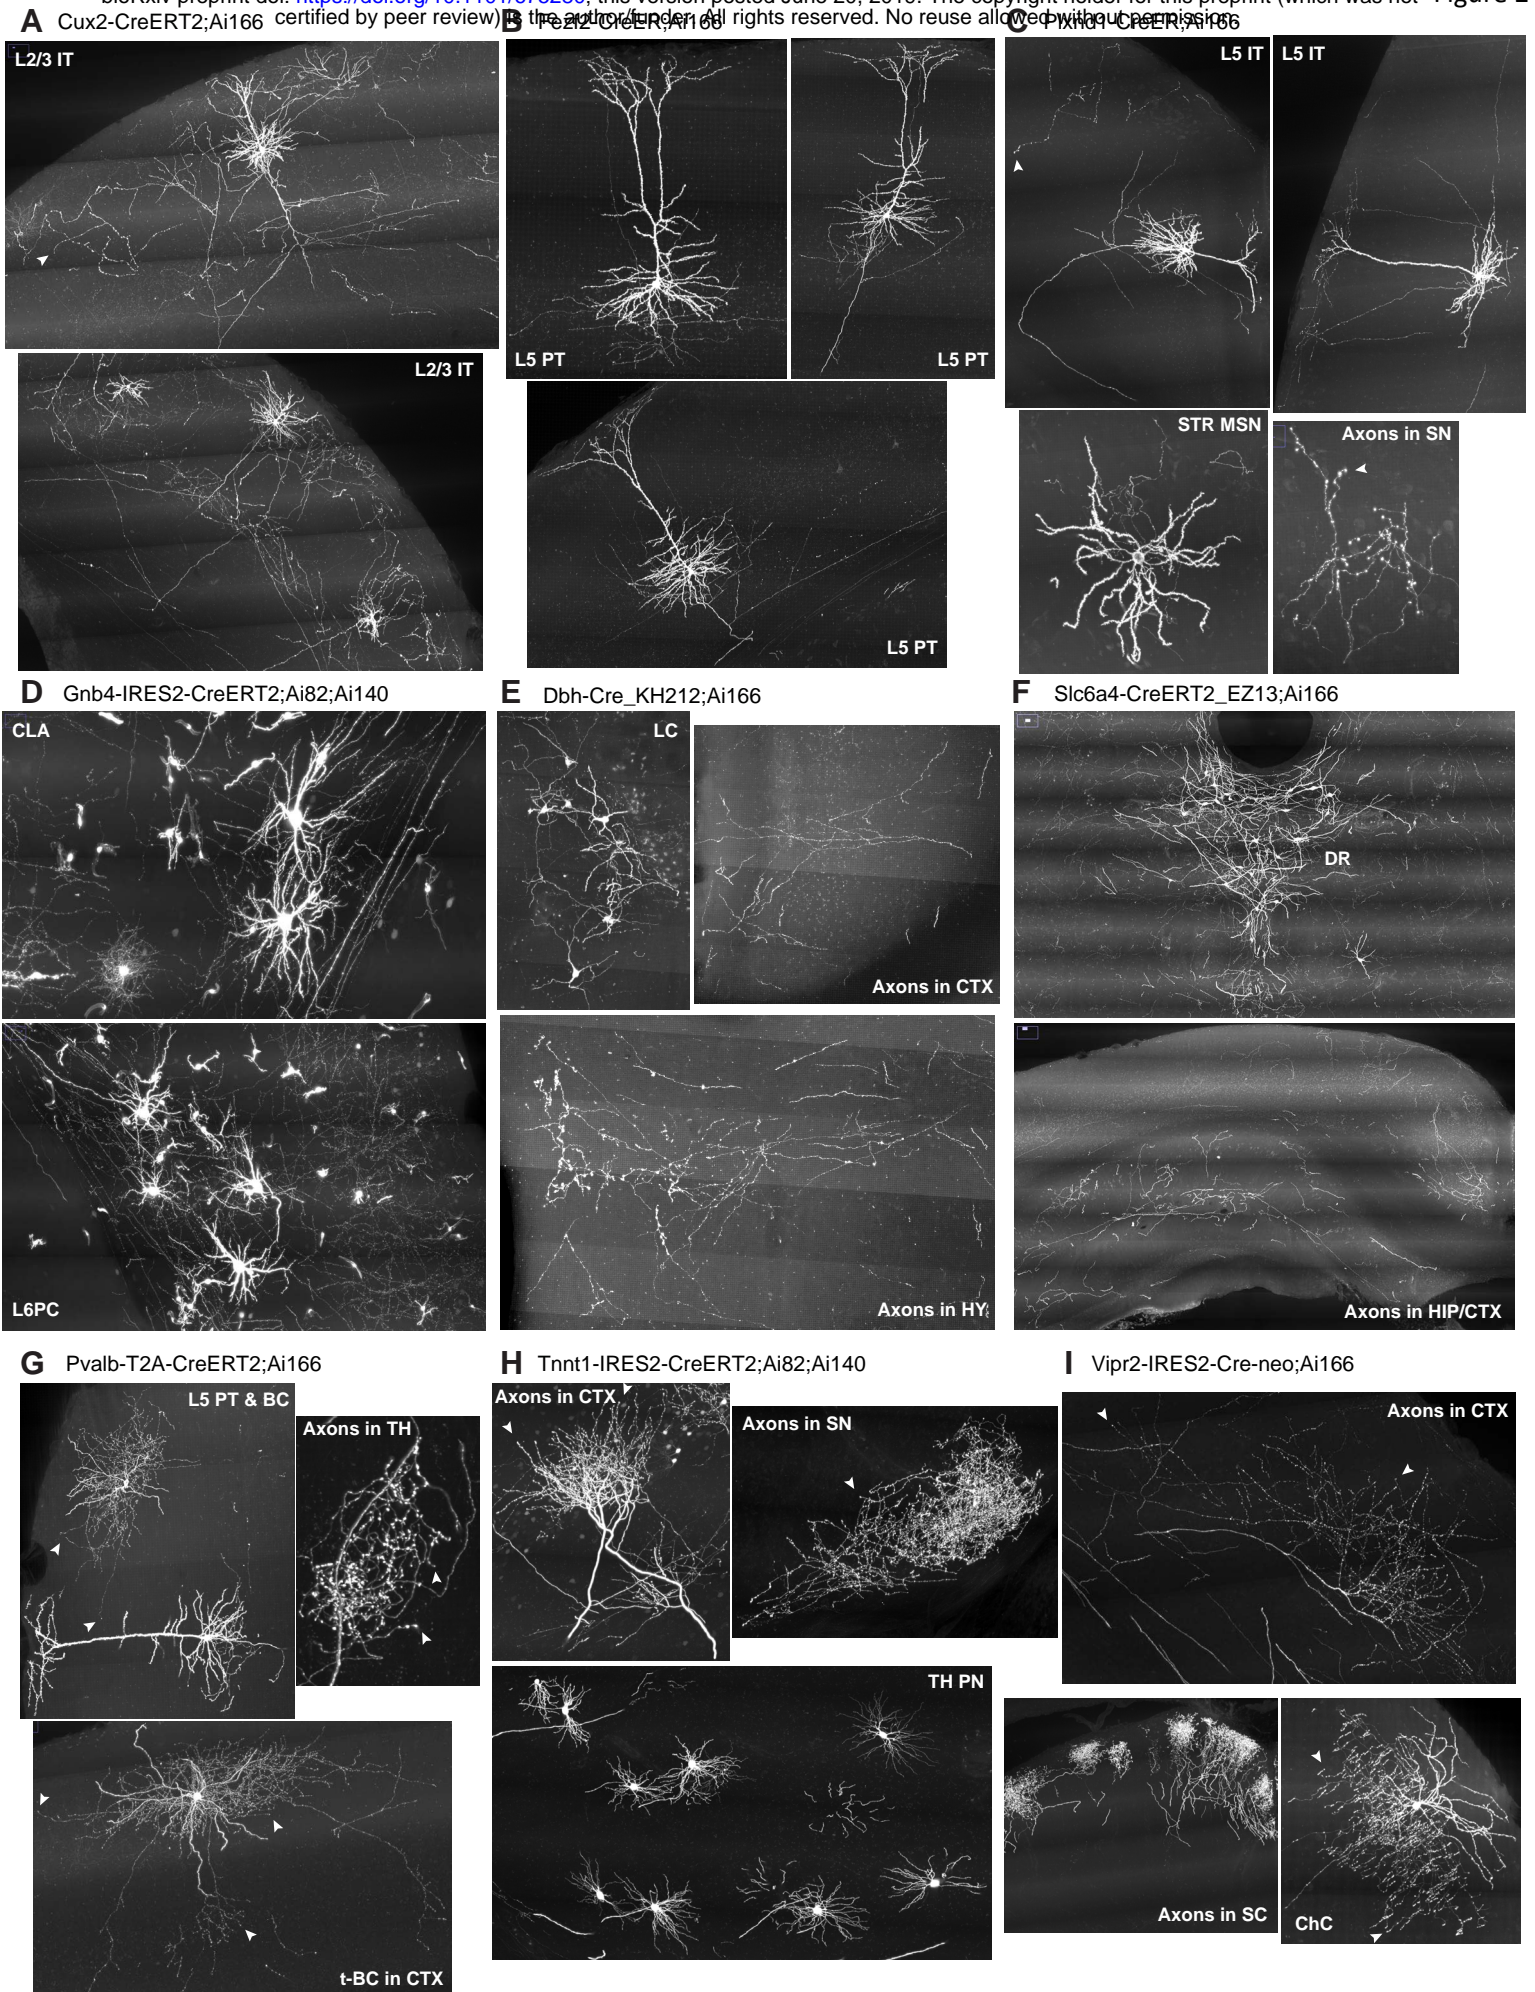

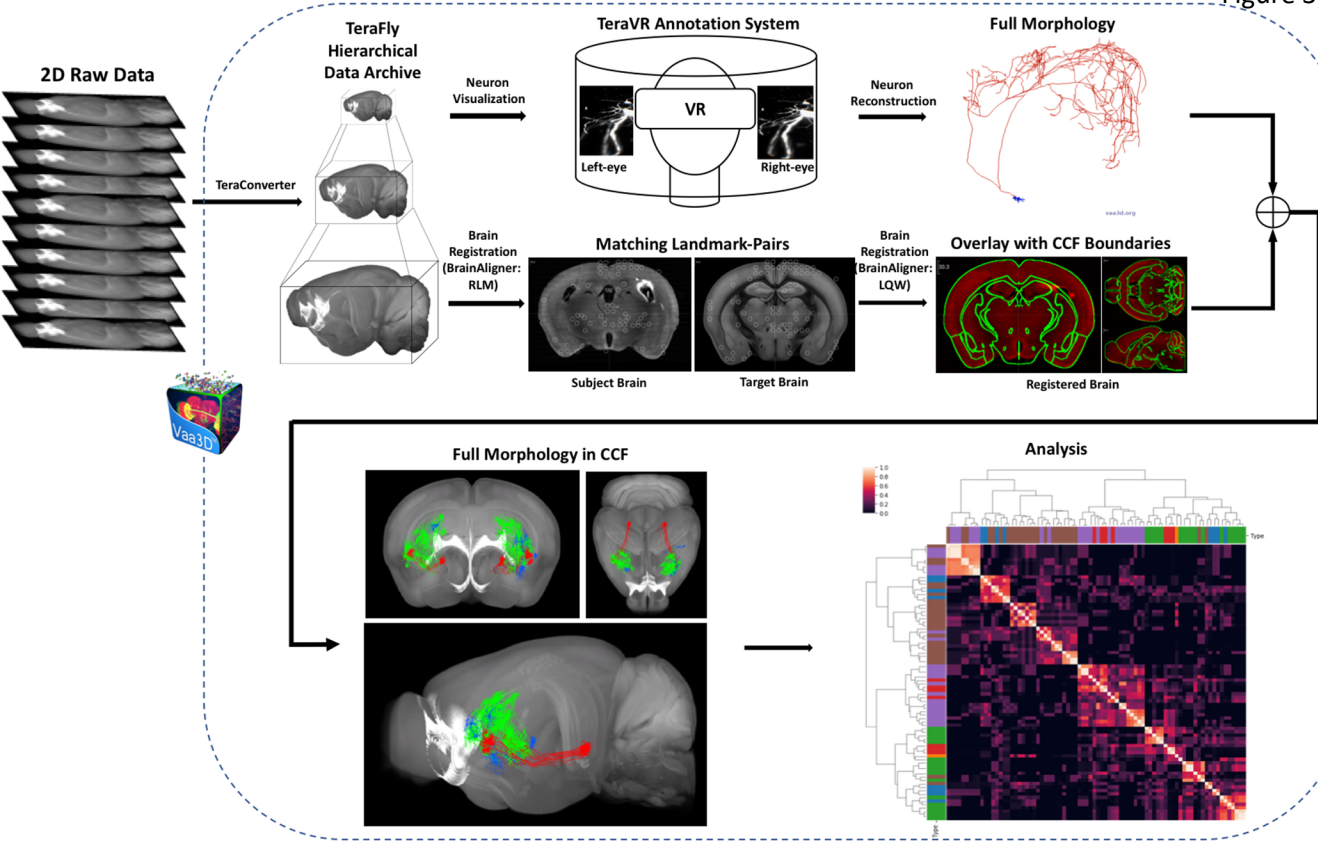

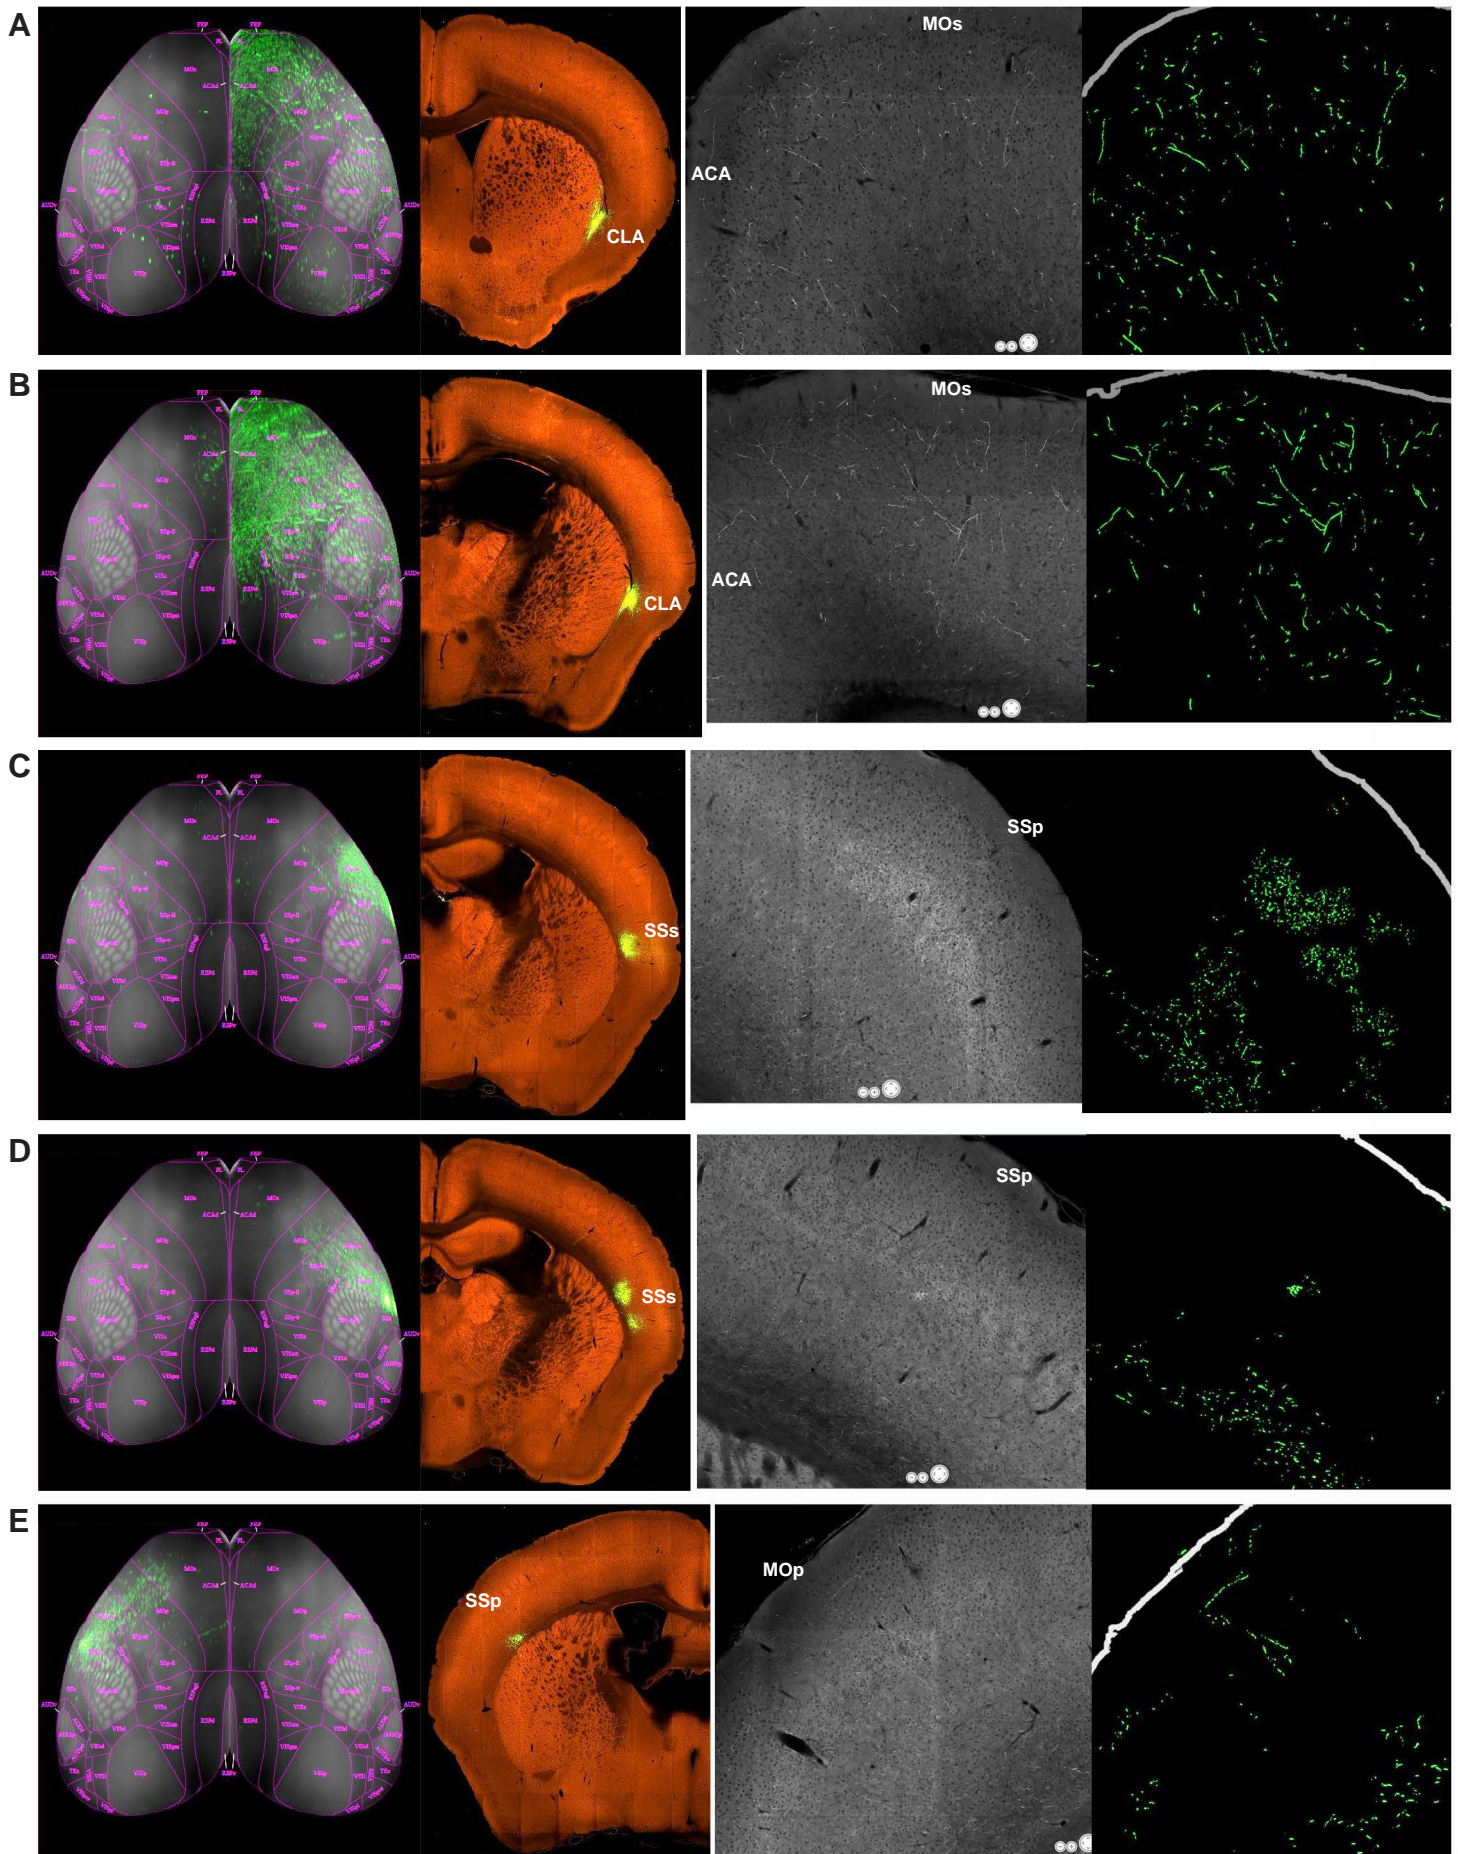

## A Soma locations

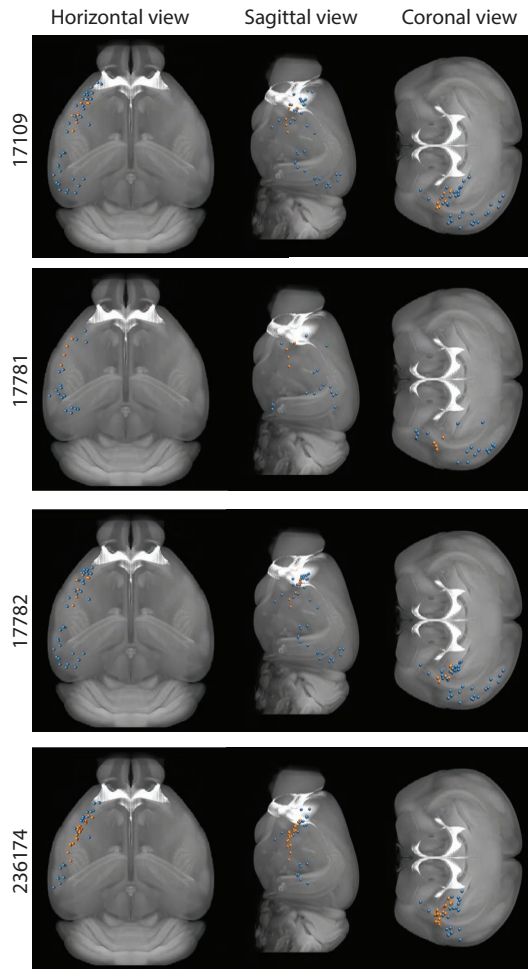

## B Dendritic features

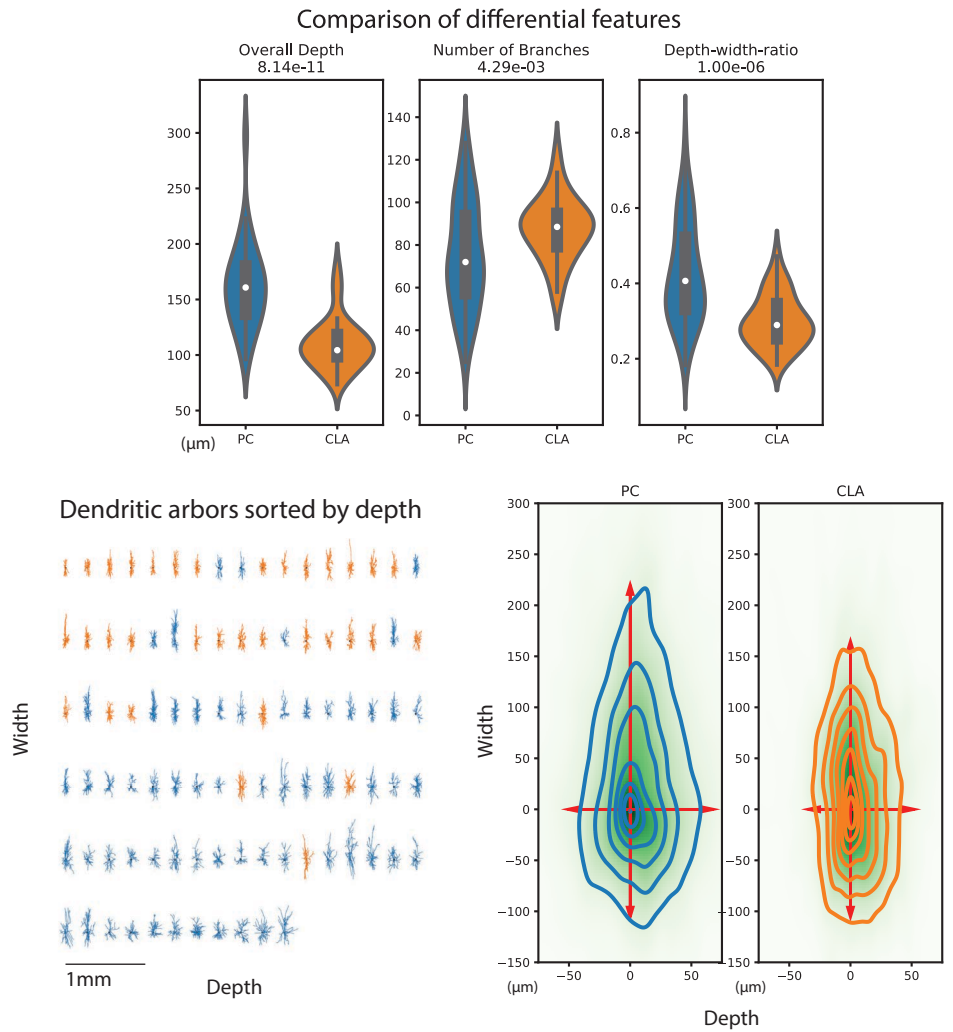

## C Axon features

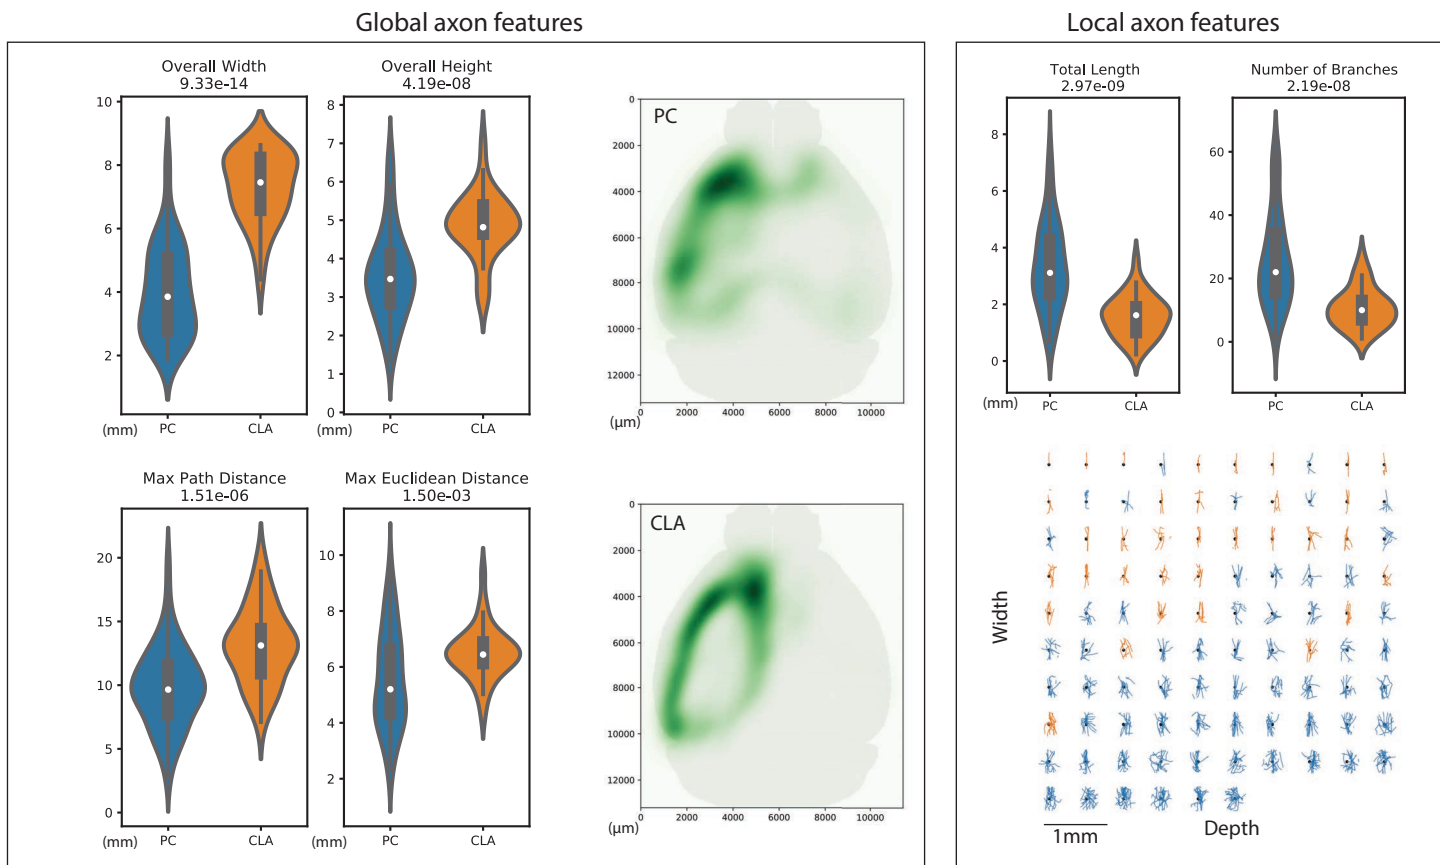

A

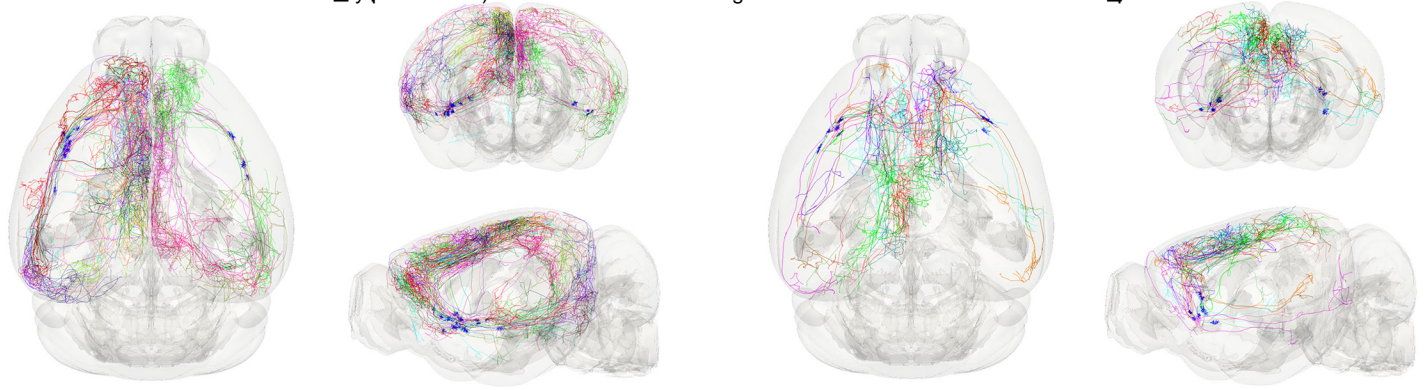

CLA\_II-ipsi

CLA\_II-bi

B

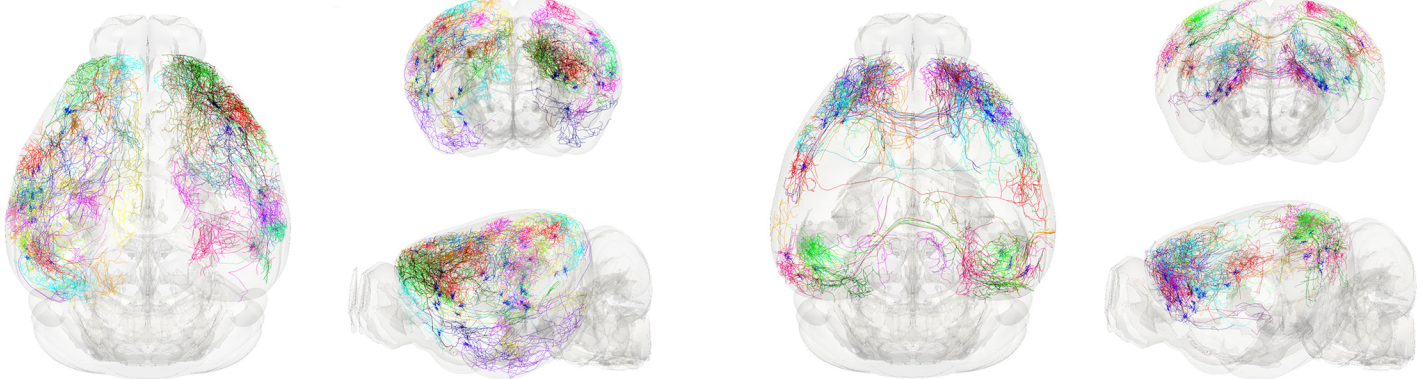

PC\_ipsi

PC\_bi

C

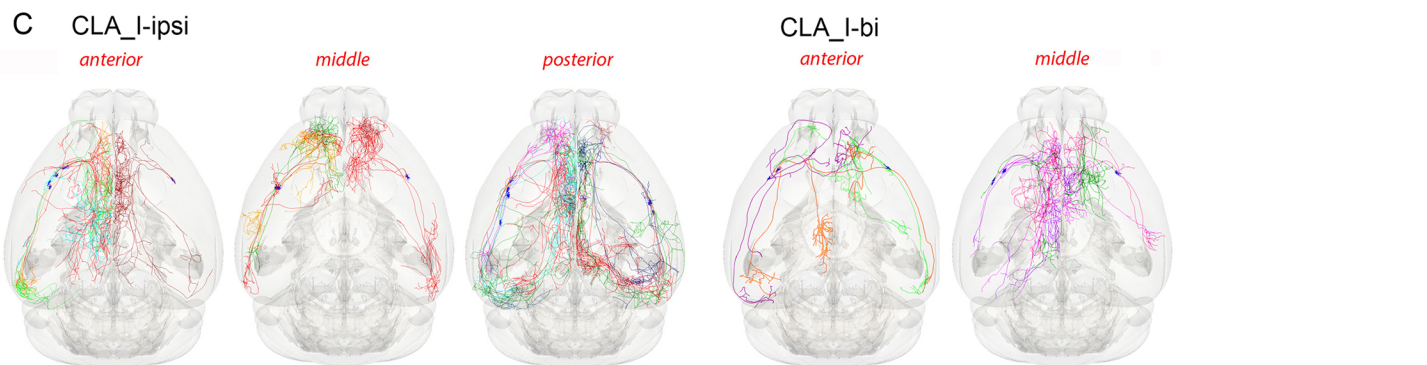

CLA\_I-ipsi

CLA\_I-bi

anterior

middle

posterior

anterior

middle

D

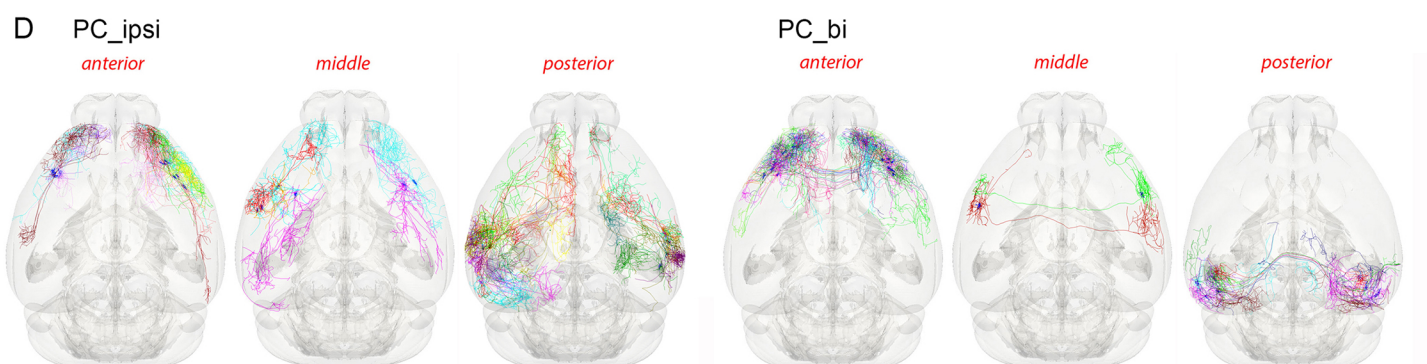

PC\_ipsi

PC\_bi

anterior

middle

posterior

anterior

middle

posterior



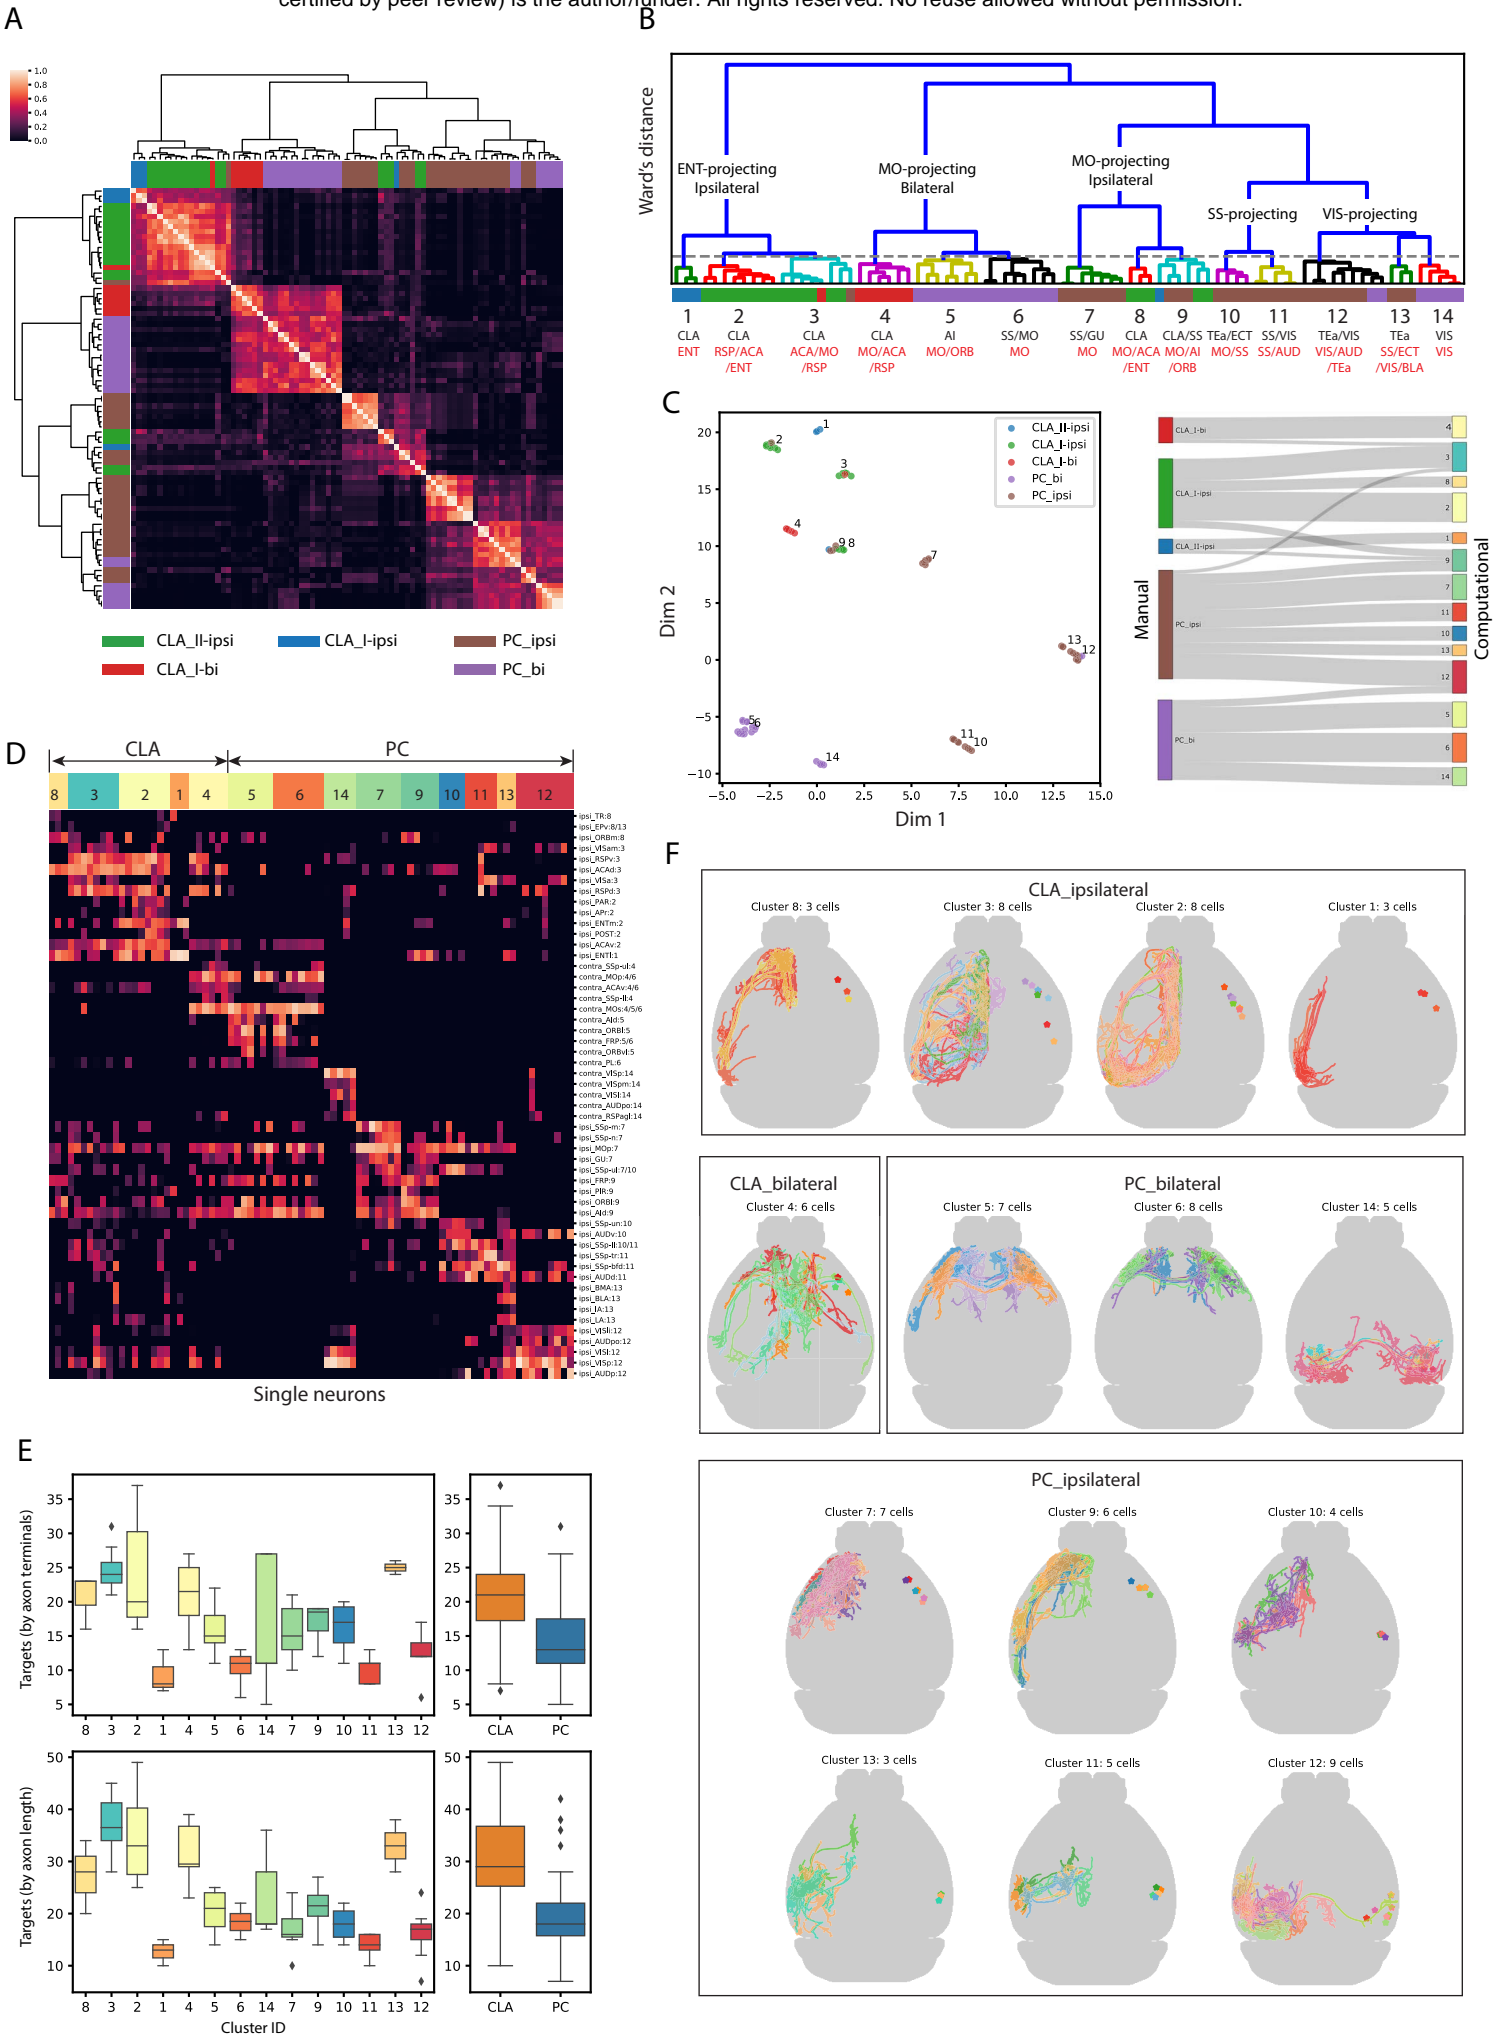

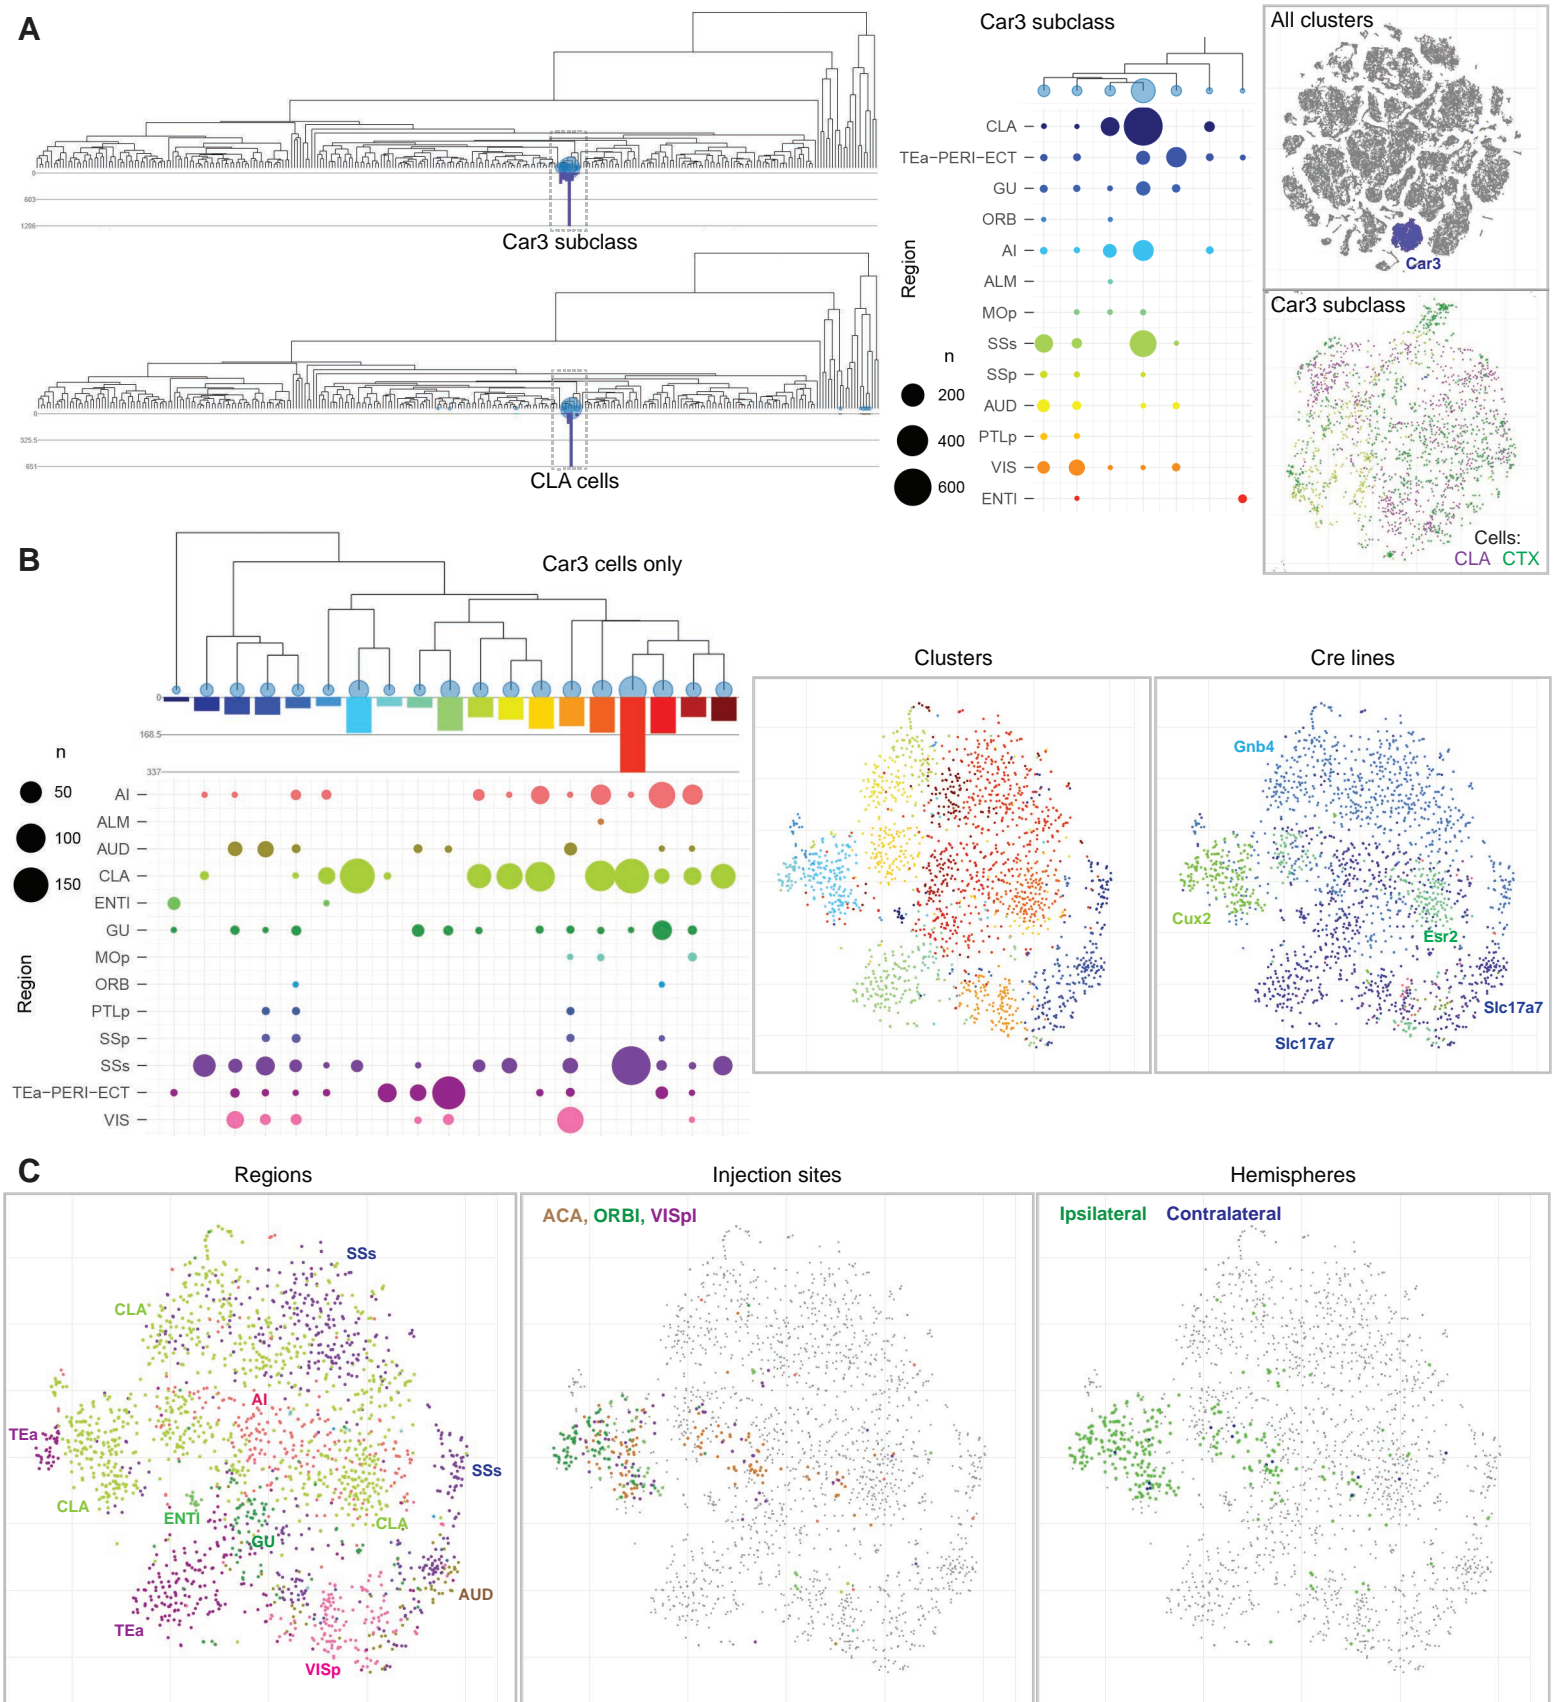

**A** Nxp4-T2A-CreERT2;Ai166

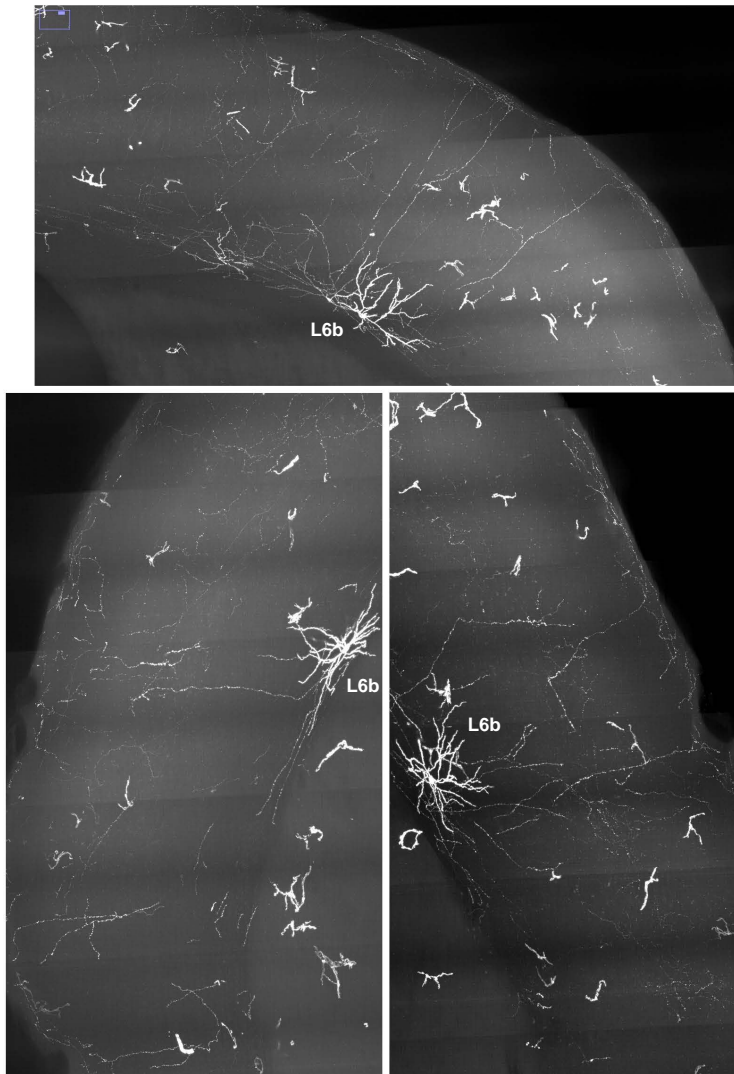

**B** Sst-Cre;Ai166

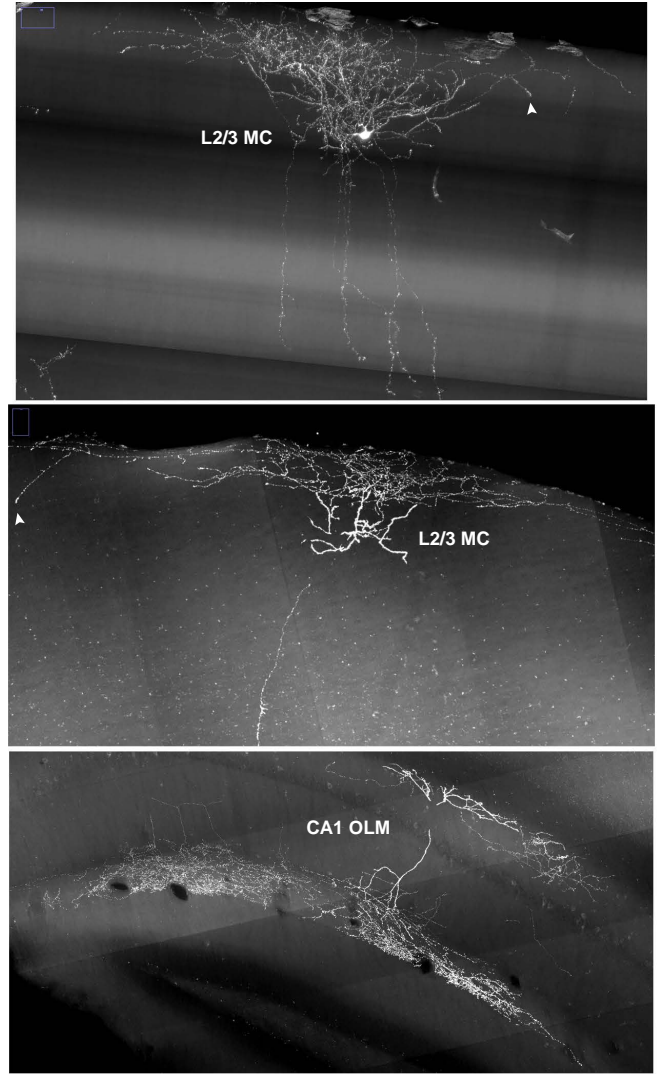

Figure S2

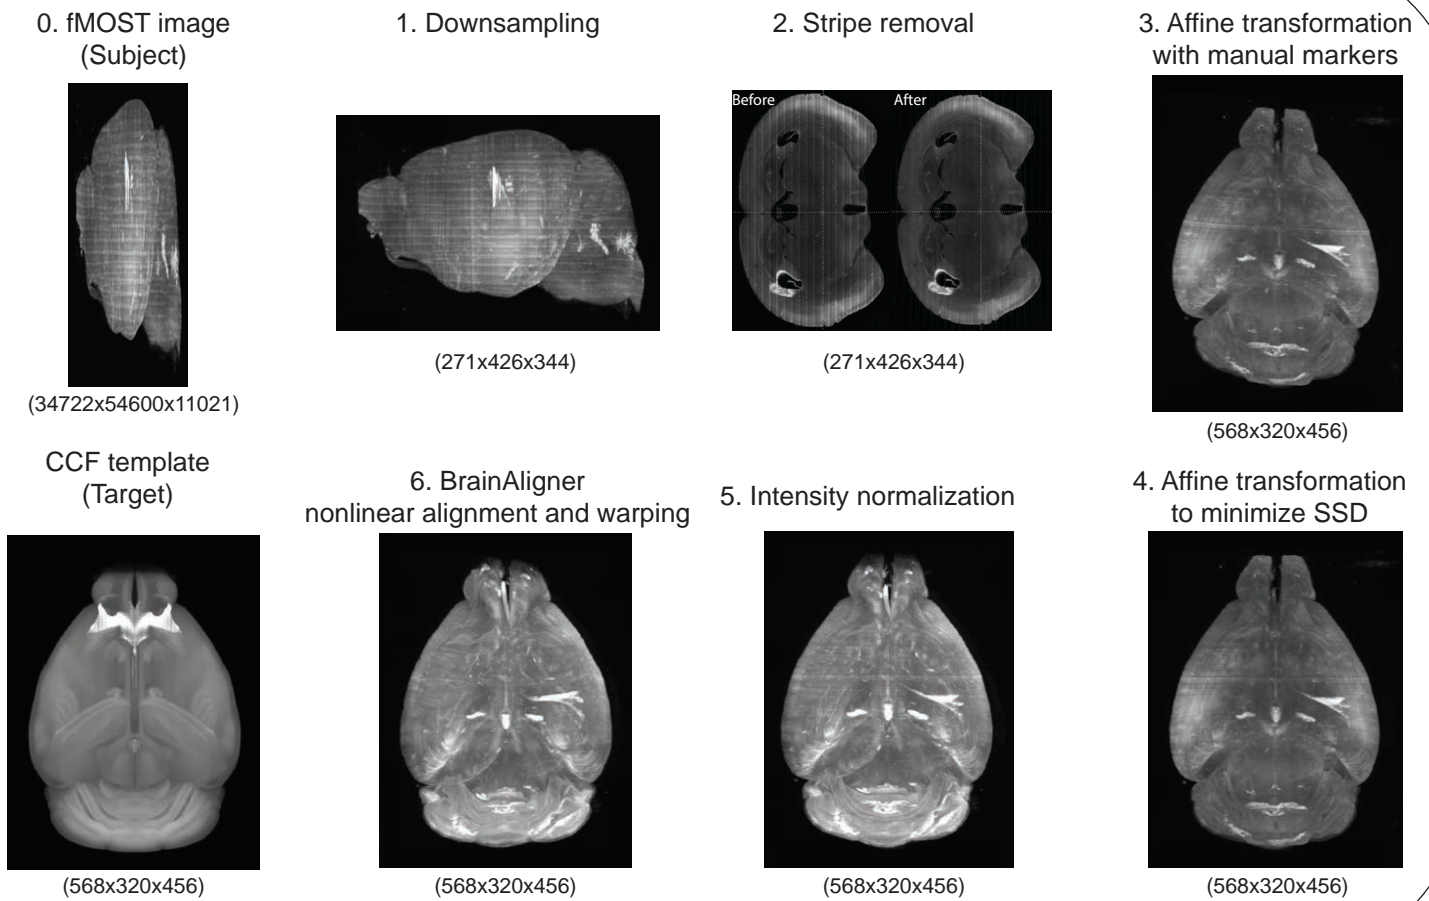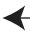

Figure S3

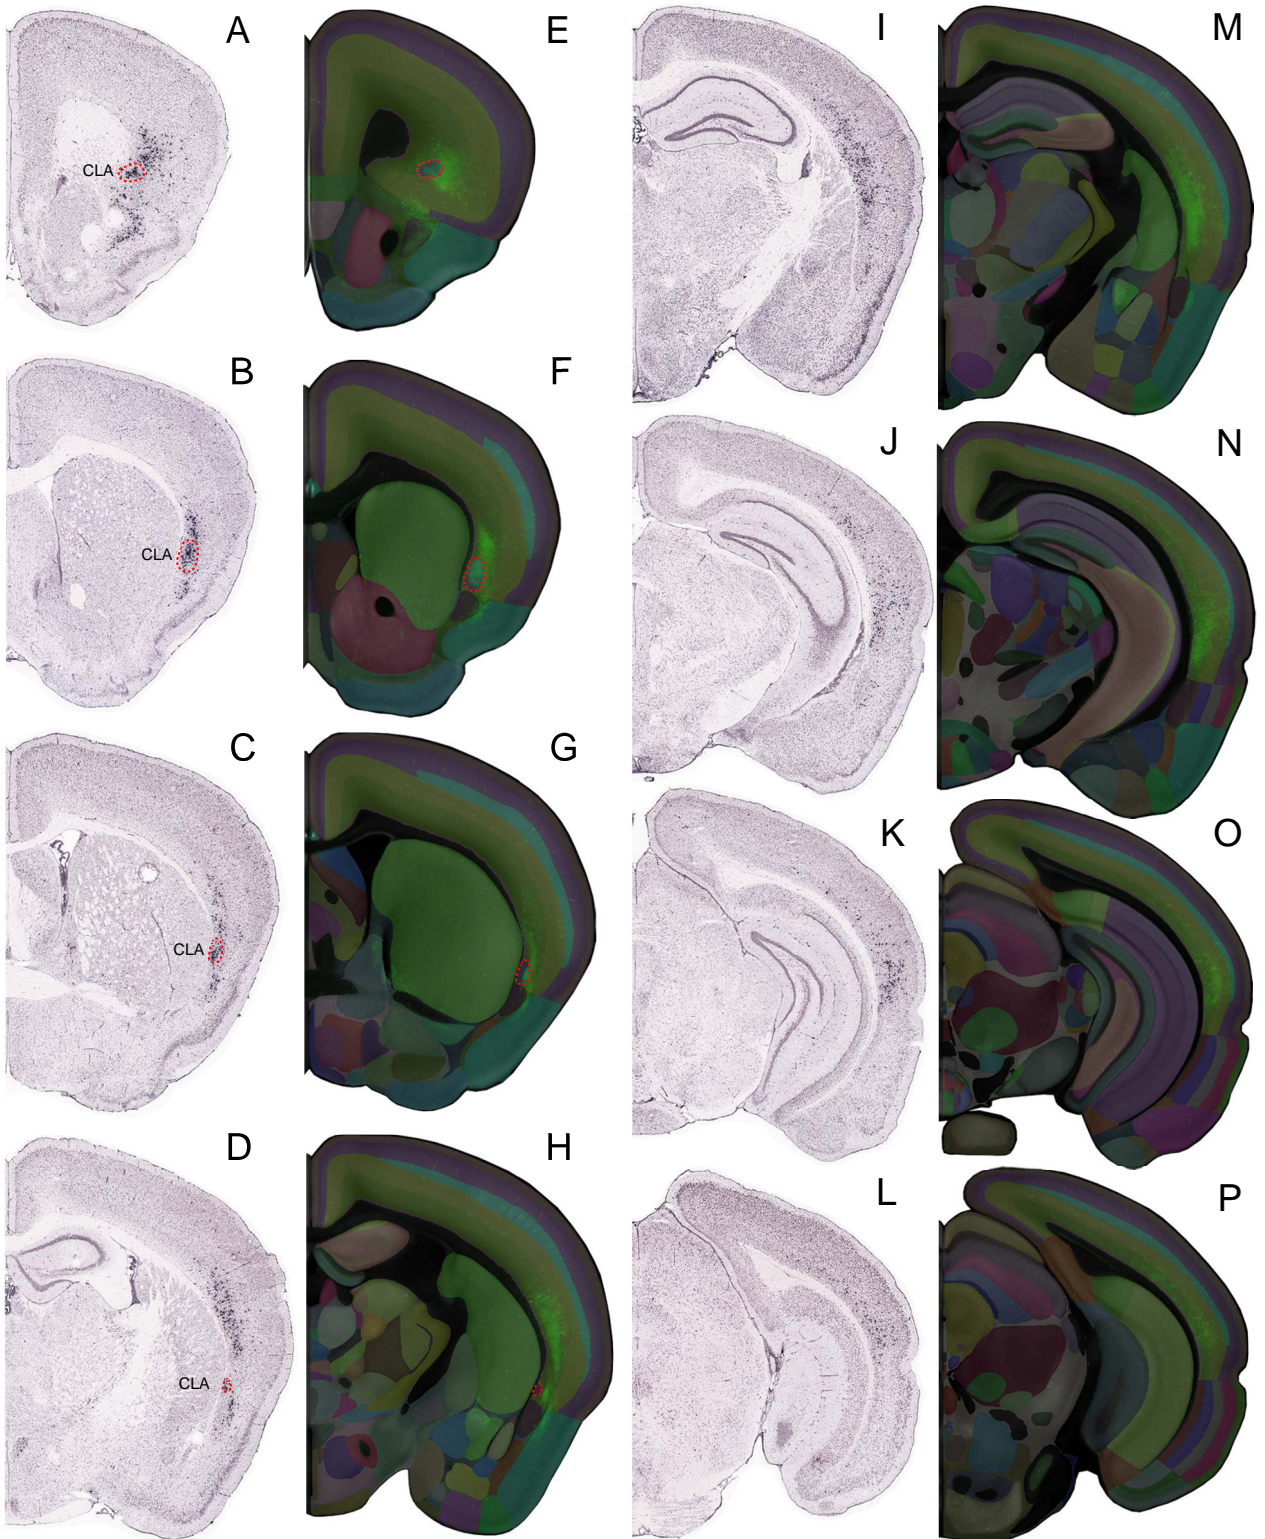

CLA\_bilateral

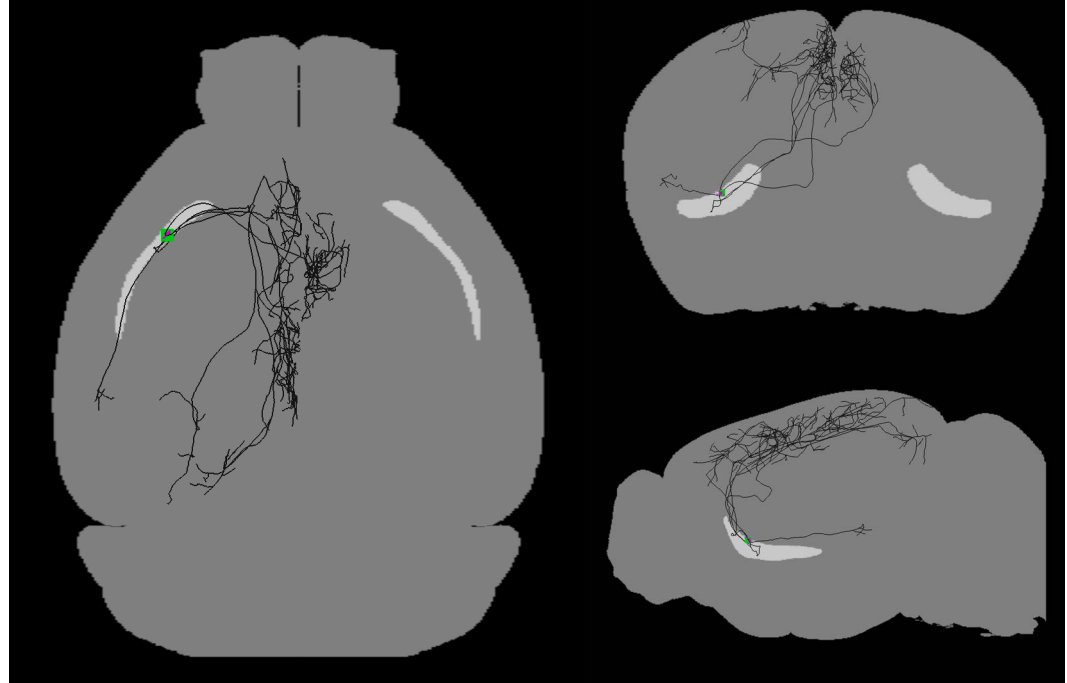

236174\_03429\_03528\_X12632\_Y10625\_CLA\_Bilateral\_C3

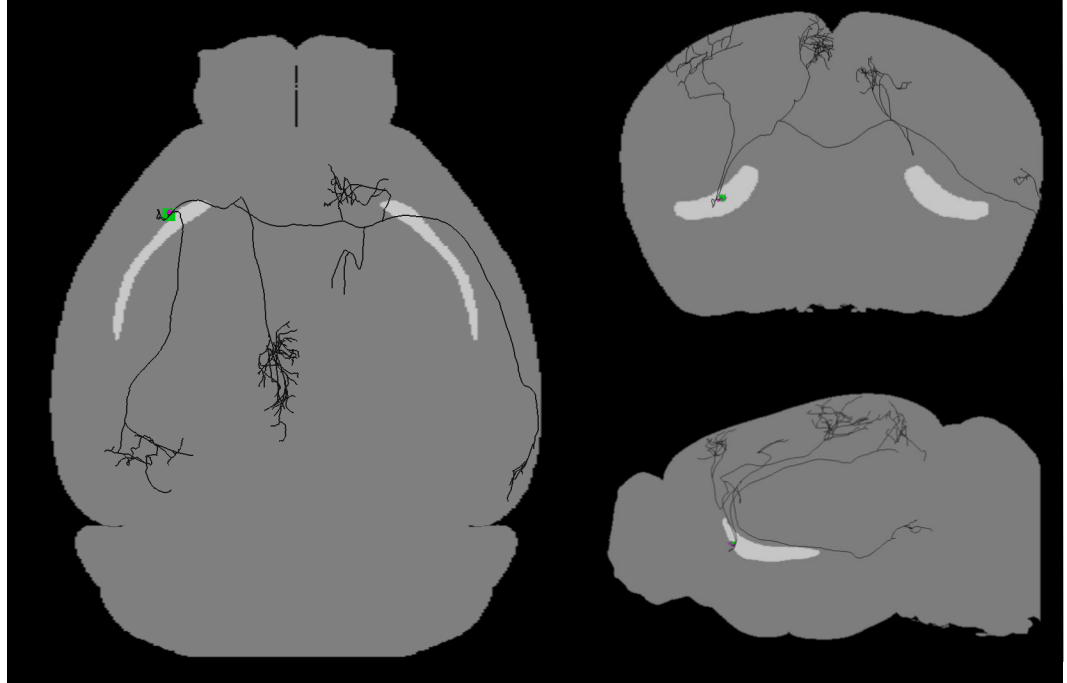

17109\_02401\_02500\_X09695\_Y09693\_CLA\_Bilateral\_C4

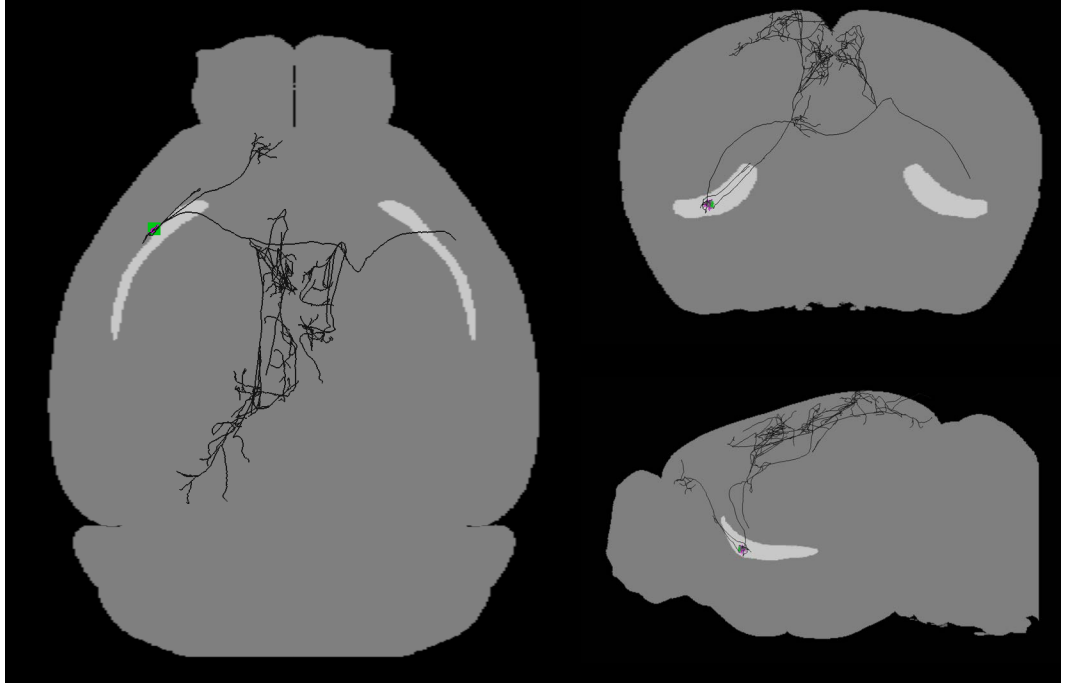

17109\_02601\_02700\_X10213\_Y08783\_CLA\_Bilateral\_C4

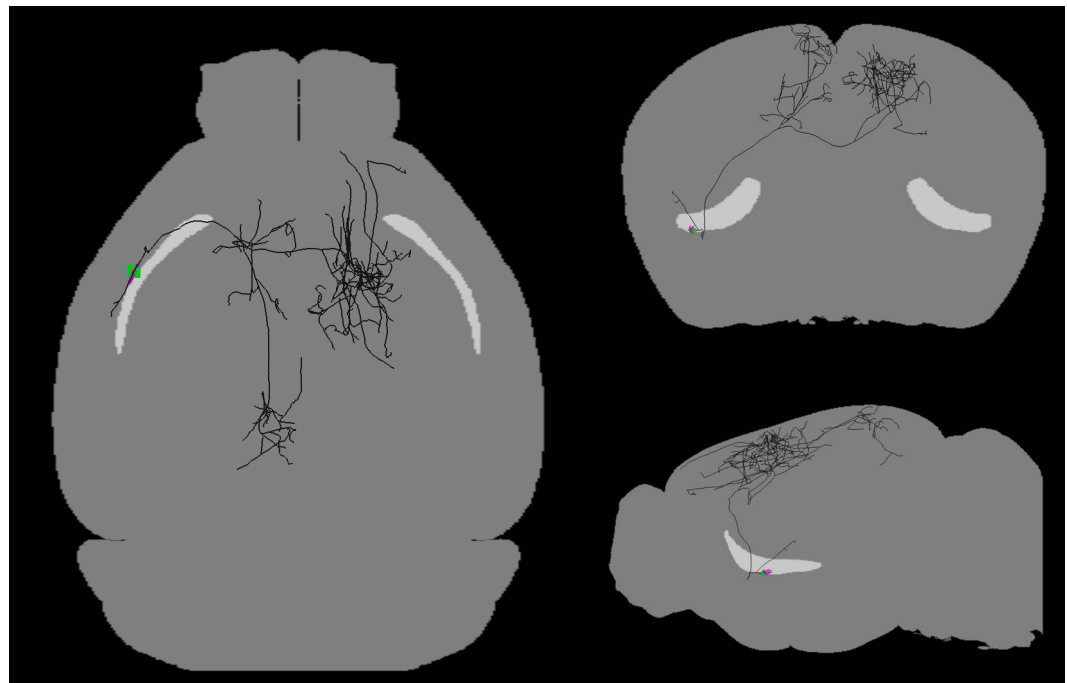

17109\_03101\_03200\_X10824\_Y07188\_CLA\_Bilateral\_C4

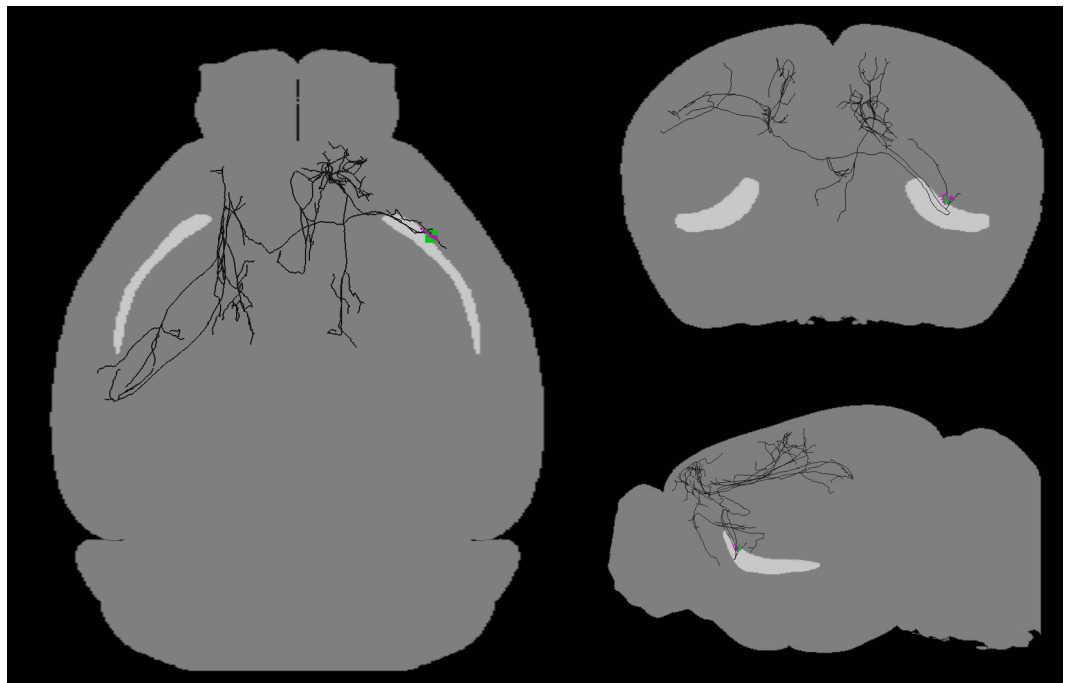

17782\_03487\_03487\_X11014\_Y17041\_CLA\_Bilateral\_C4

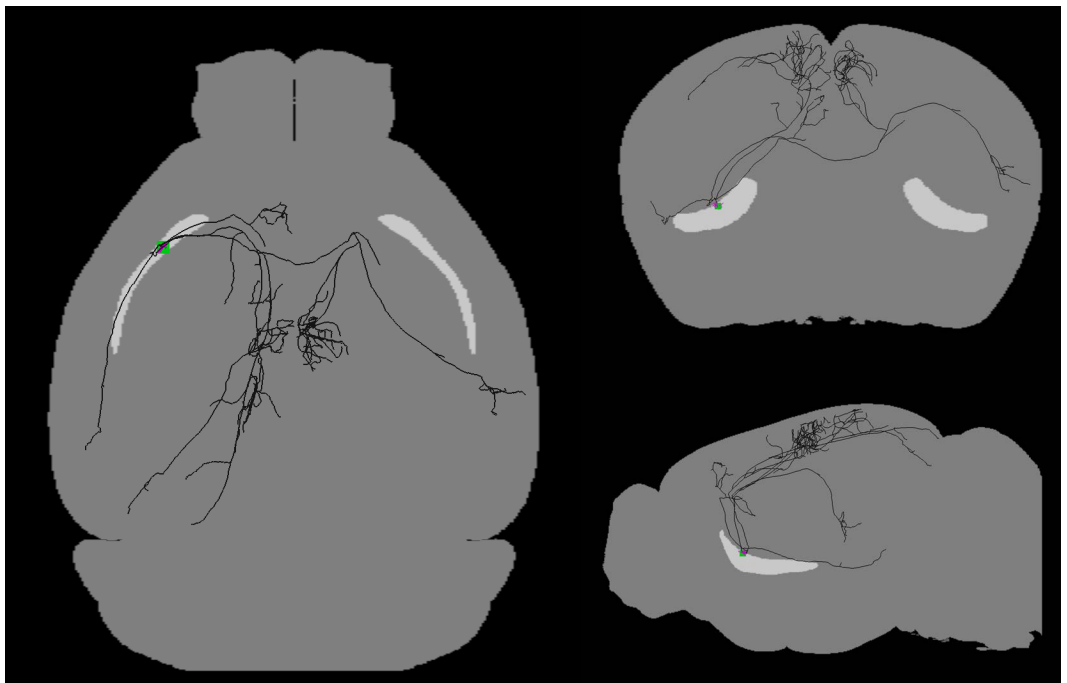

236174\_03447\_03459\_X12562\_Y10626\_CLA\_Bilateral\_C4

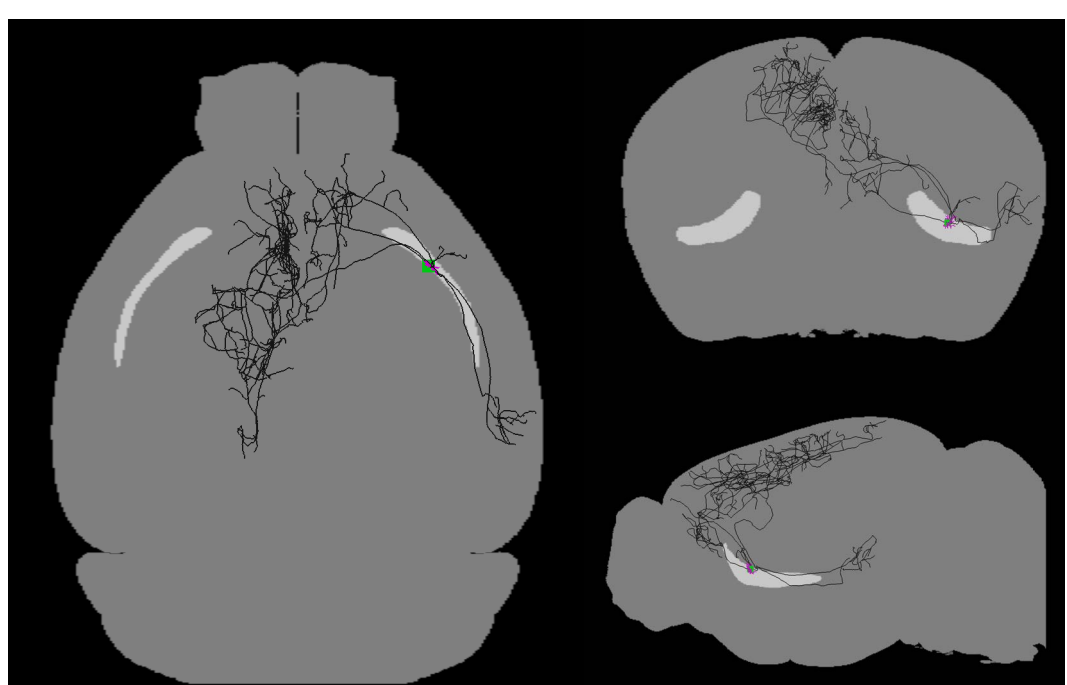

236174\_03536\_03545\_X15159\_Y25525\_CLA\_Bilateral\_C4

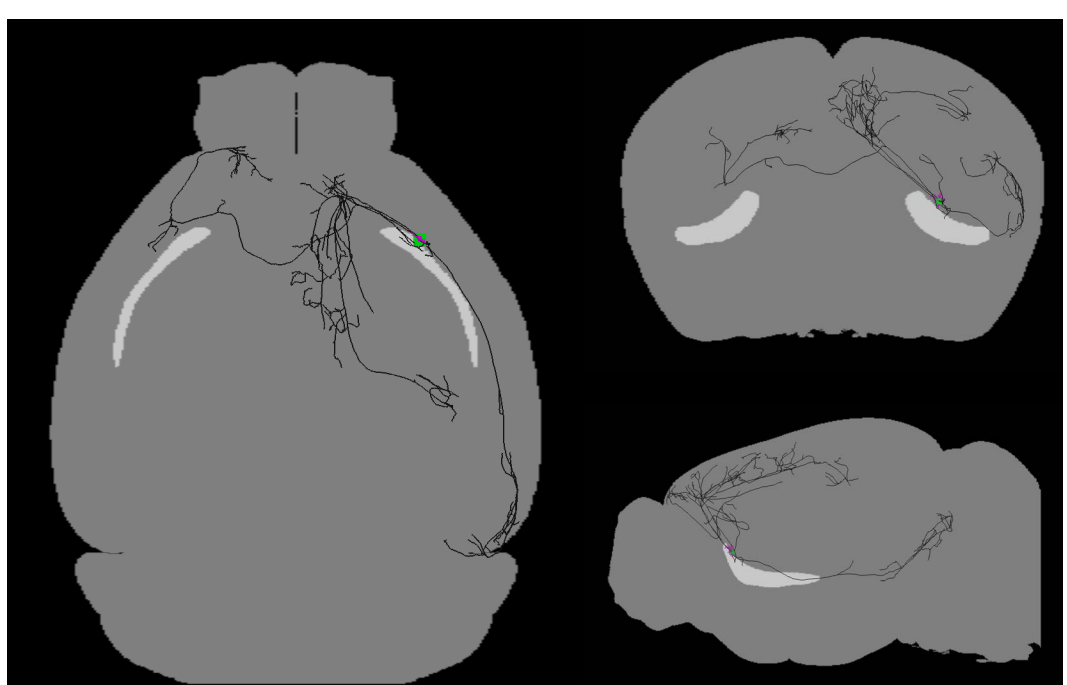

17782\_03284\_03284\_X11909\_Y16428\_CLA\_Bilateral\_Cnan

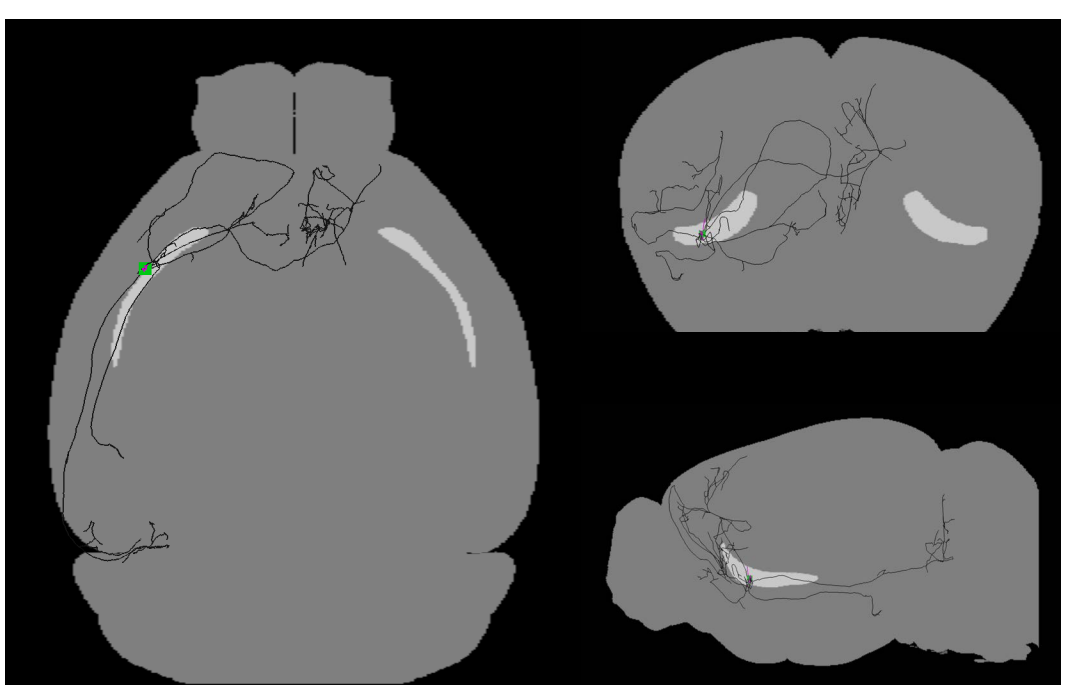

17782\_03672\_03672\_X34784\_Y19432\_CLA\_Bilateral\_Cnan

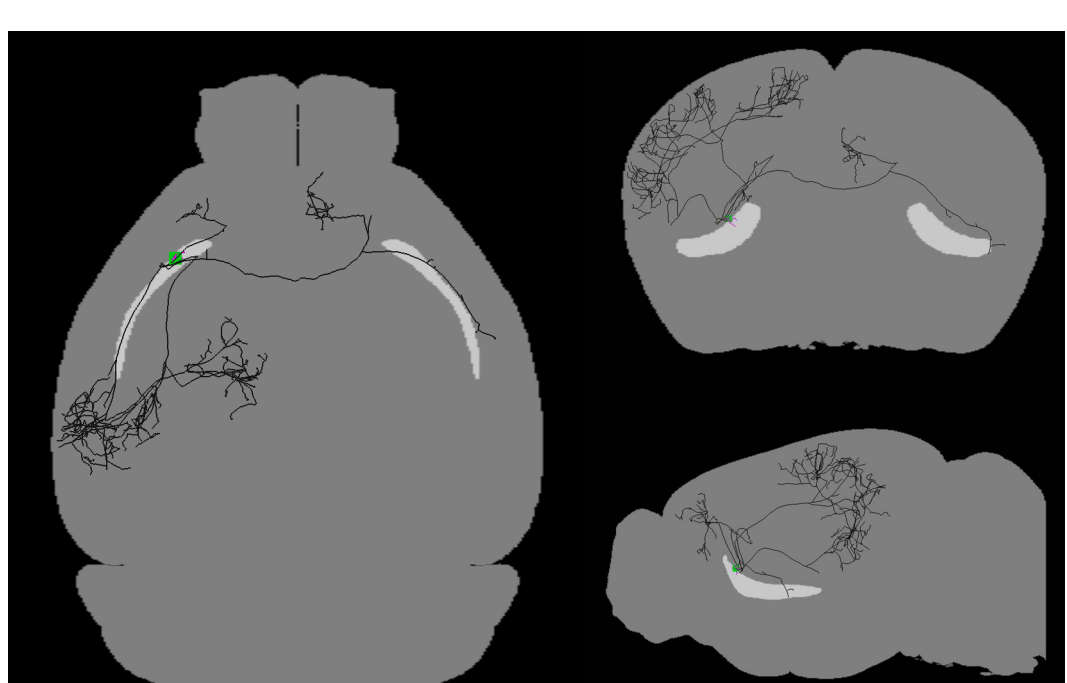

236174\_03229\_03328\_X11950\_Y11335\_CLA\_Bilateral\_Cnan

CLA\_ipsilateral

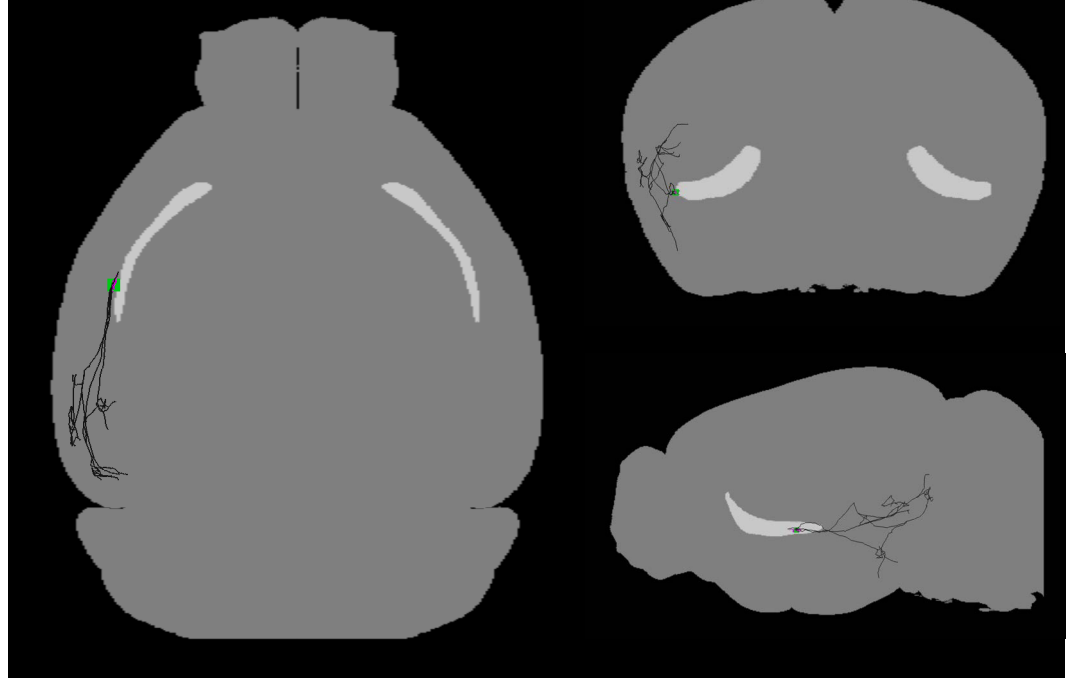

17781\_04698\_04698\_X17857\_Y11456\_CLA\_Ipsilateral\_C1

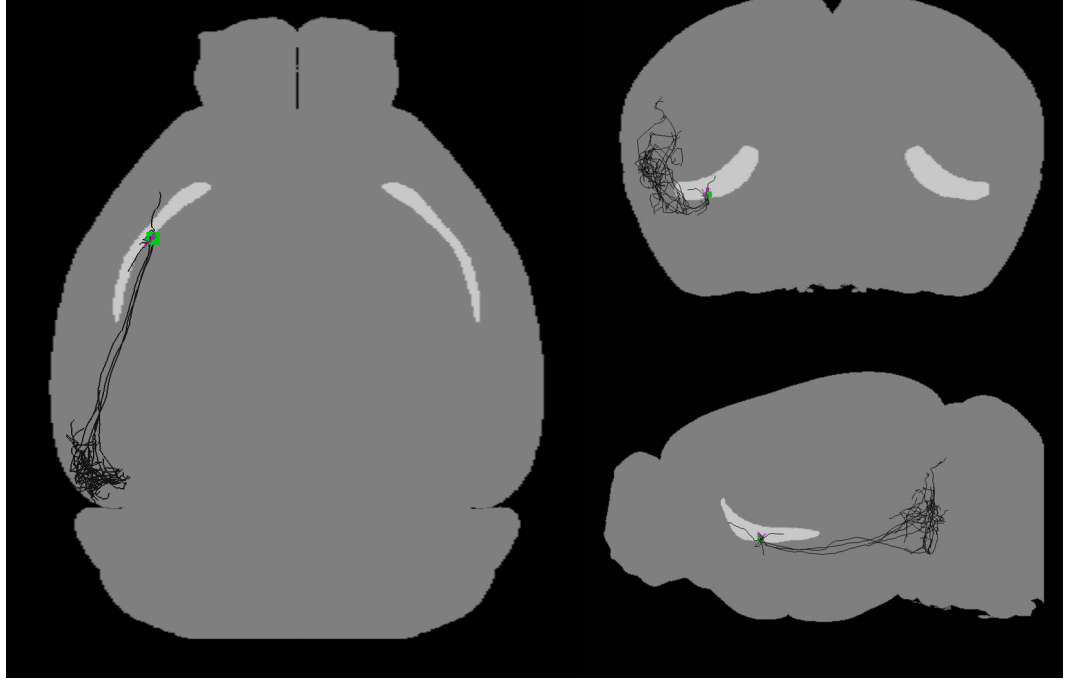

236174\_03729\_03828\_X13645\_Y09551\_CLA\_Ipsilateral\_C1

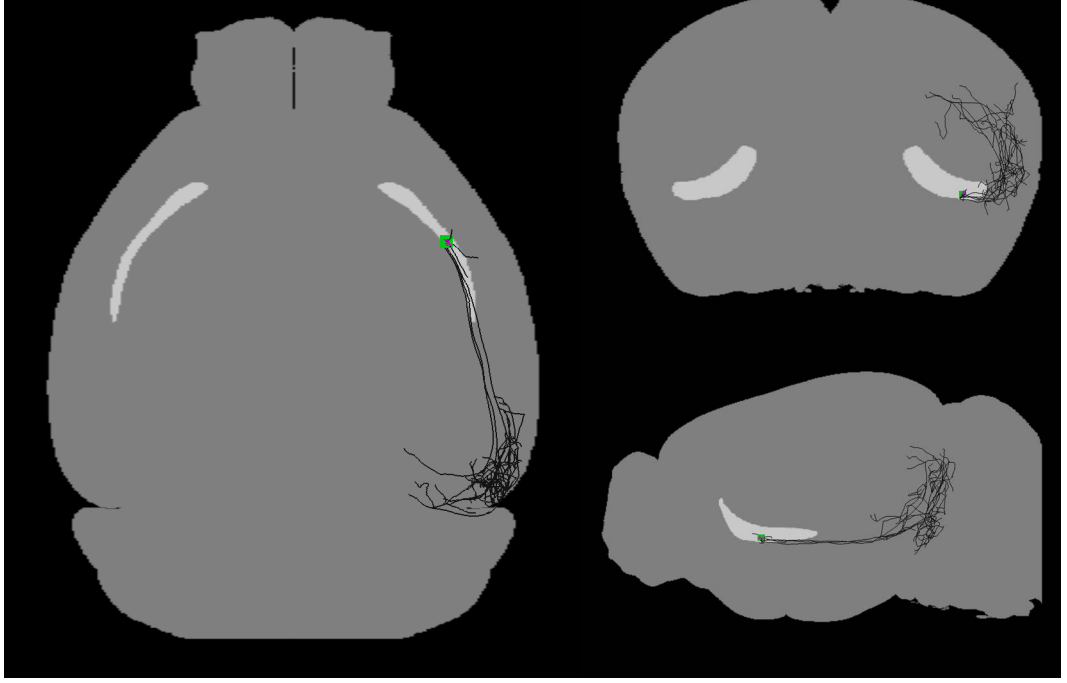

236174\_03829\_03928\_X16301\_Y26647\_CLA\_Ipsilateral\_C1

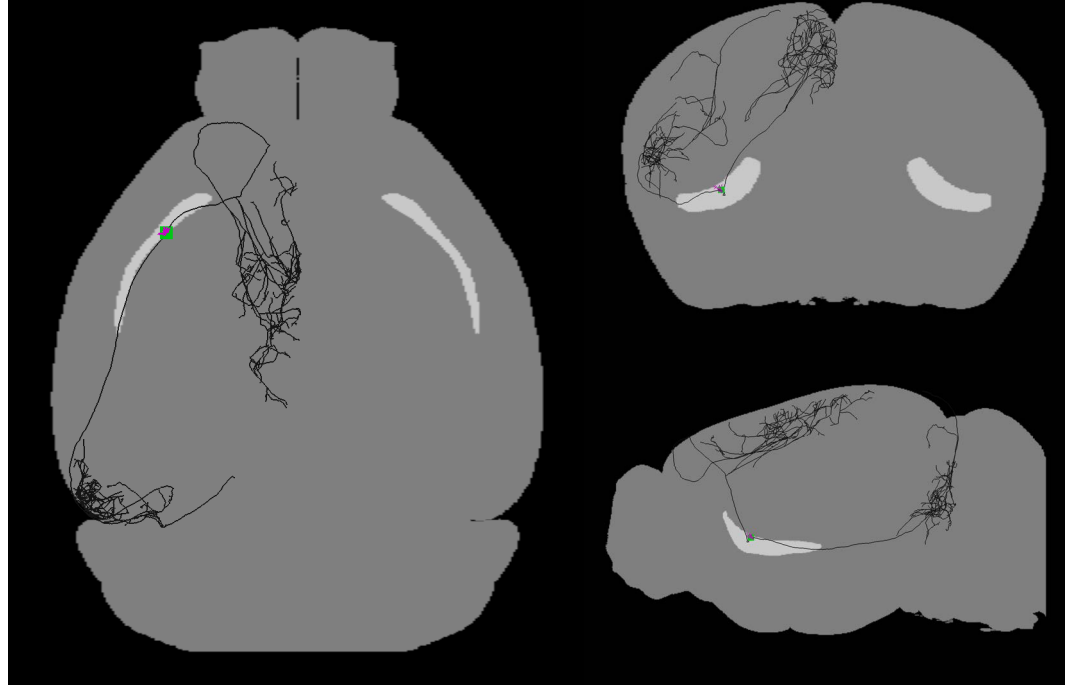

236174\_03529\_03628\_X12805\_Y10541\_CLA\_Ipsilateral\_C2

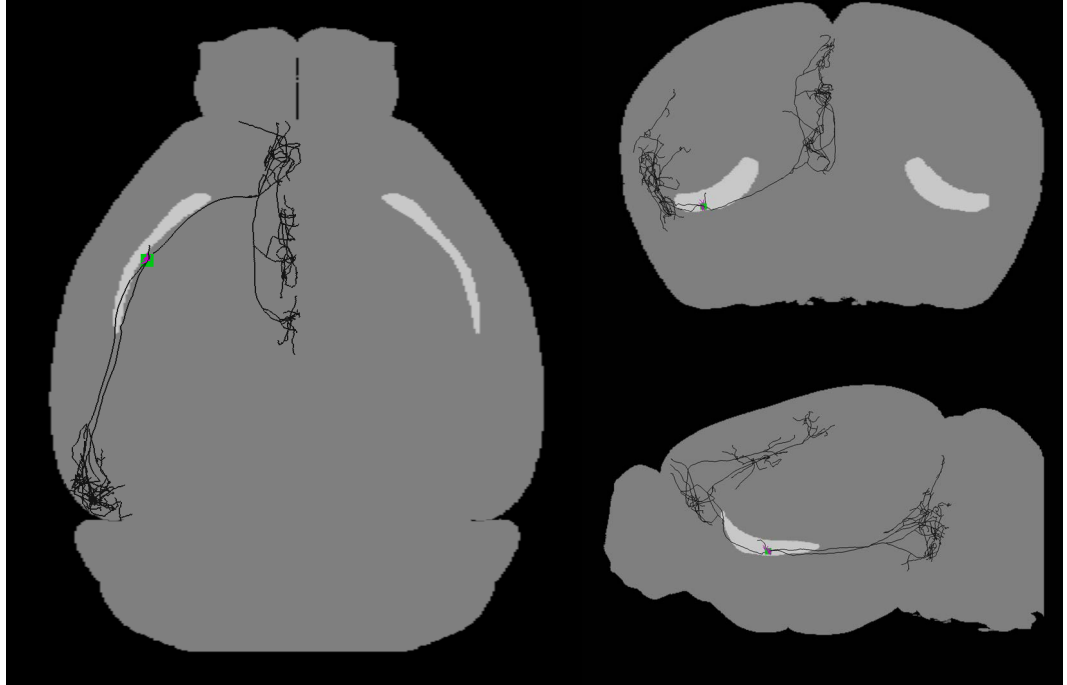

236174\_03929\_04028\_X13599\_Y09165\_CLA\_Ipsilateral\_C2

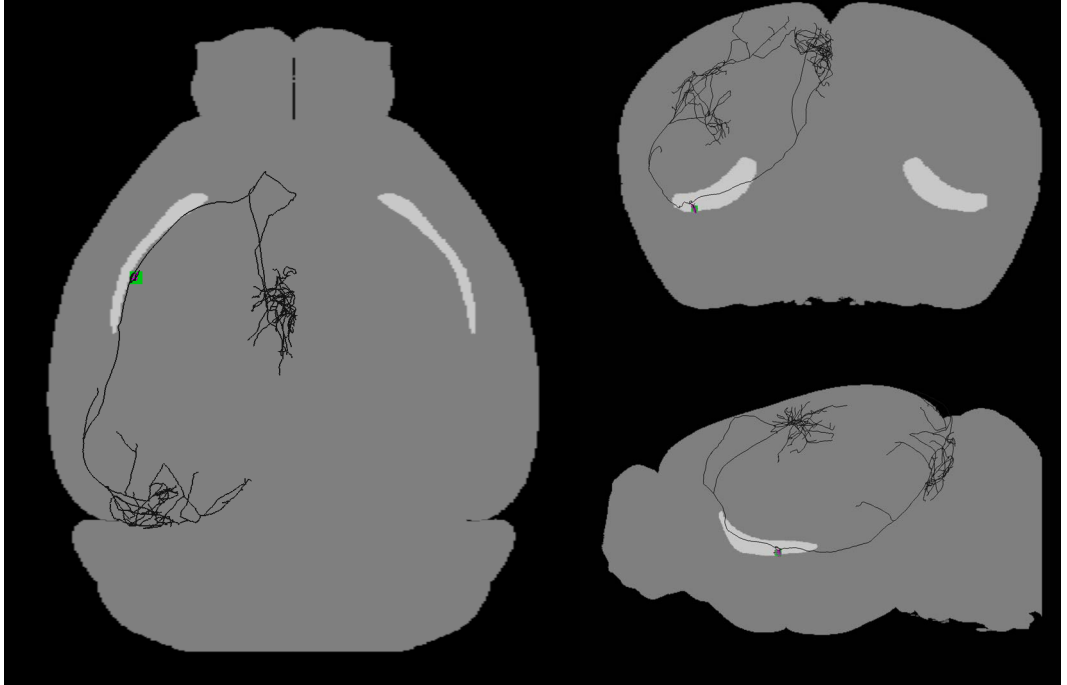

236174\_04229\_04328\_X13663\_Y08589\_CLA\_Ipsilateral\_C2

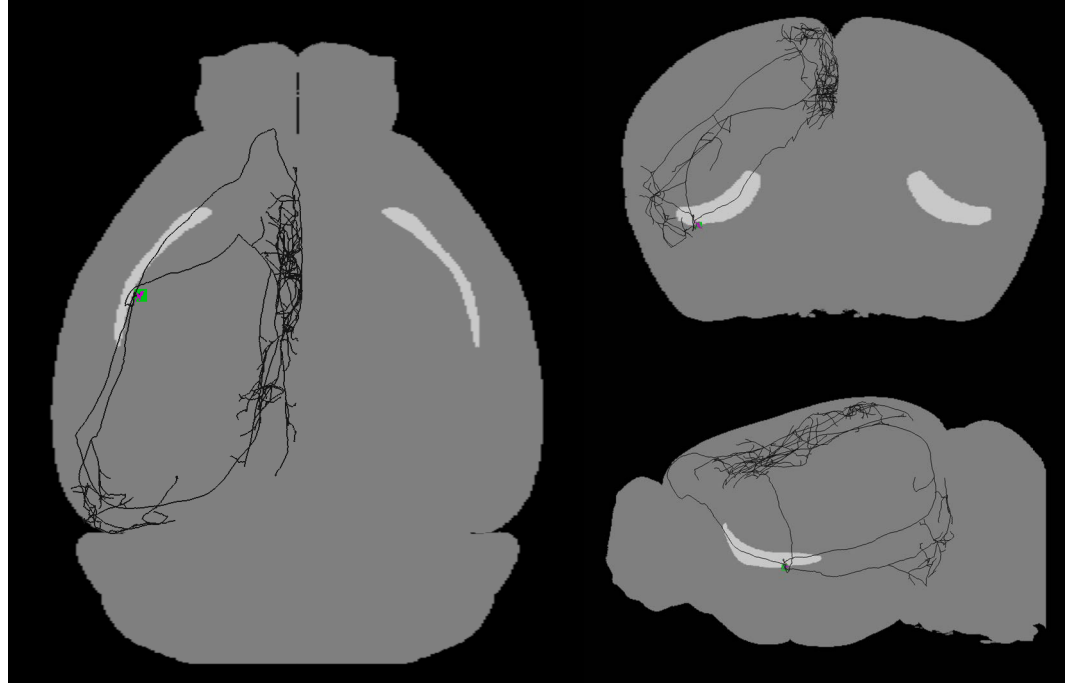

236174\_04266\_04266\_X13848\_Y08550\_CLA\_Ipsilateral\_C2

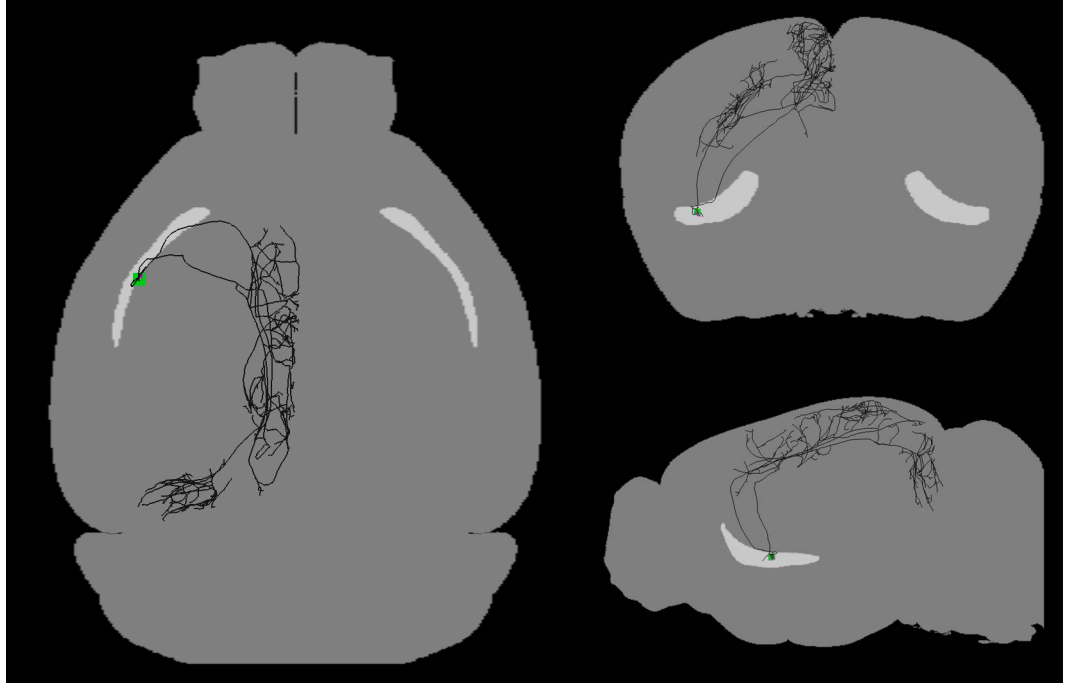

236174\_04029\_04128\_X13079\_Y08858\_CLA\_Ipsilateral\_C2

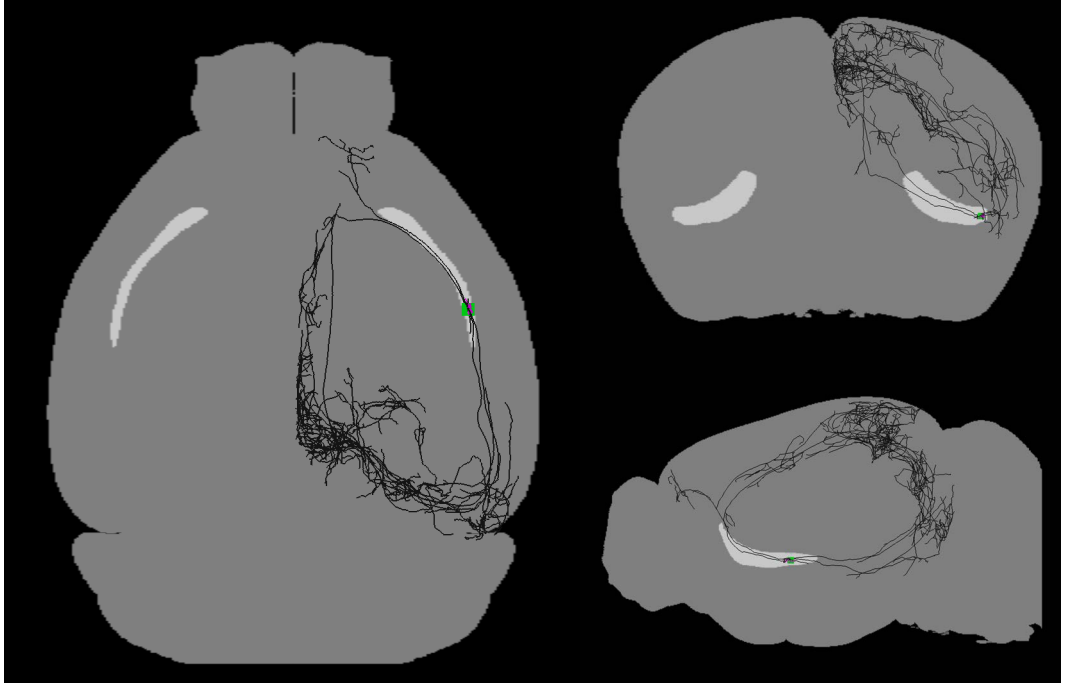

236174\_04647\_04647\_X16405\_Y27845\_CLA\_Ipsilateral\_C2

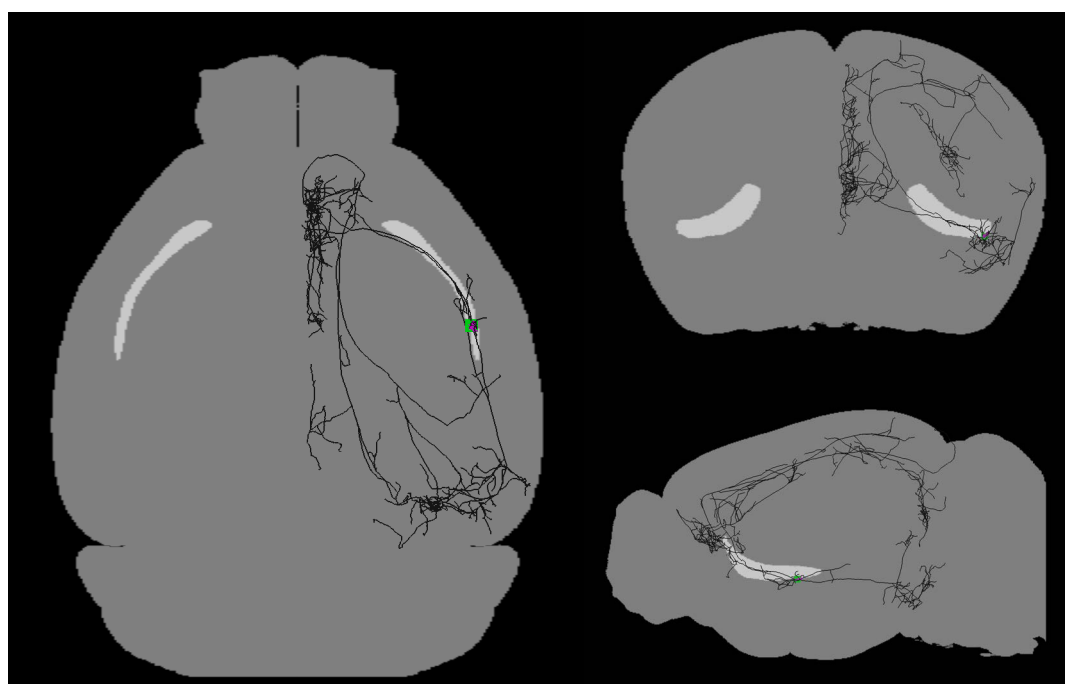

236174\_04729\_04829\_X16869\_Y27809\_CLA\_Ipsilateral\_C2

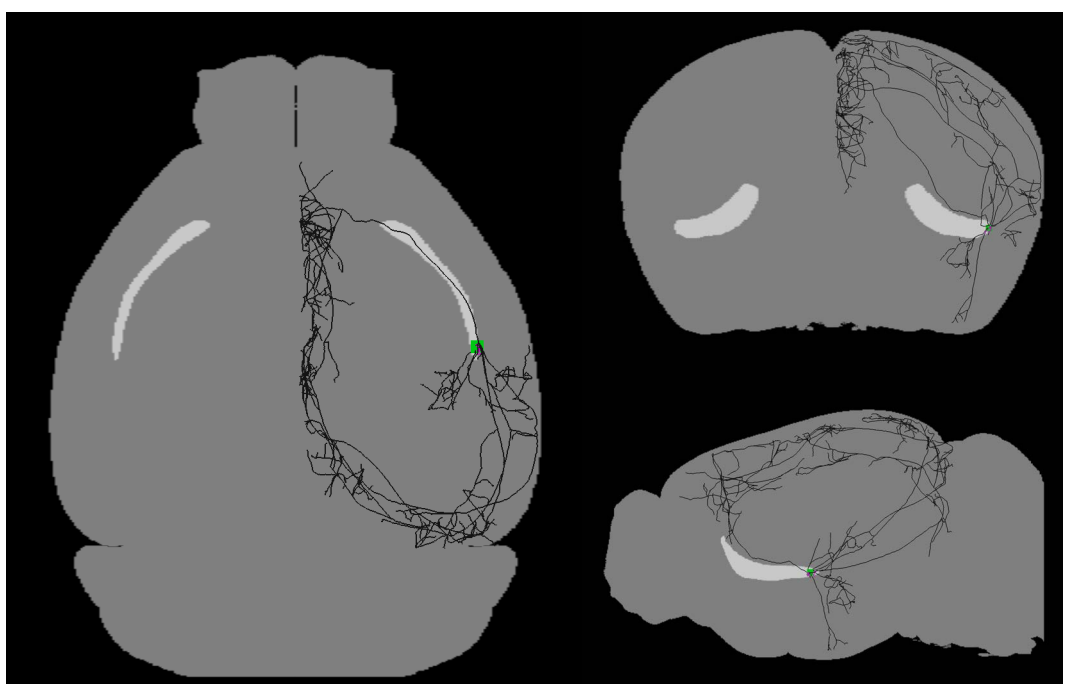

236174\_05138\_05237\_X16501\_Y28259\_CLA\_Ipsilateral\_C2

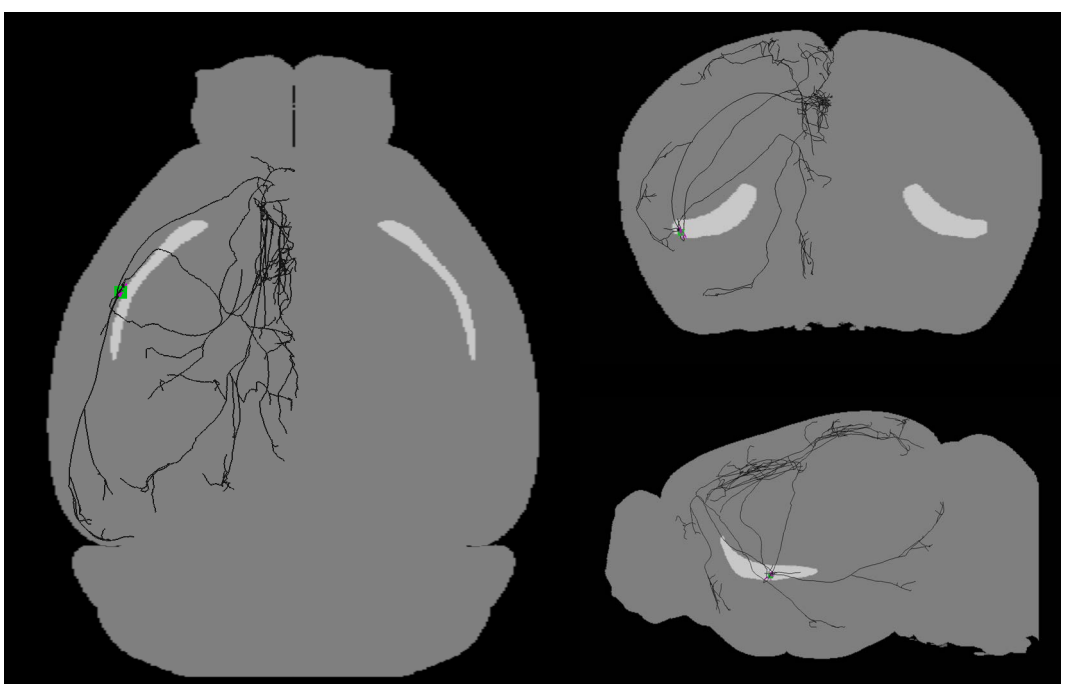

17781\_04095\_04095\_X17570\_Y12460\_CLA\_Ipsilateral\_C3

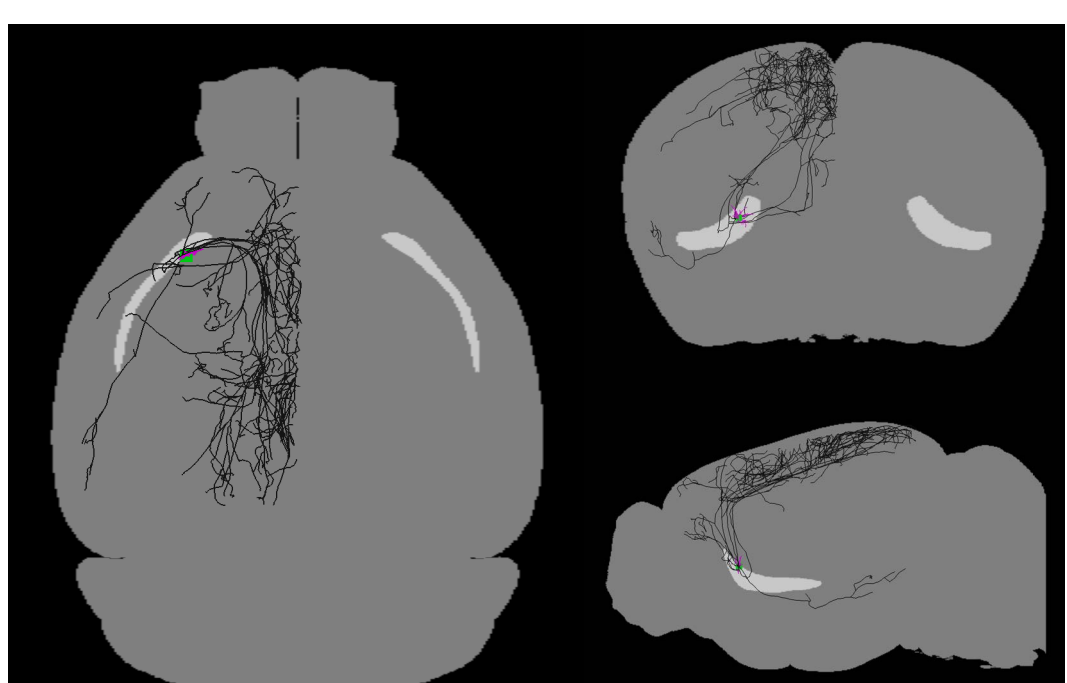

236174\_03229\_03328\_X12413\_Y11831\_CLA\_Ipsilateral\_C3

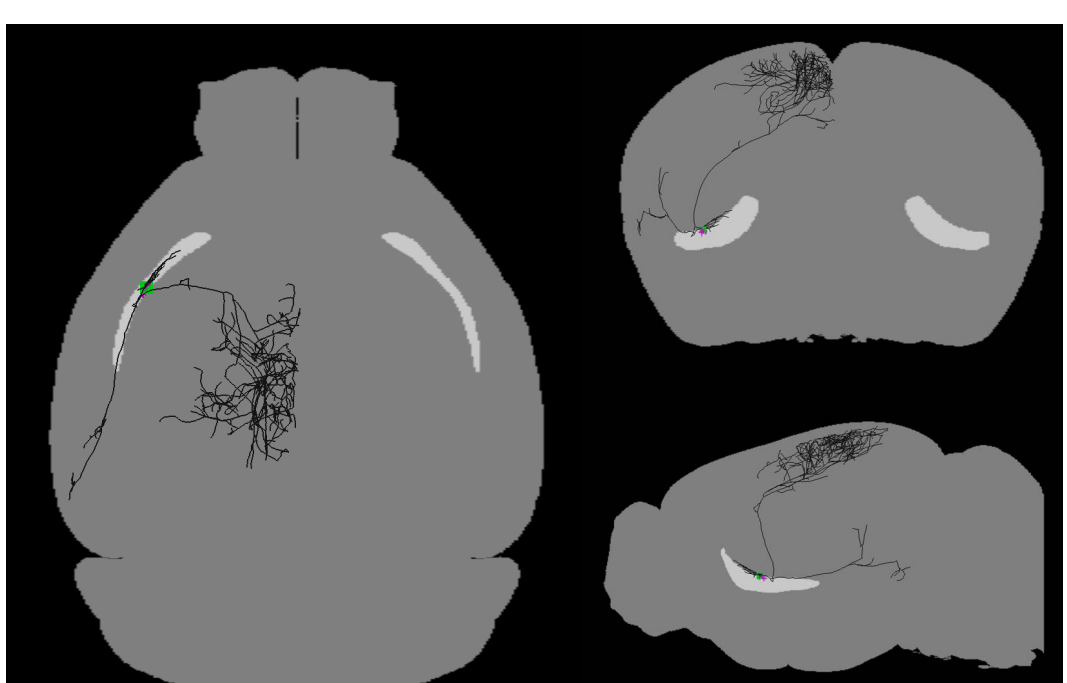

236174\_03729\_03828\_X12692\_Y09419\_CLA\_Ipsilateral\_C3

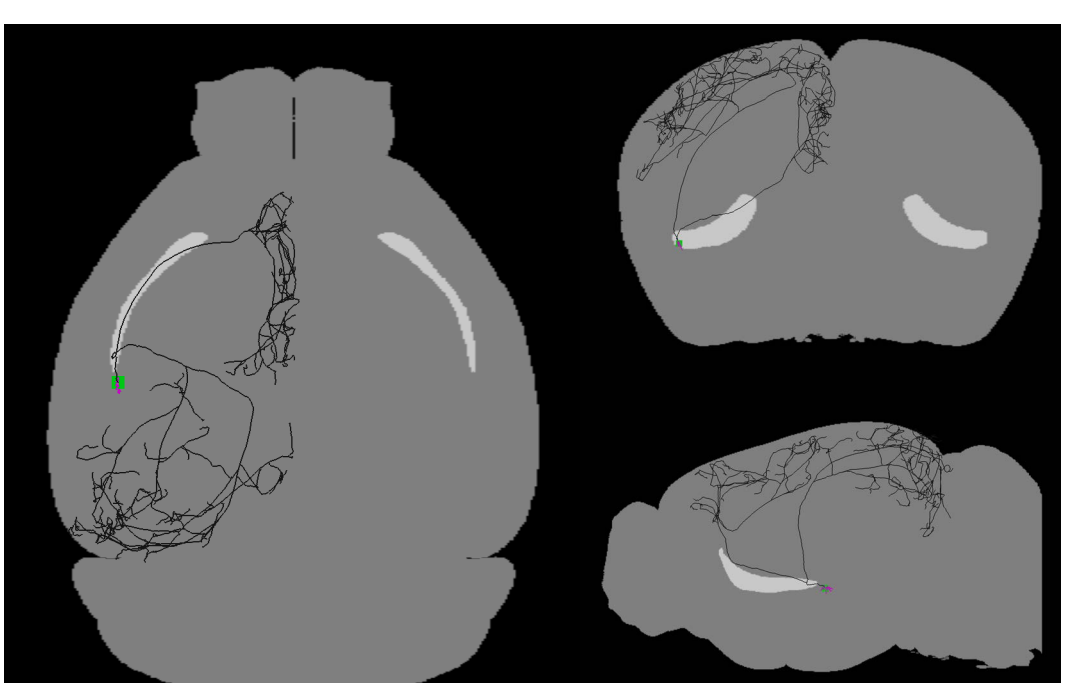

236174\_05338\_05437\_X13590\_Y07348\_CLA\_Ipsilateral\_C3

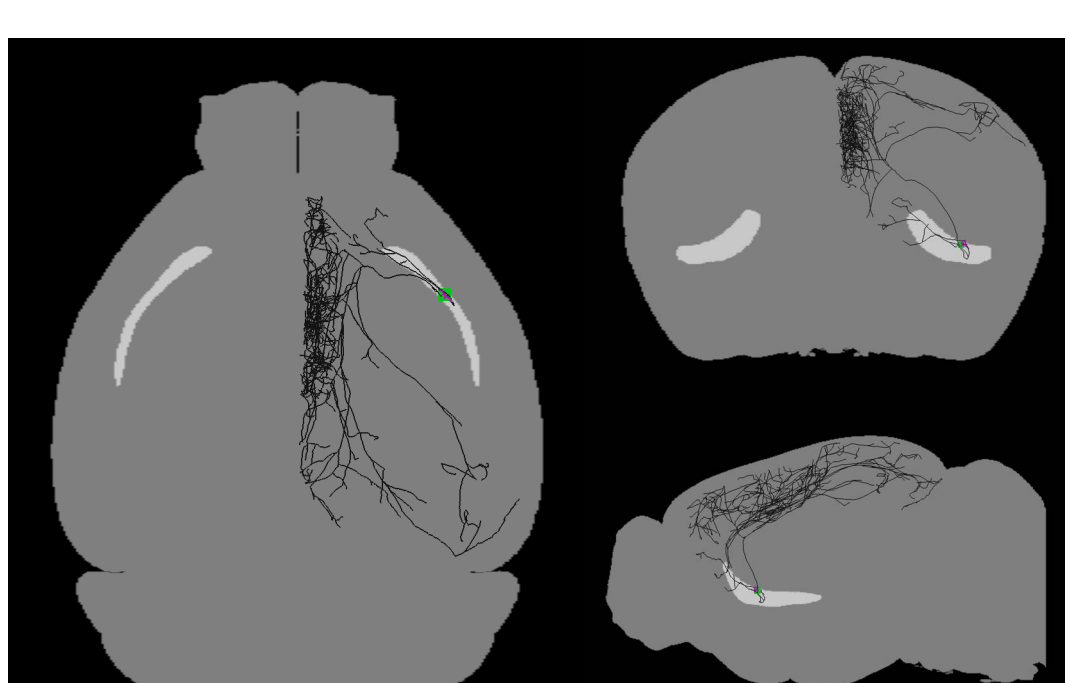

236174\_03729\_03828\_X15443\_Y26410\_CLA\_Ipsilateral\_C3

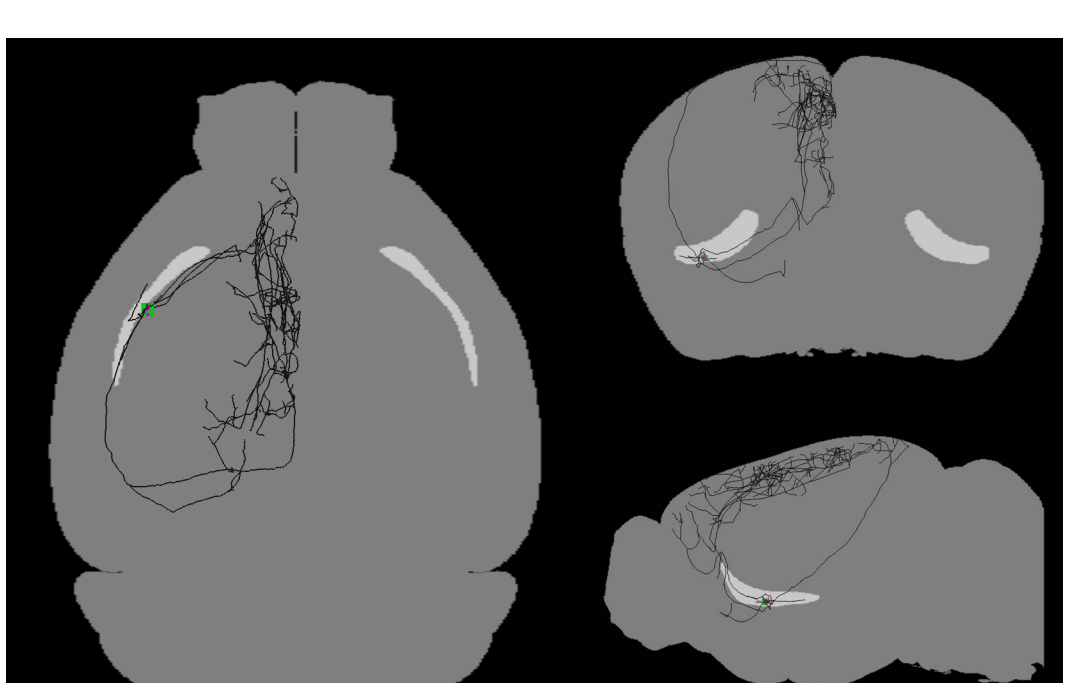

236174\_03829\_03928\_X13590\_Y09284\_CLA\_Ipsilateral\_C3

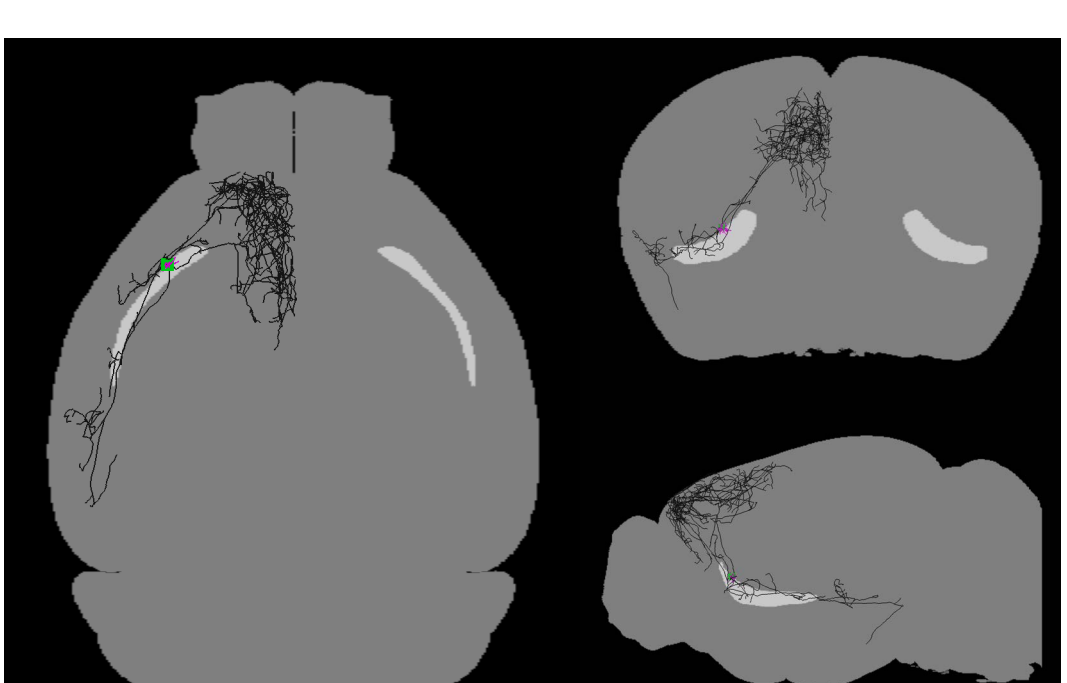

236174\_03215\_03215\_X11999\_Y11133\_CLA\_Ipsilateral\_C8

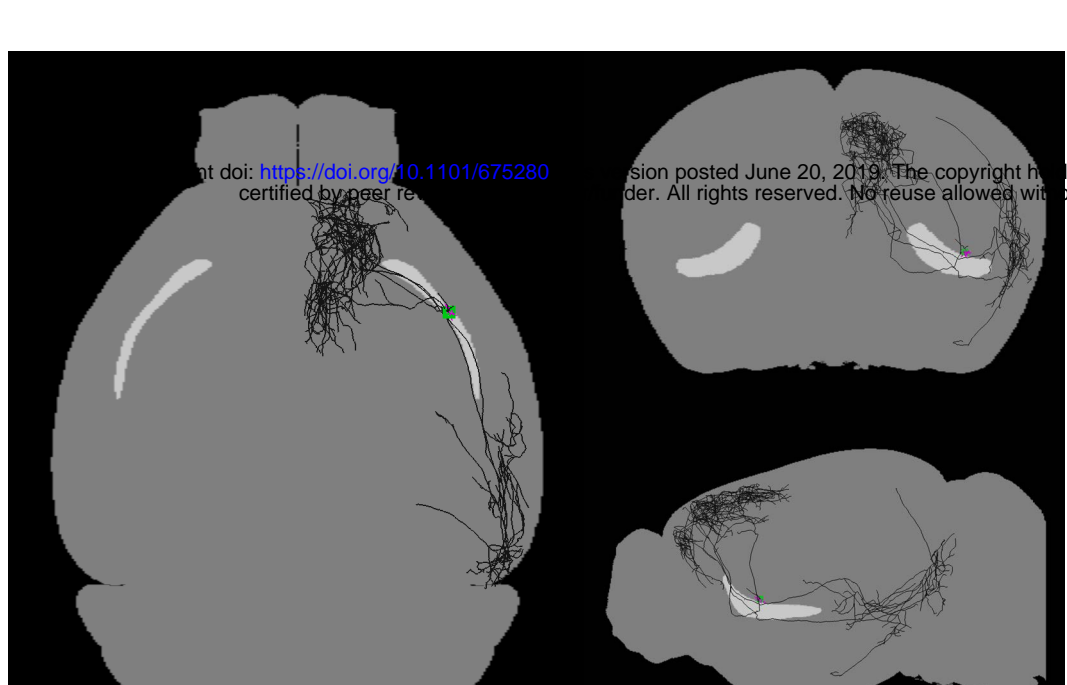

236174\_03729\_03828\_X15151\_Y26698\_CLA\_Ipsilateral\_C8

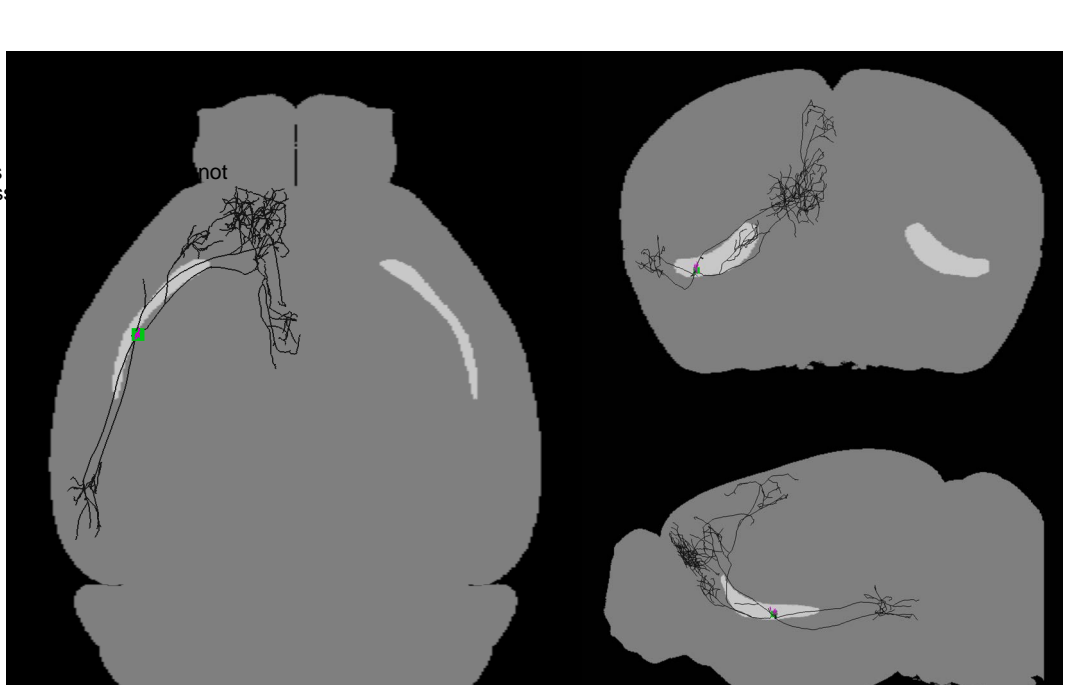

236174\_03970\_04170\_X13439\_Y08678\_CLA\_Ipsilateral\_C8

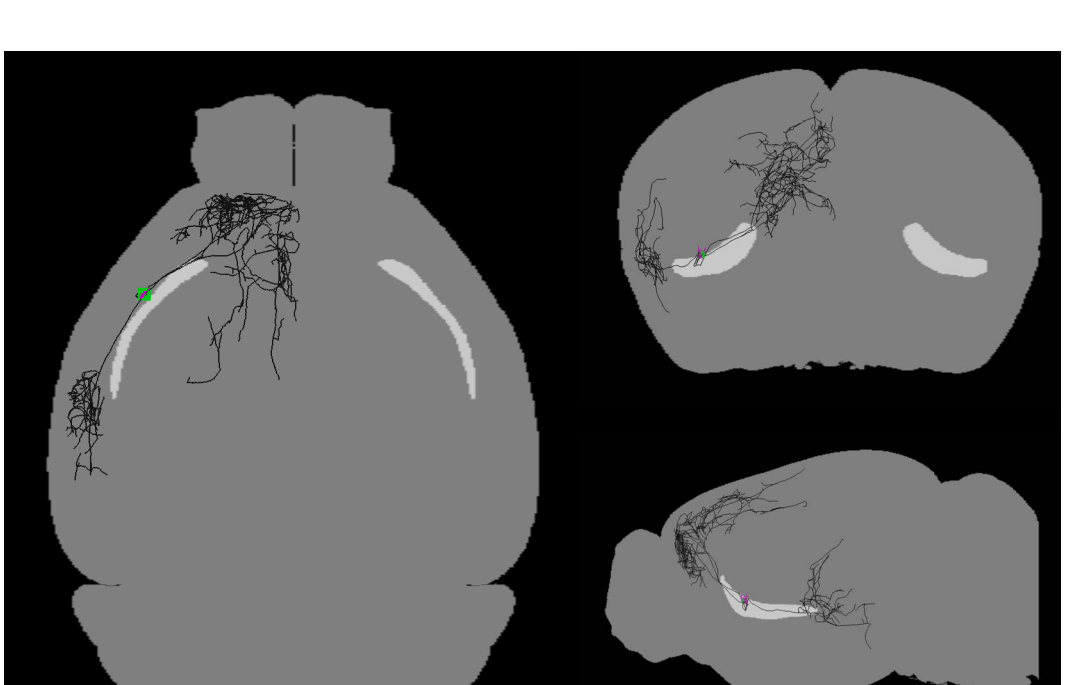

17781\_03320\_03320\_X16423\_Y14748\_CLA\_Ipsilateral\_C9

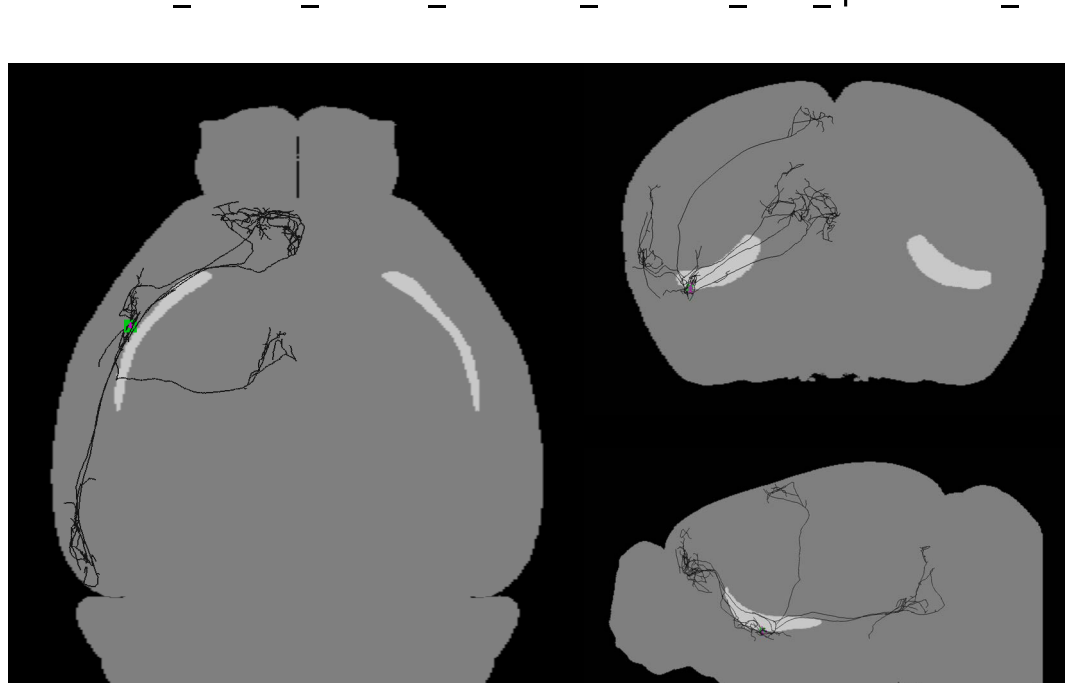

17781\_03668\_03668\_X17825\_Y13313\_CLA\_Ipsilateral\_C9

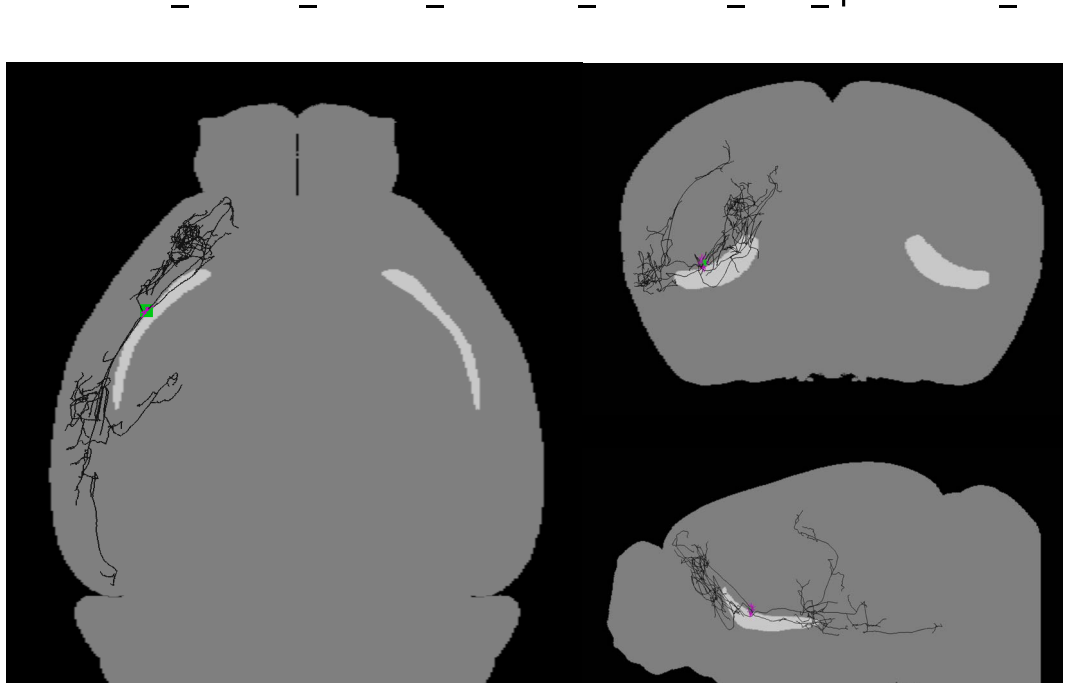

17782\_03651\_03651\_X35286\_Y18512\_CLA\_Ipsilateral\_C9

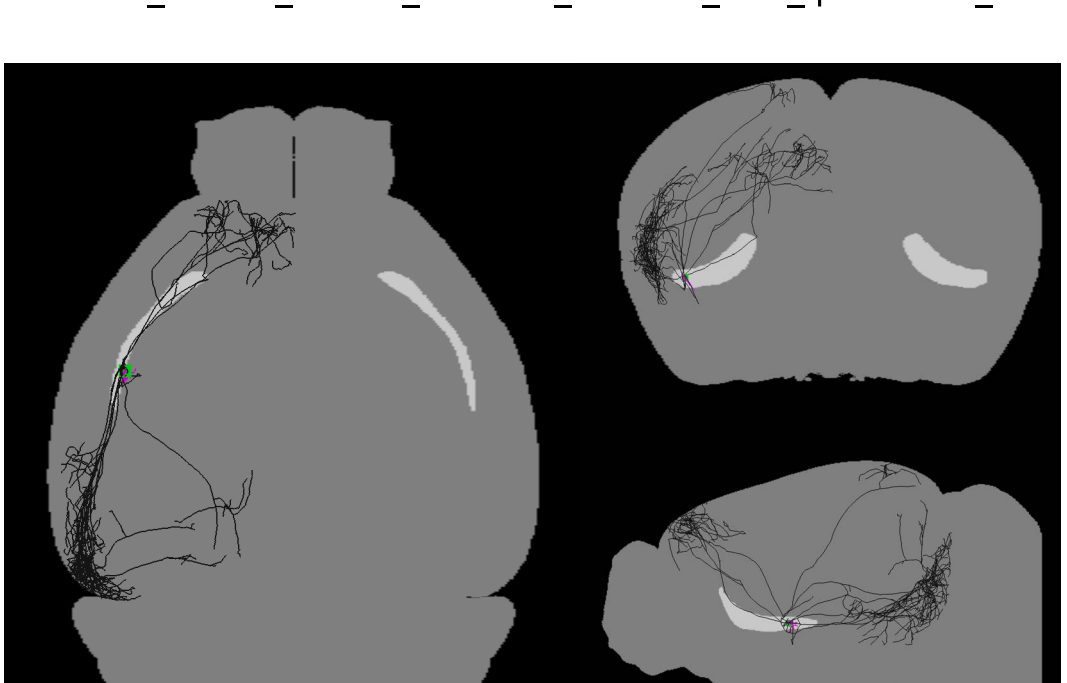

236174\_04429\_04528\_X13147\_Y08003\_CLA\_Ipsilateral\_Cnan

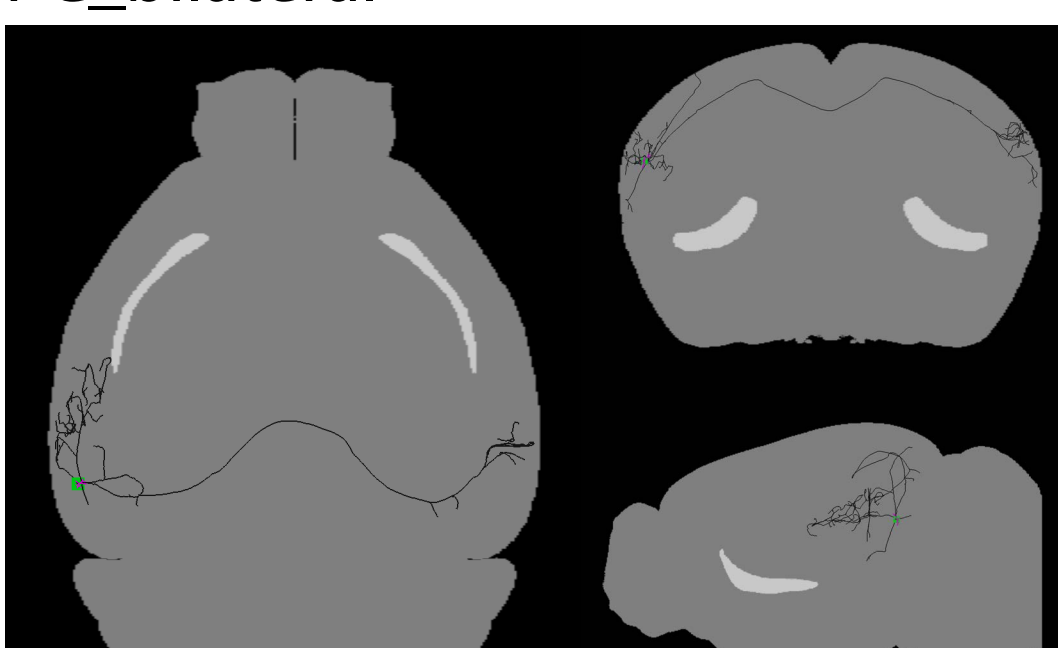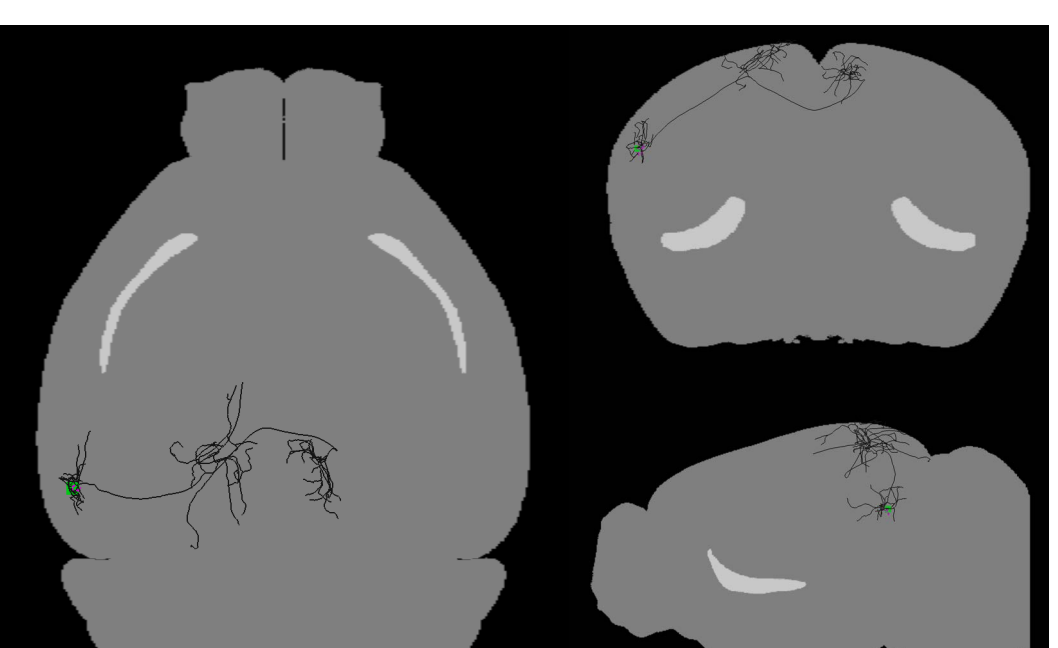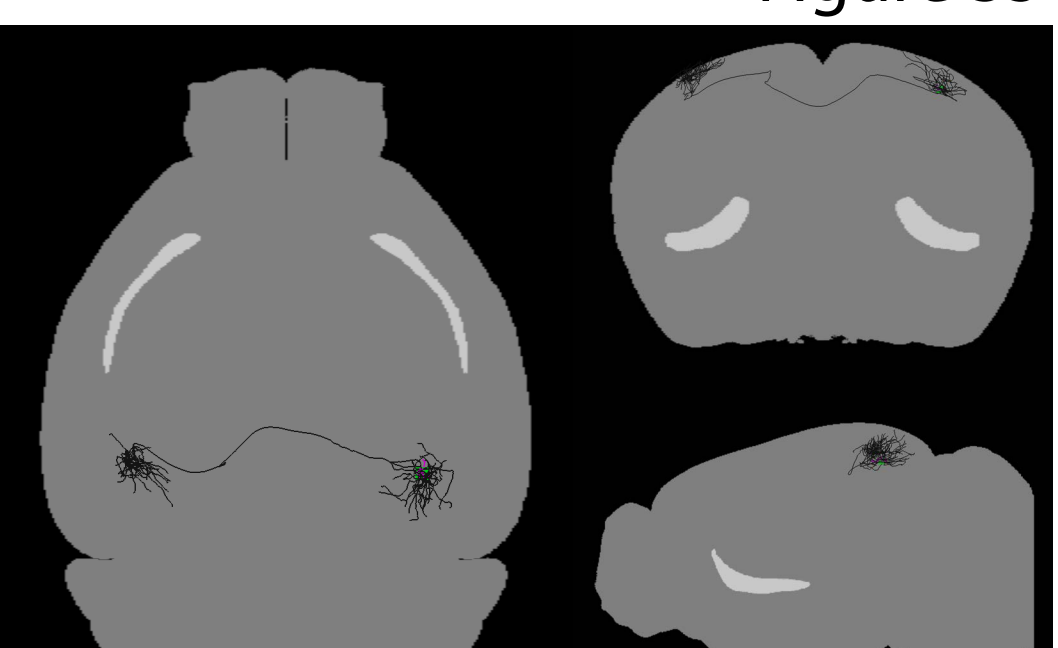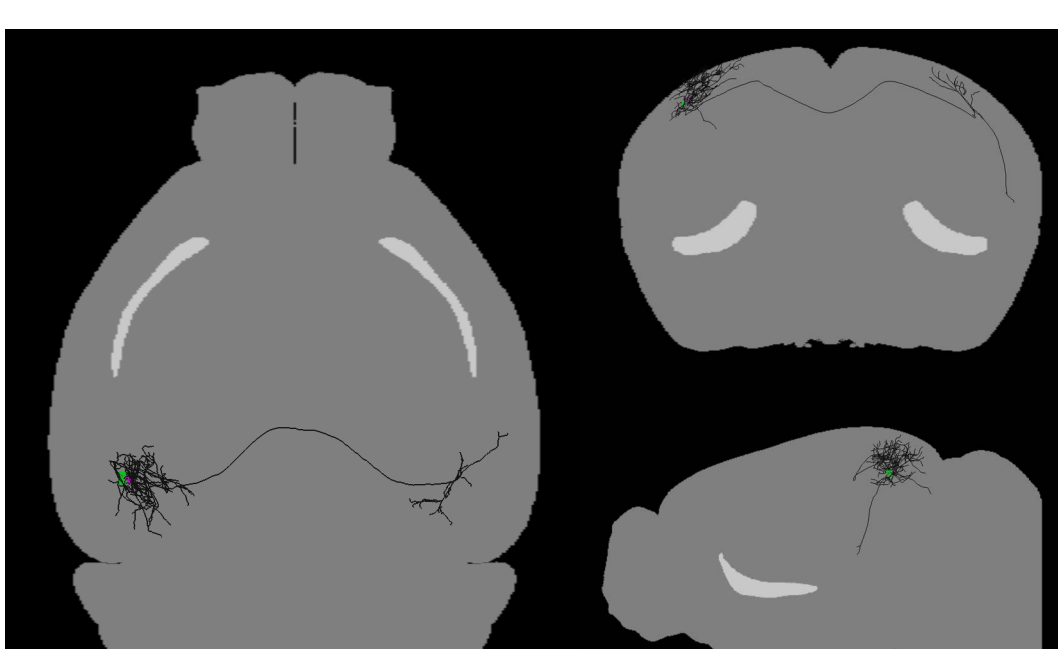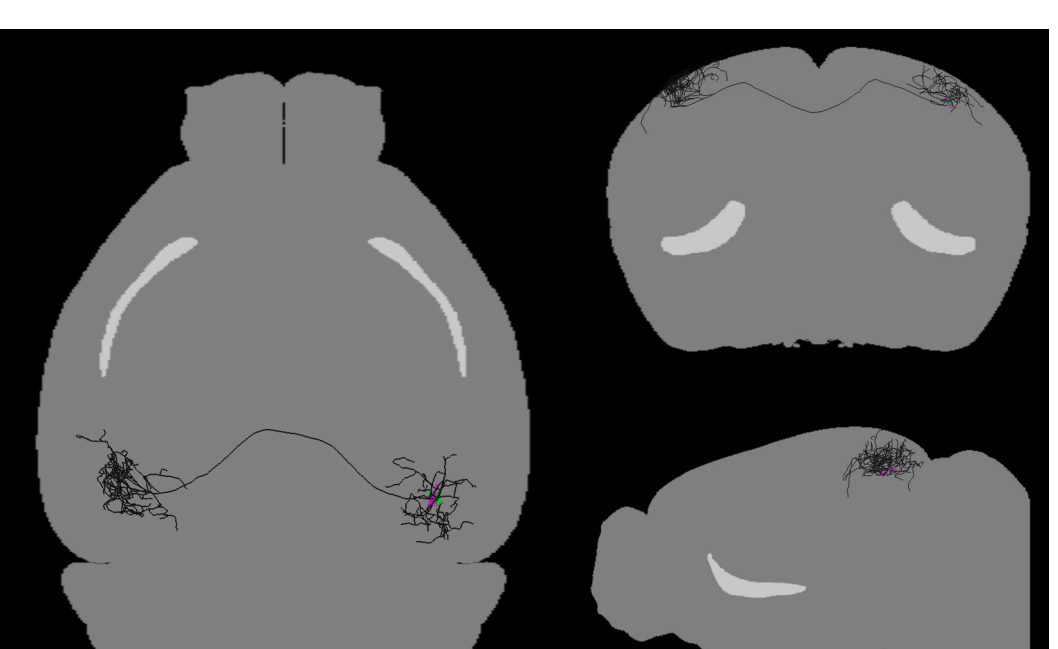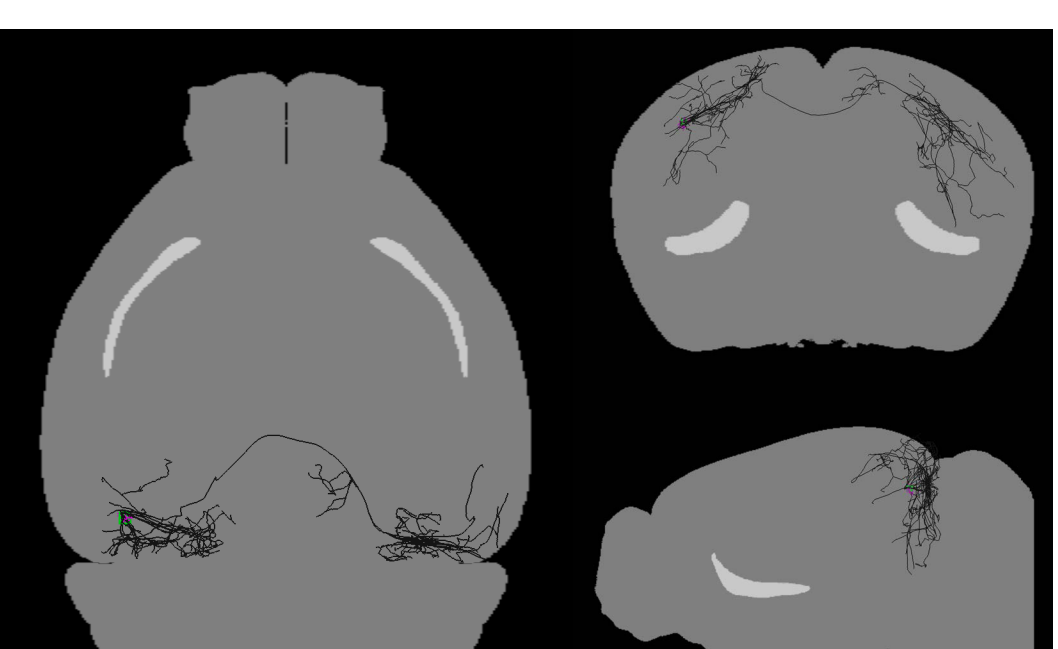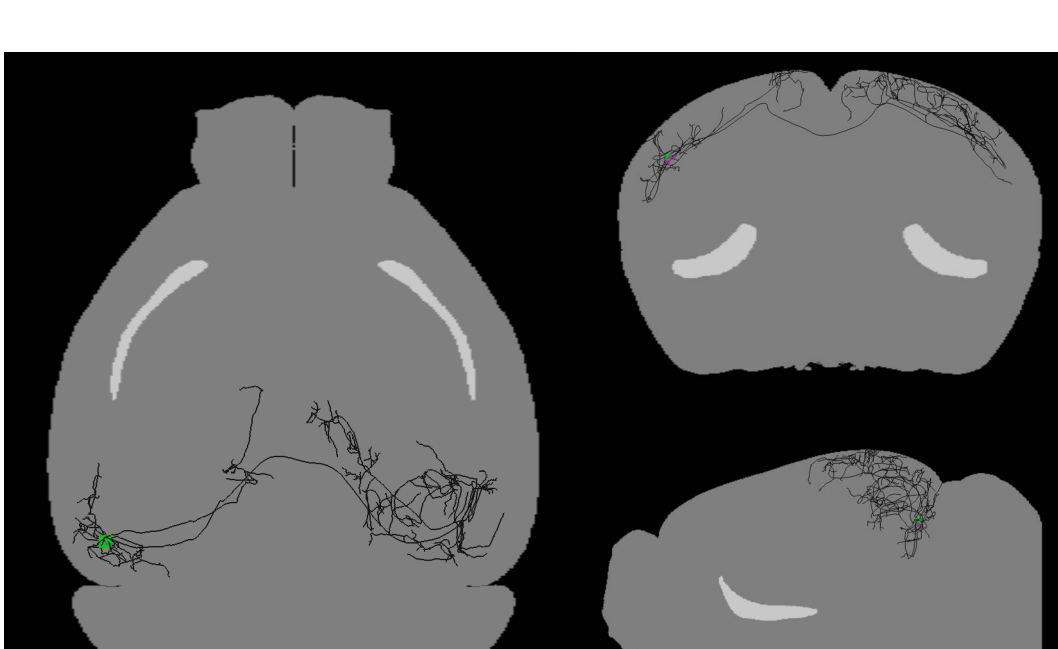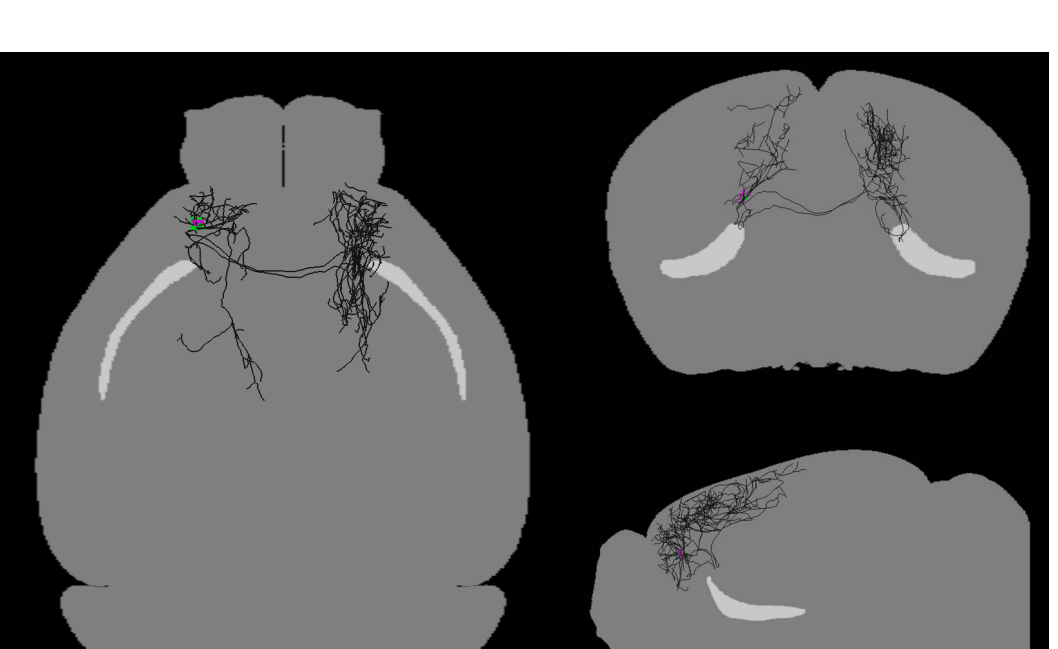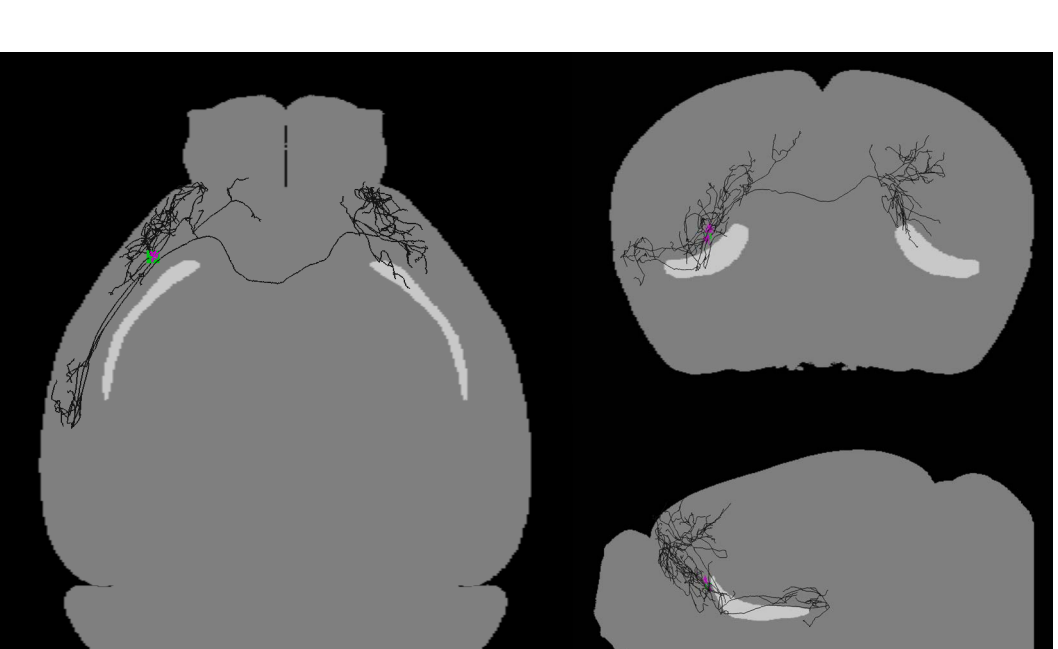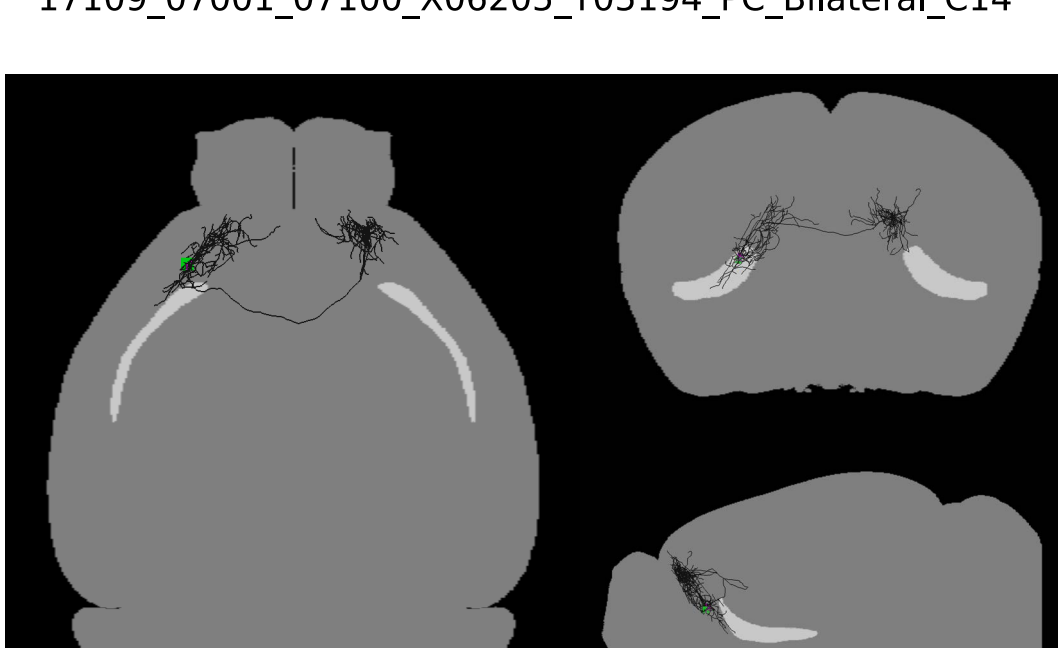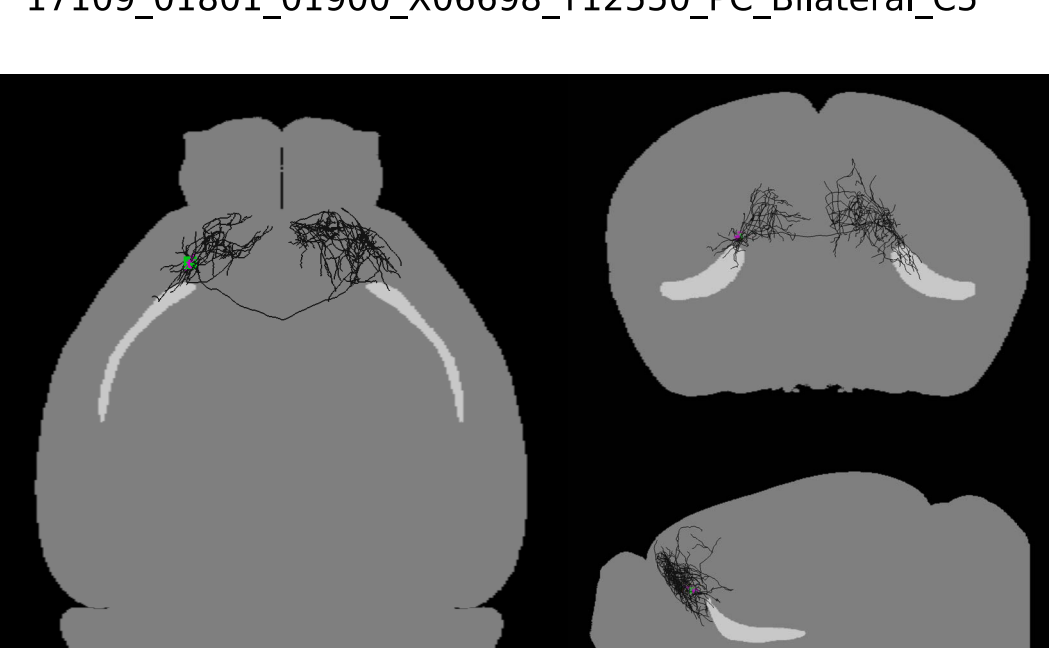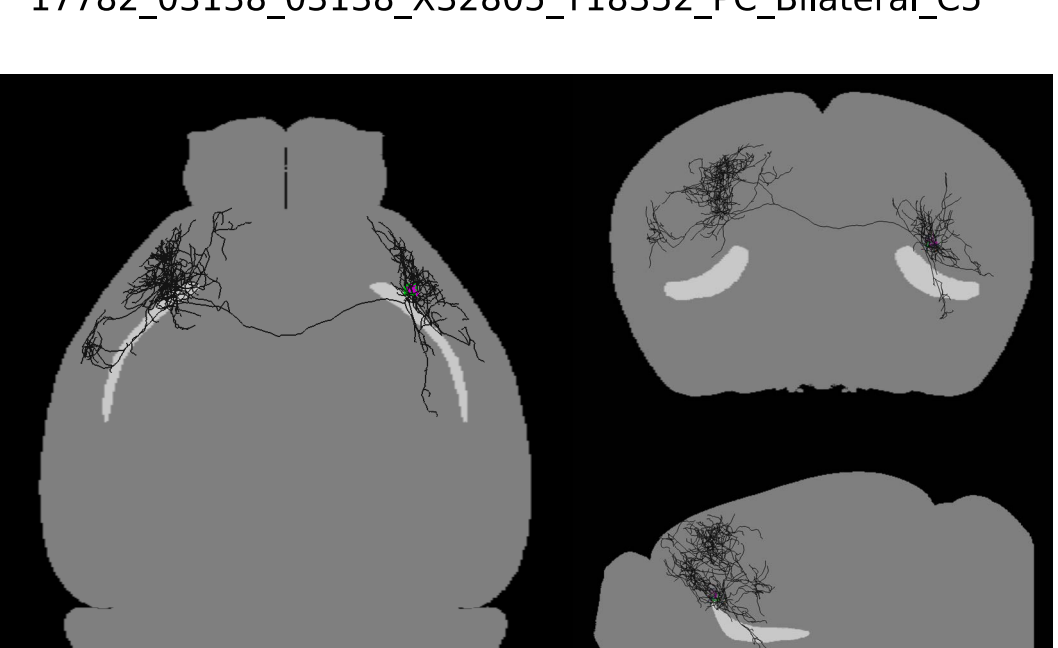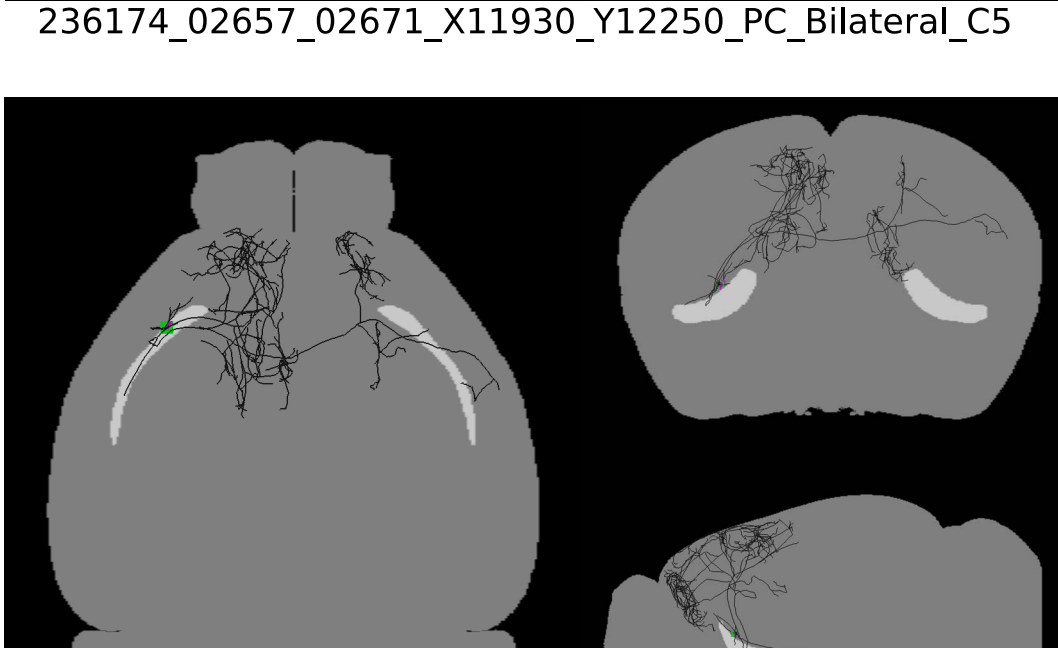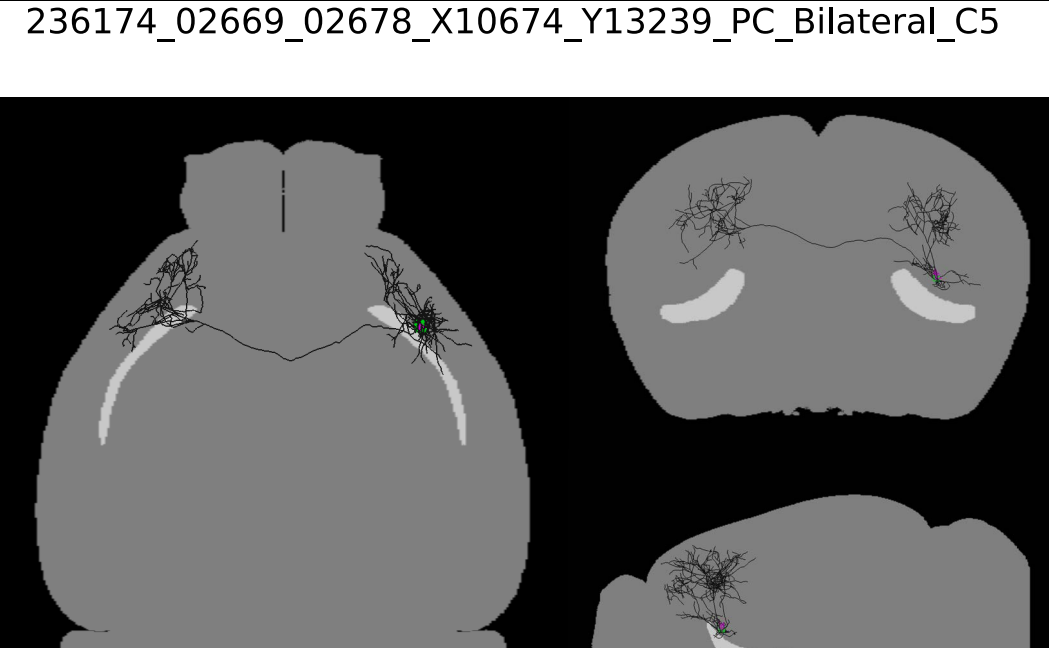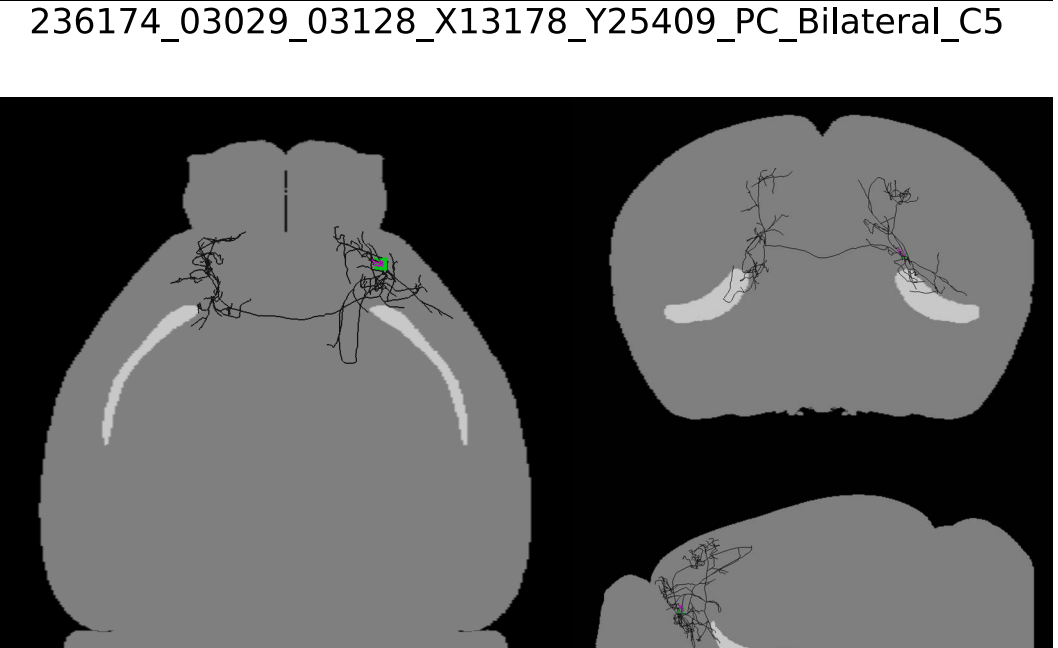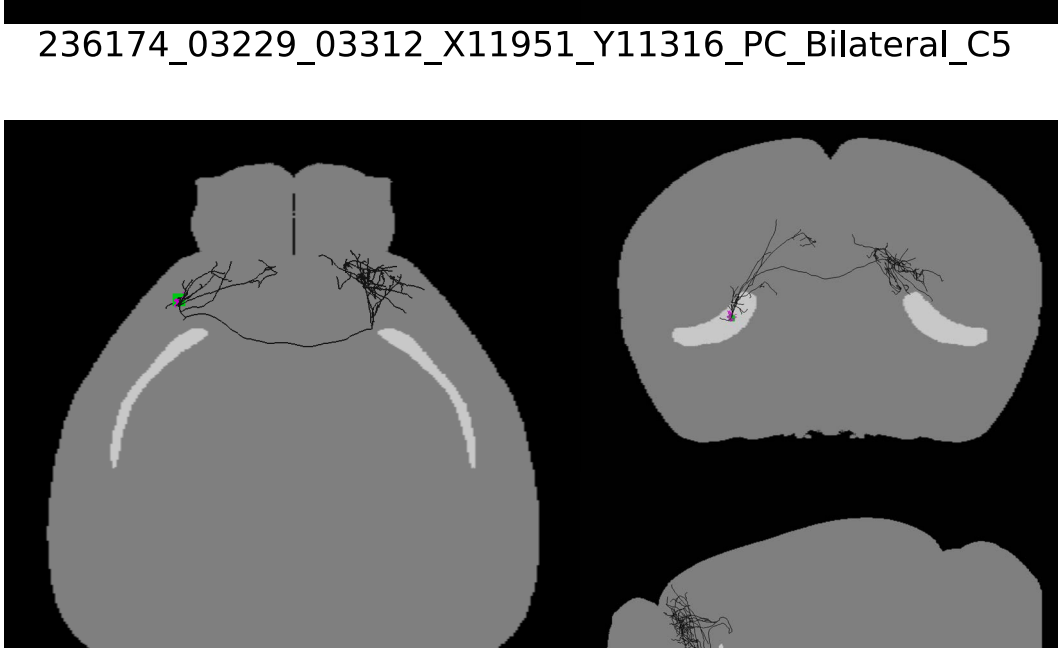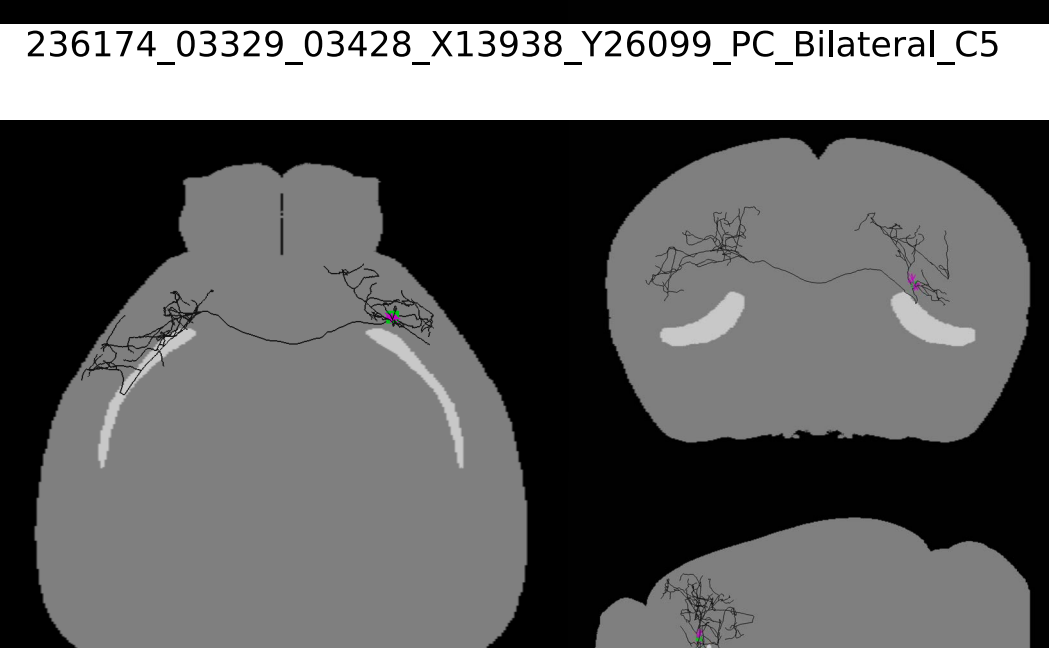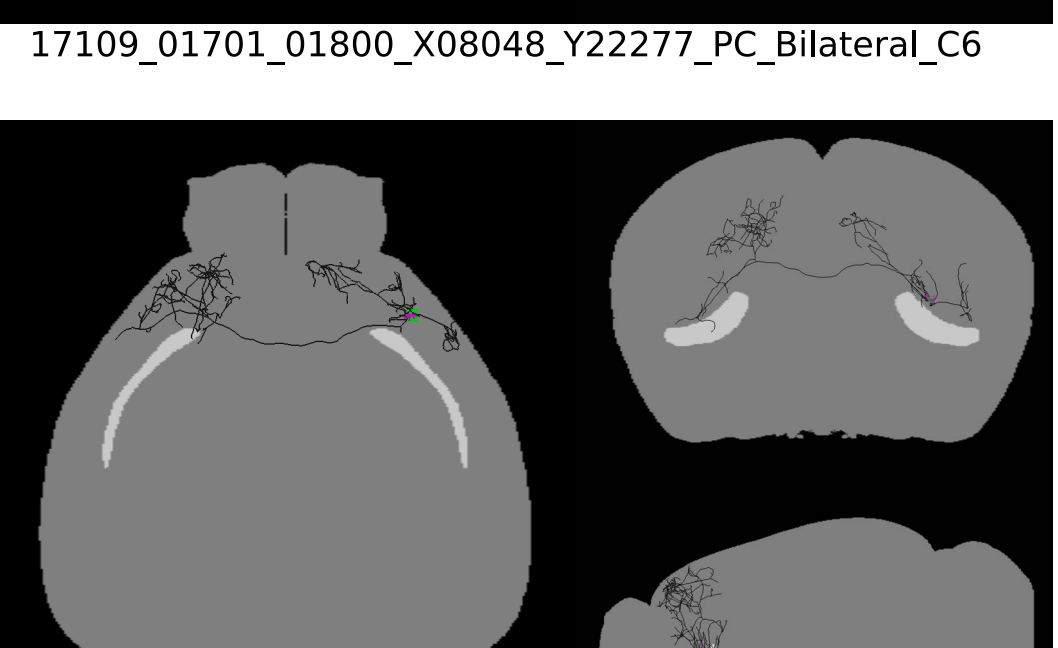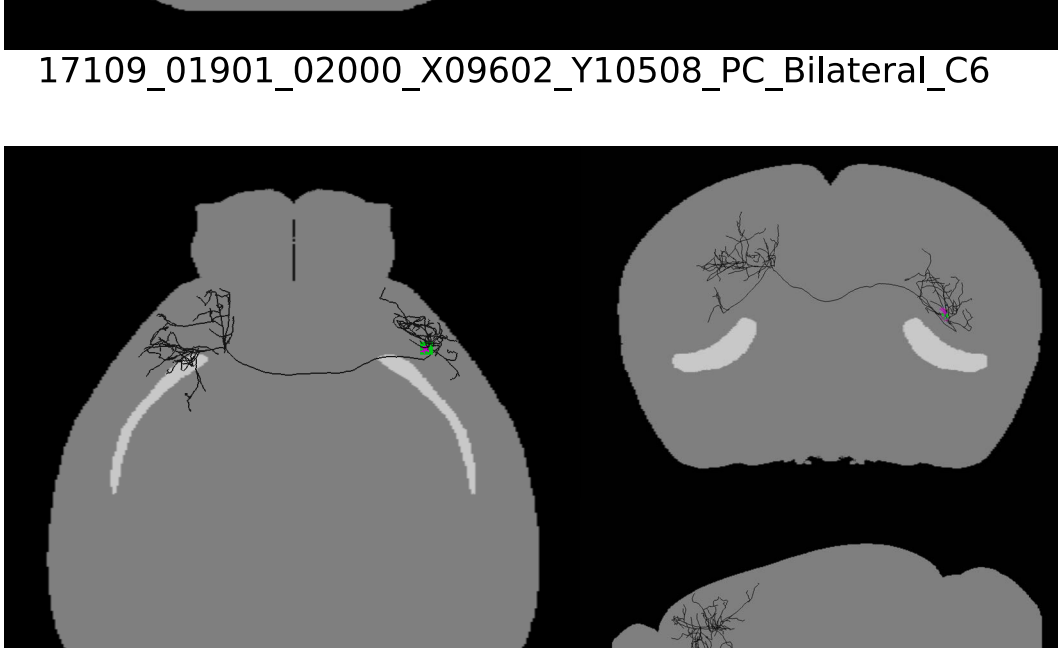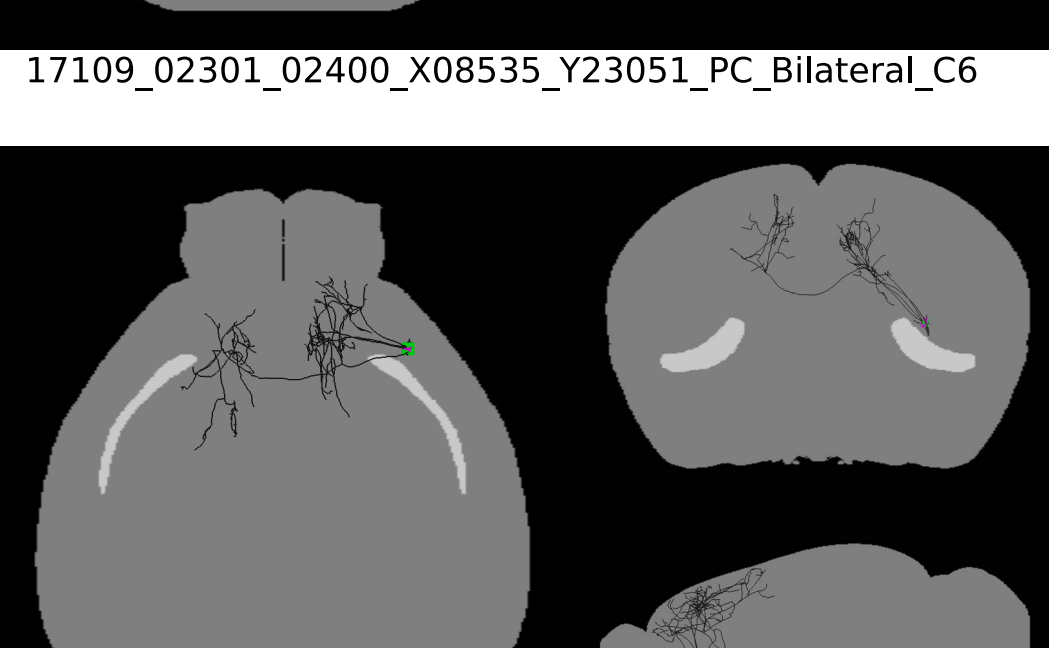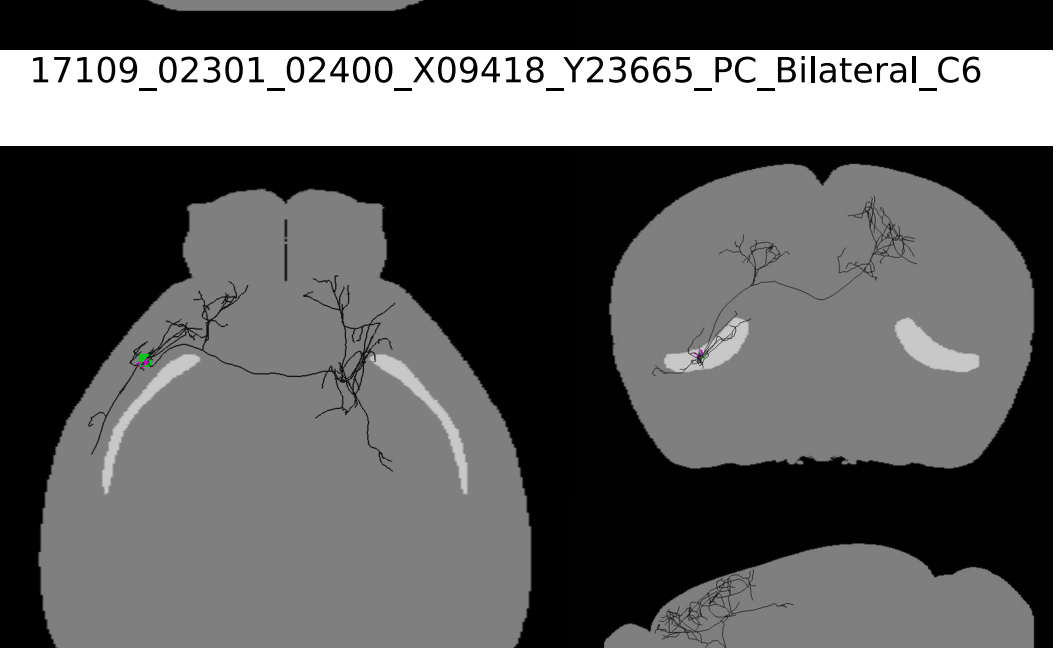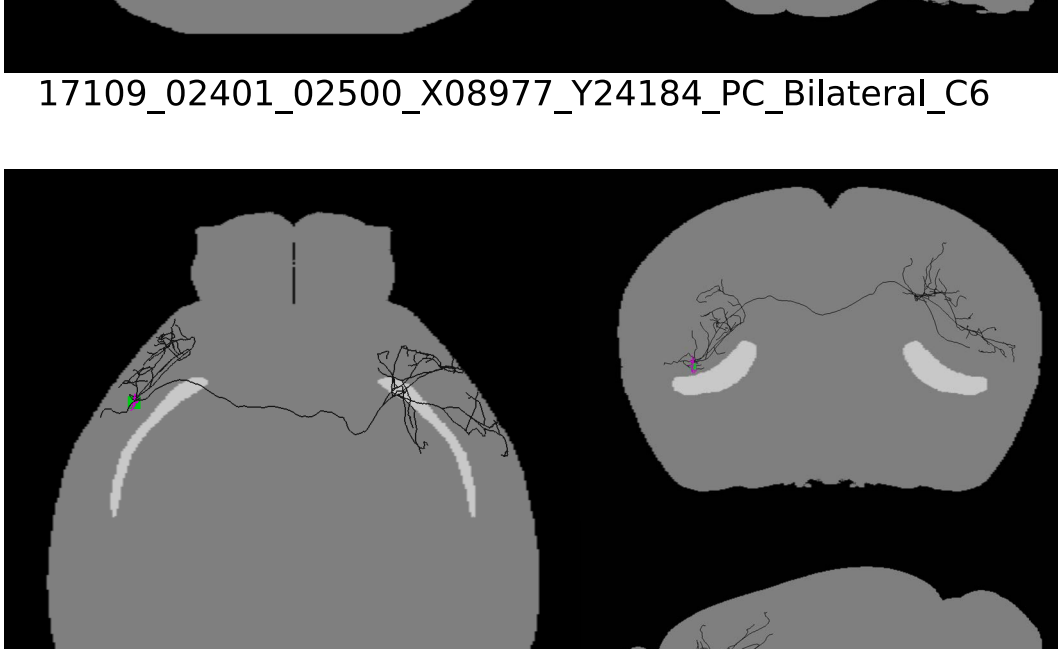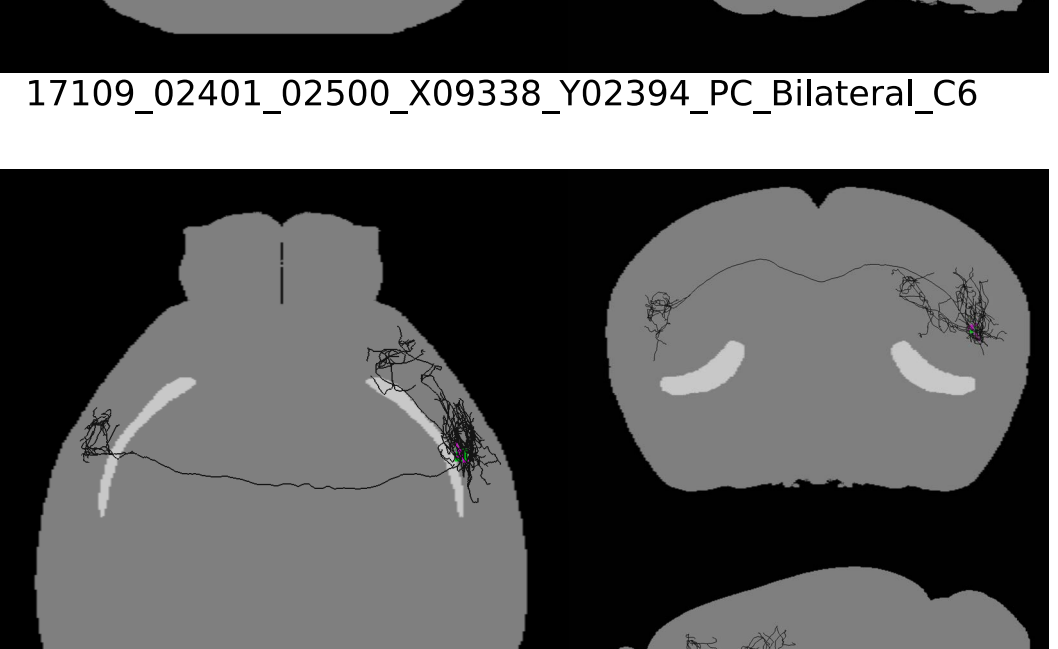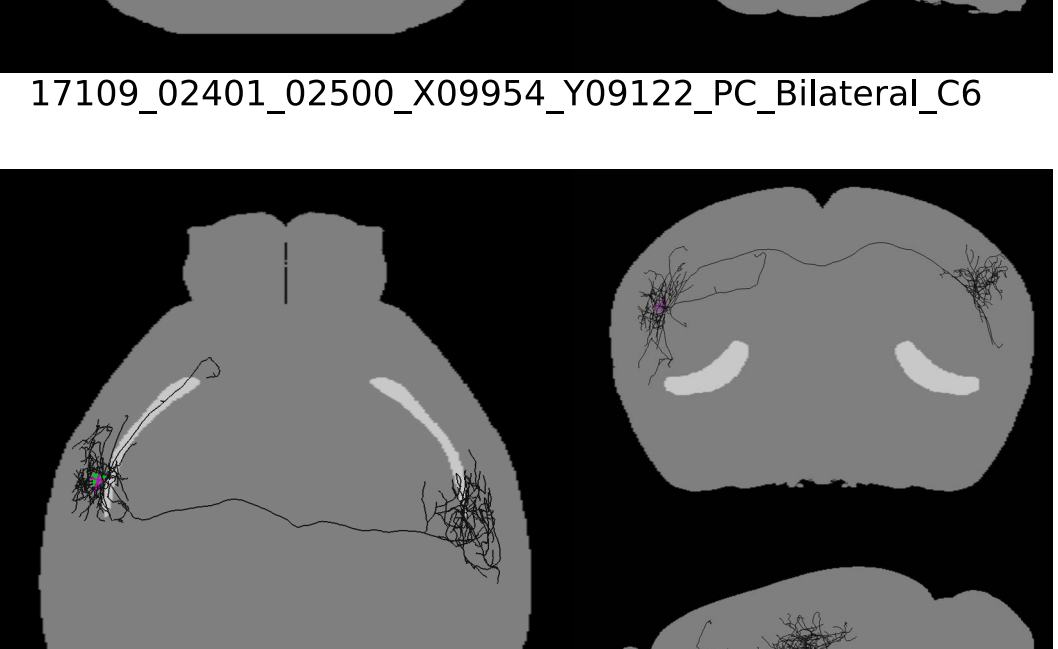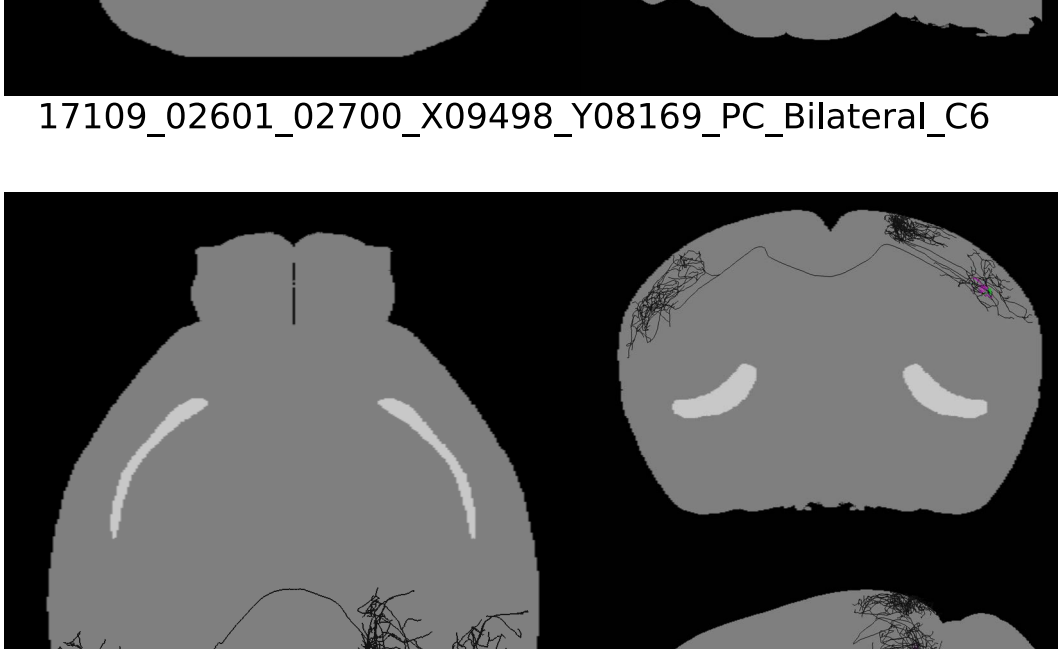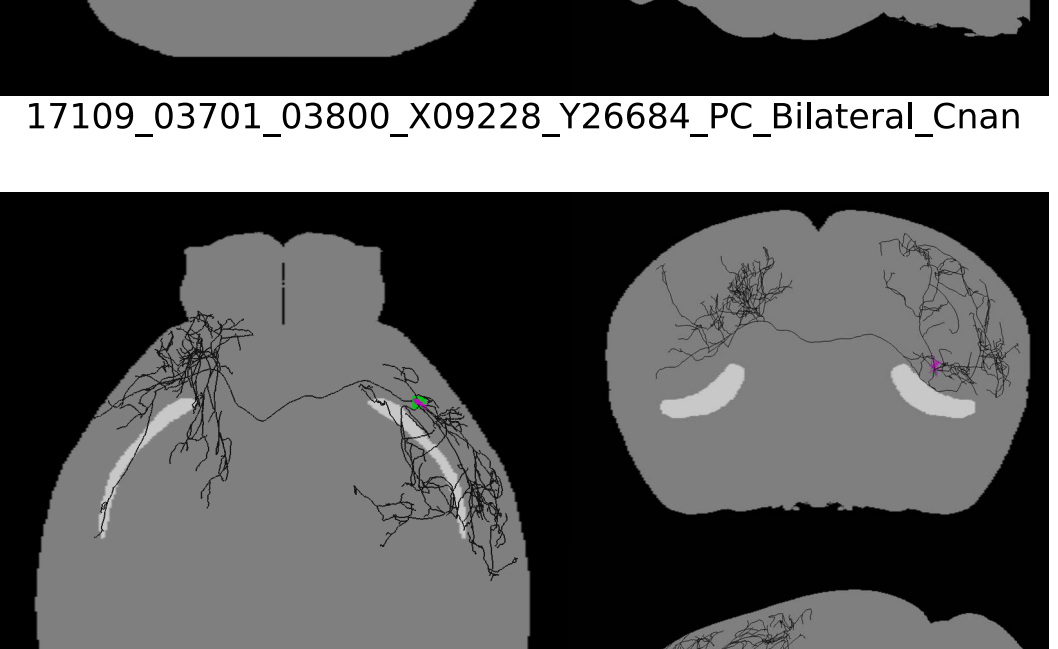

## PC\_ipsilateral

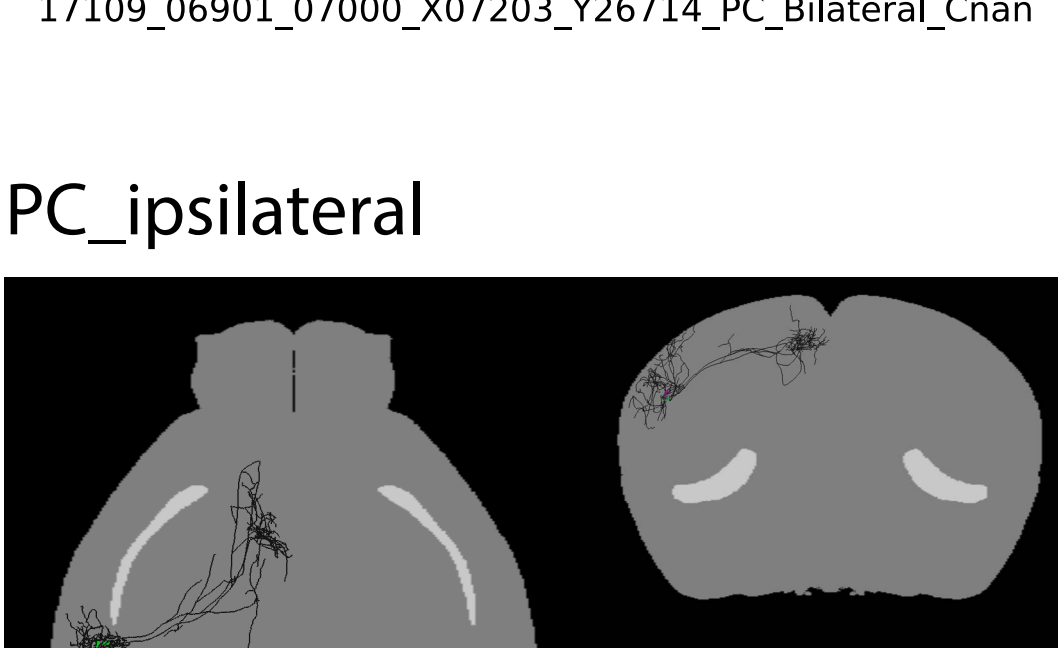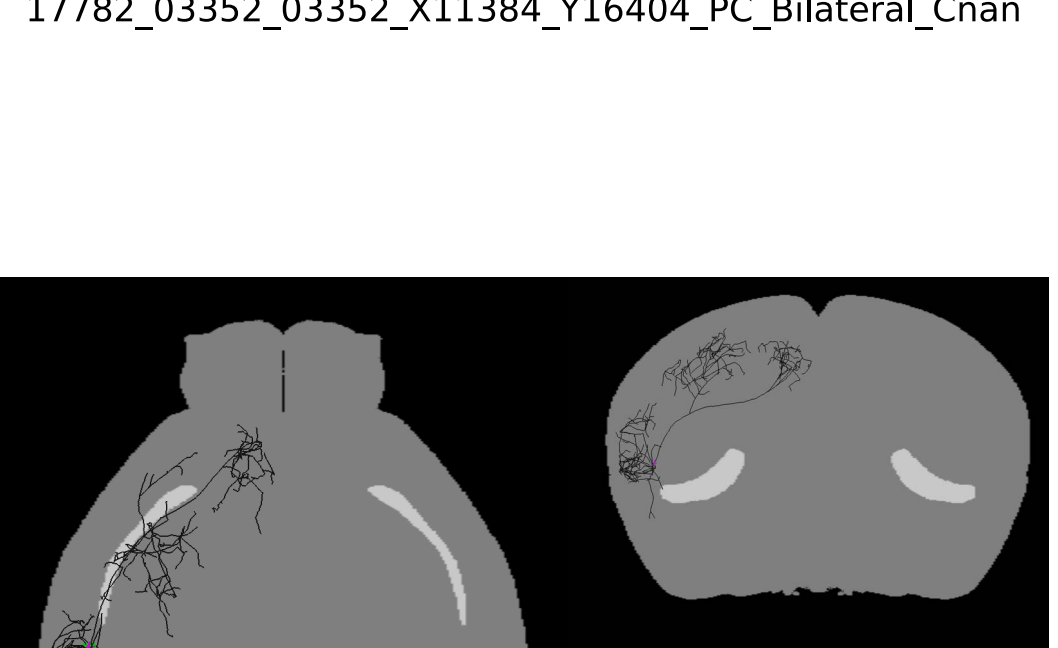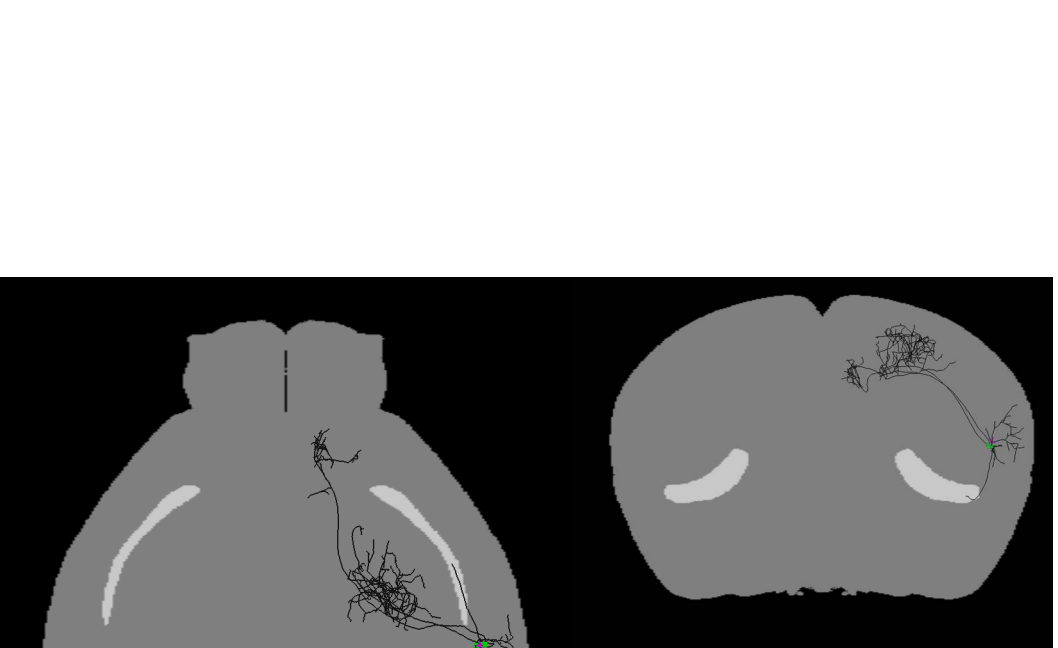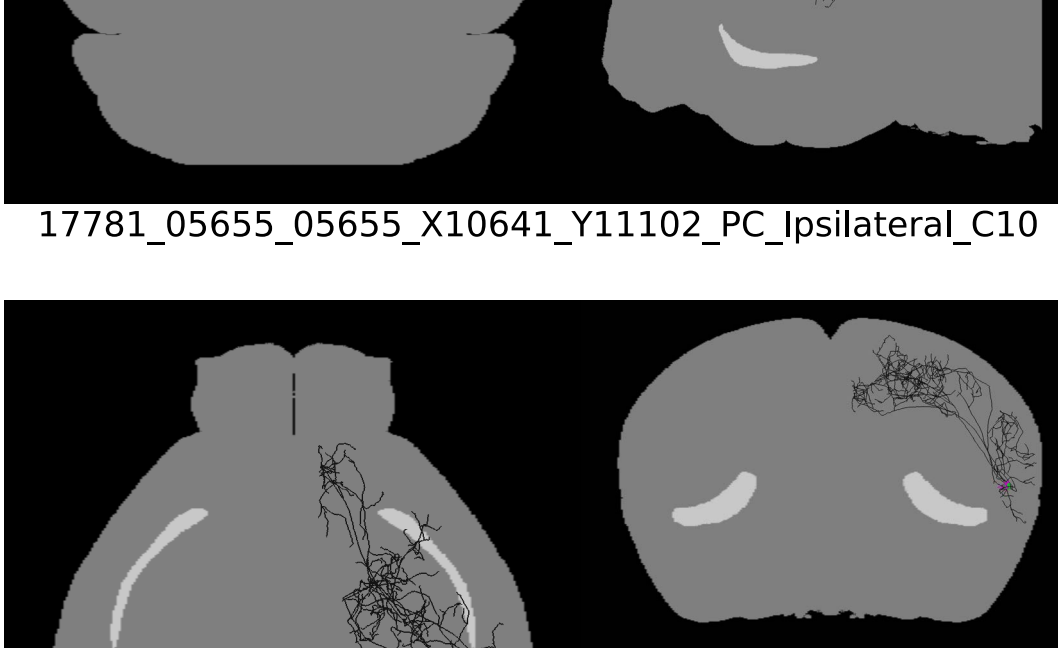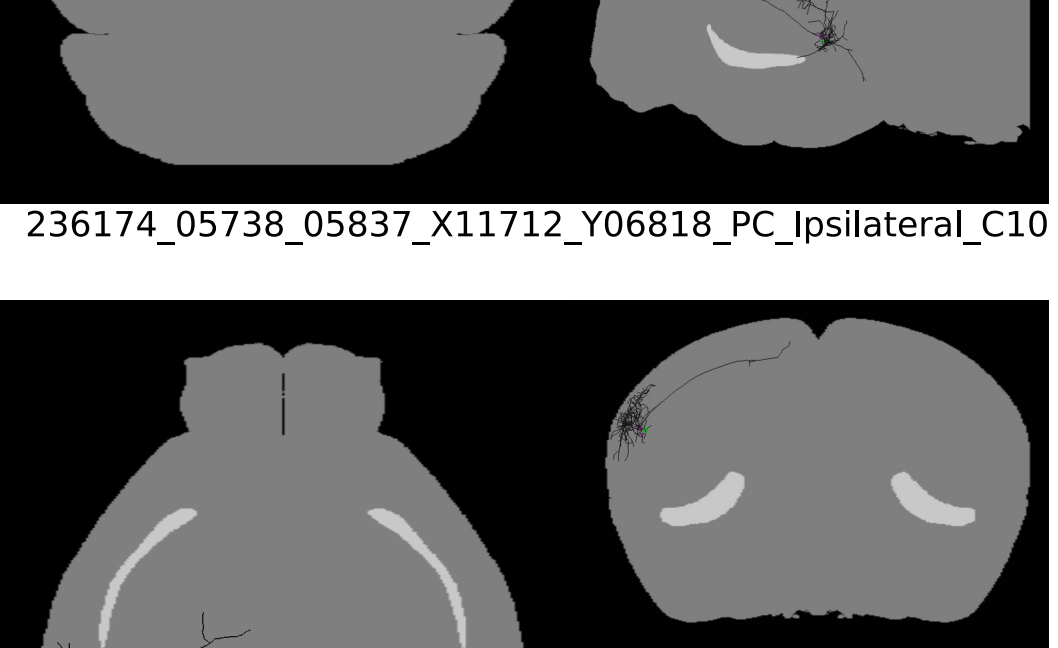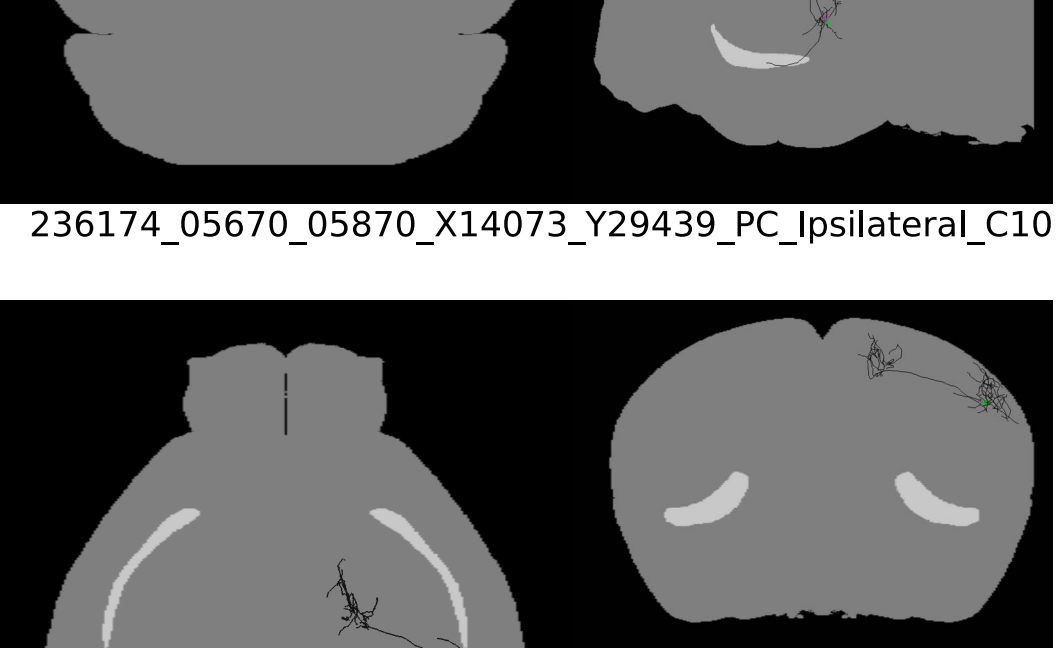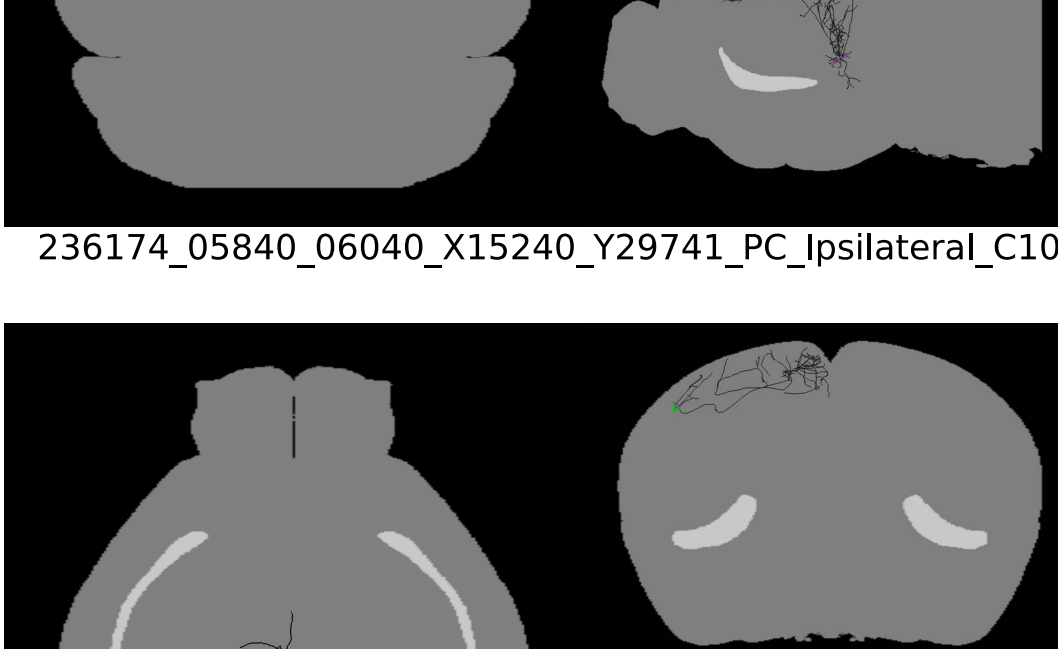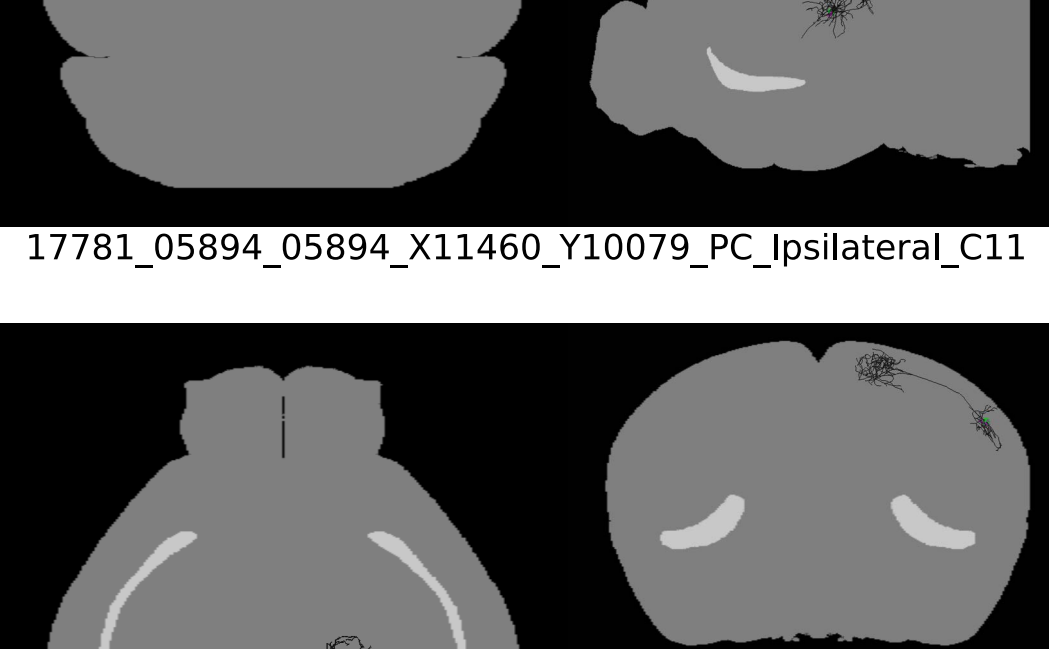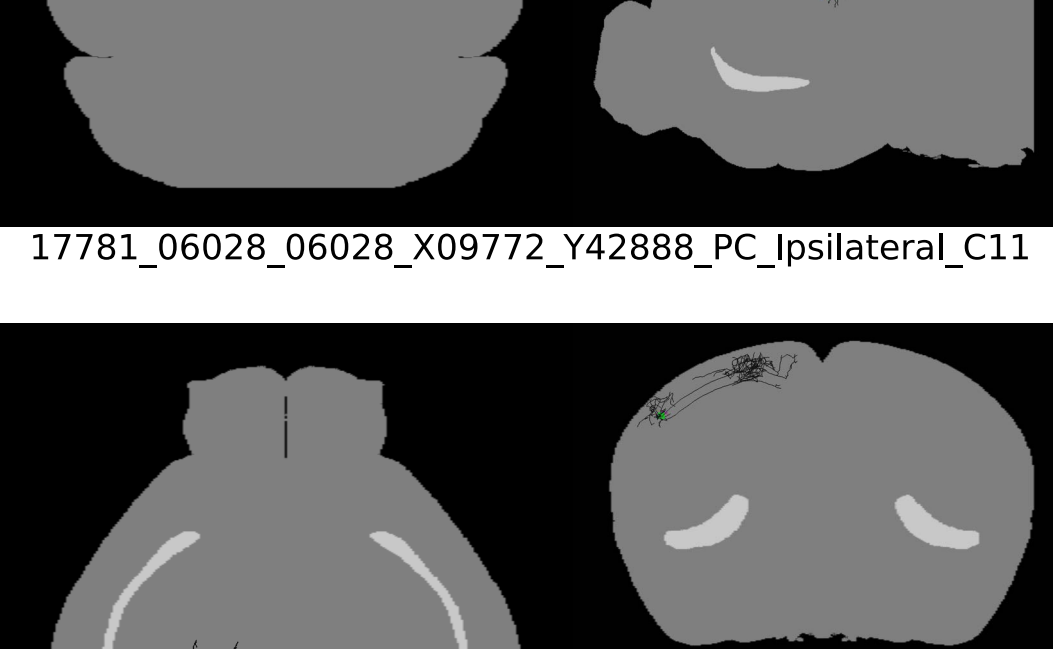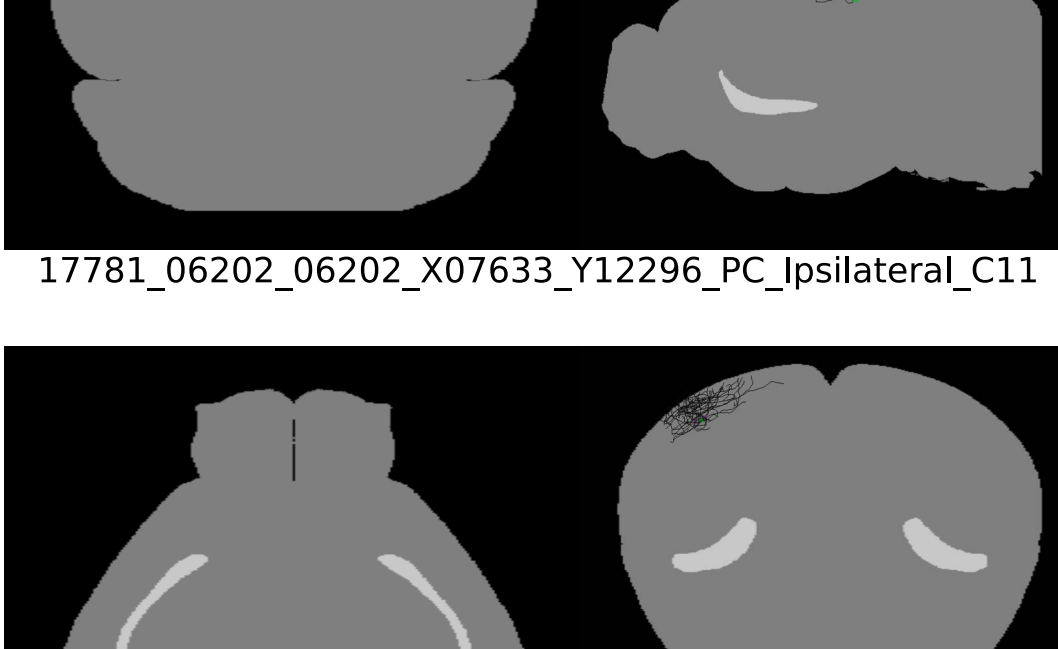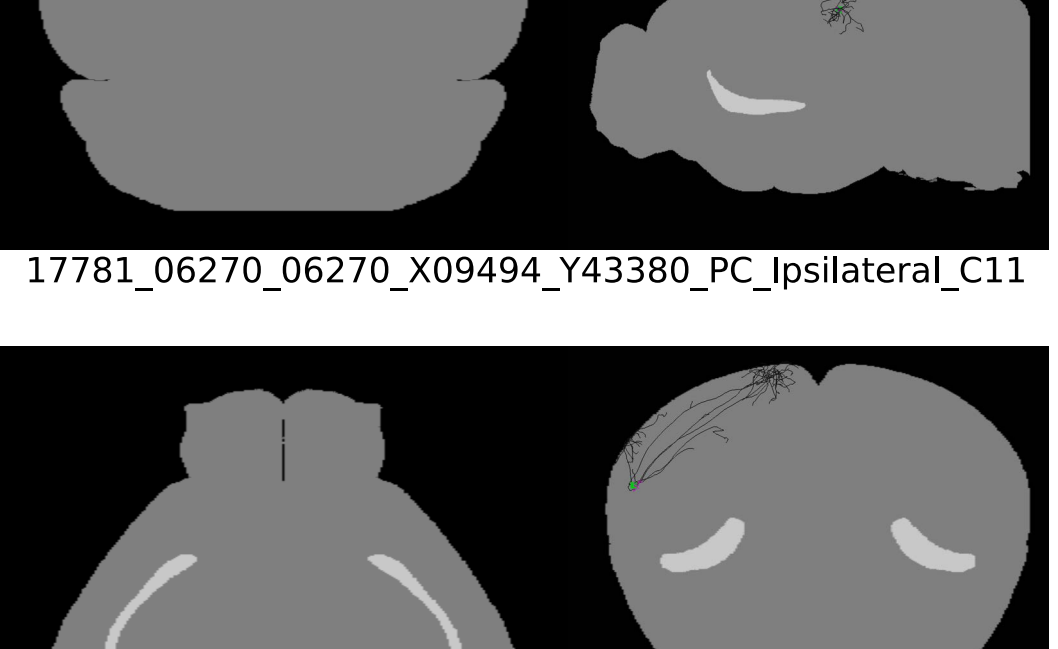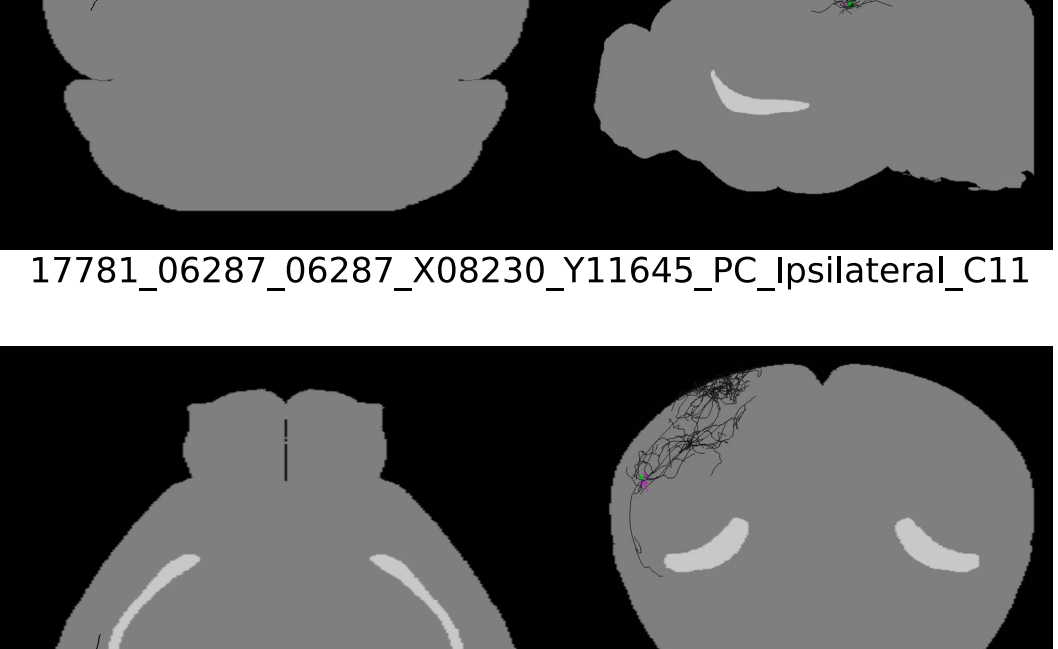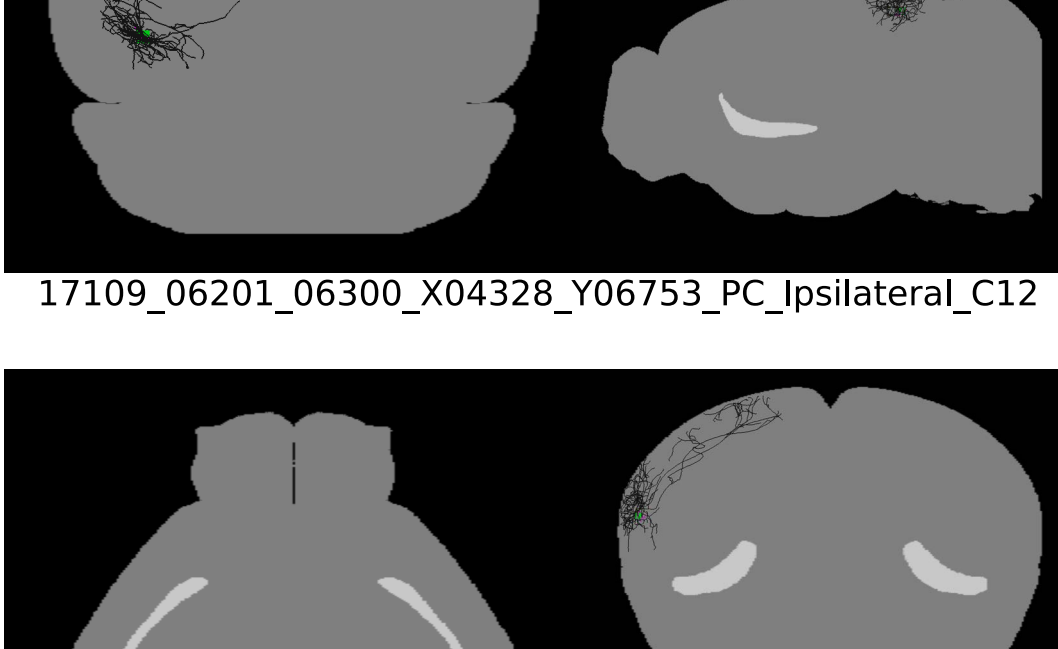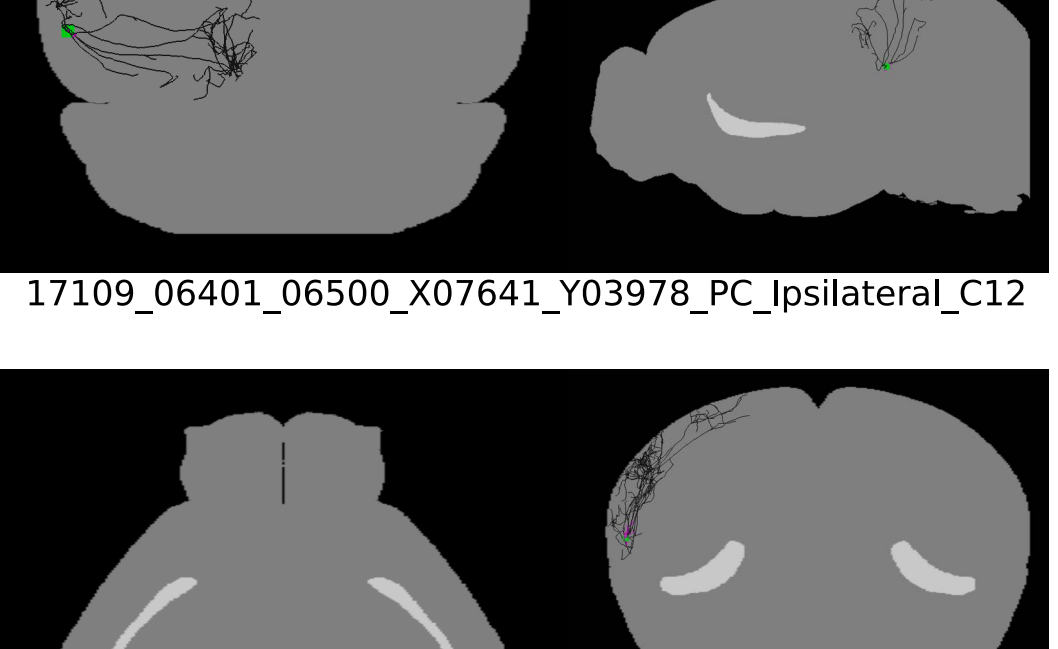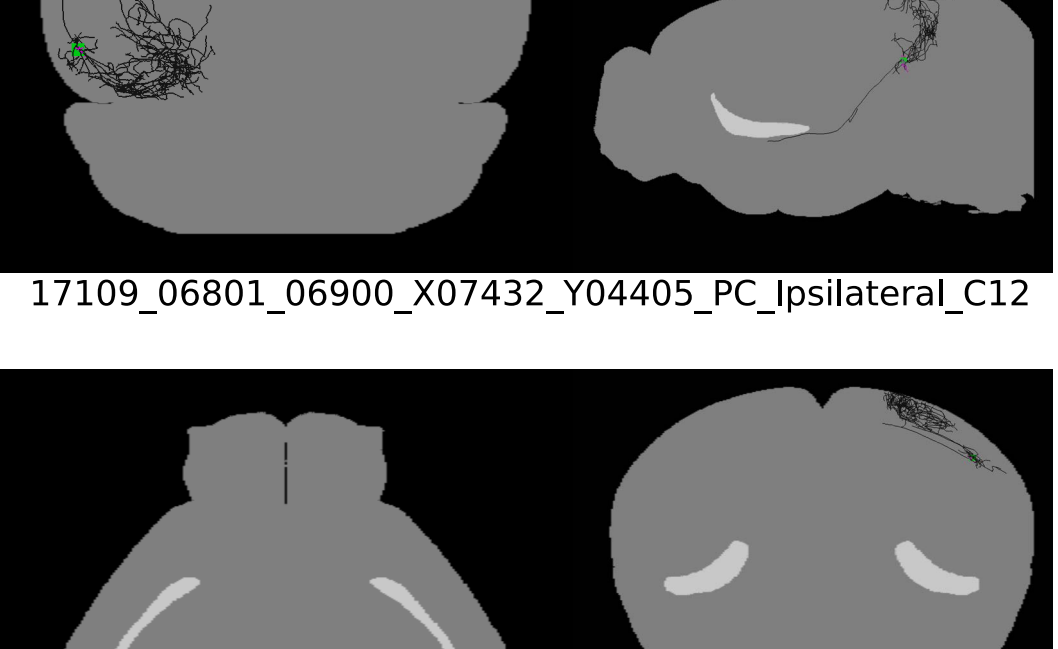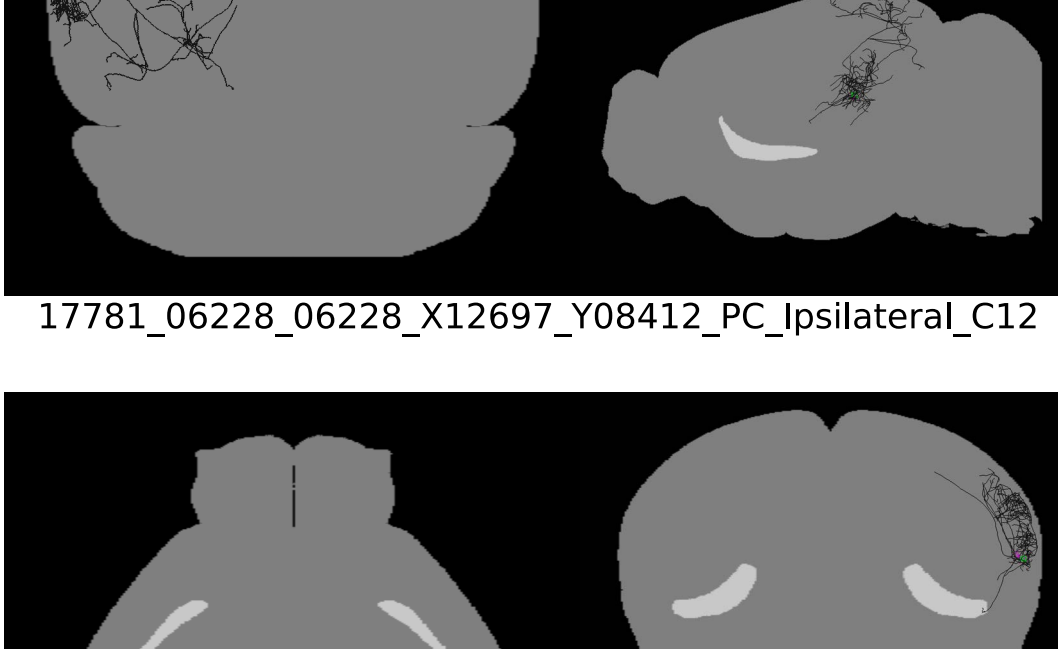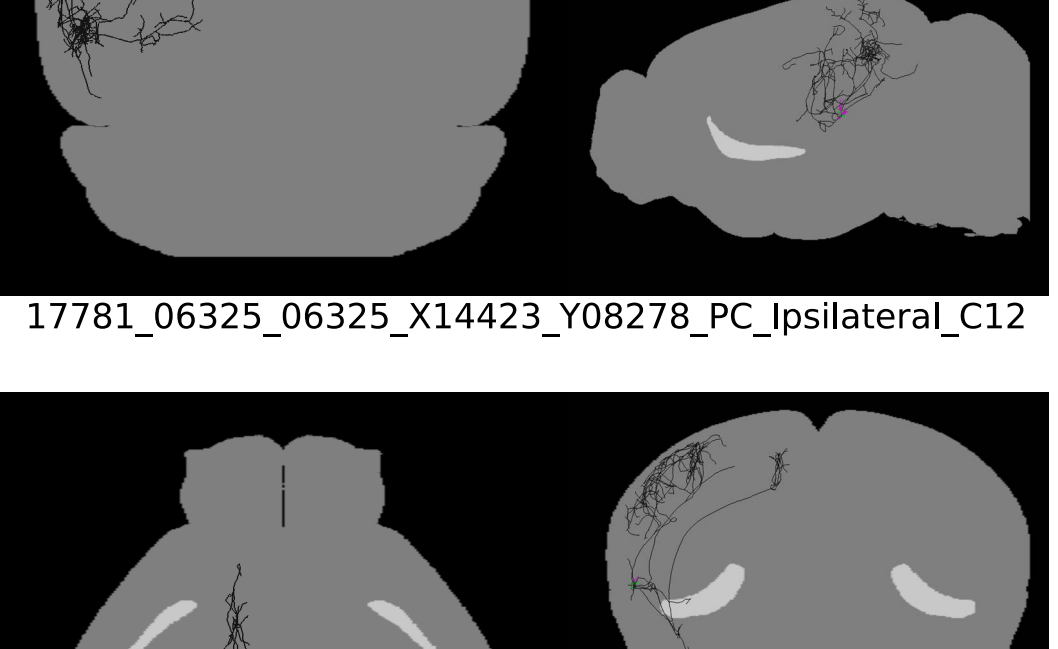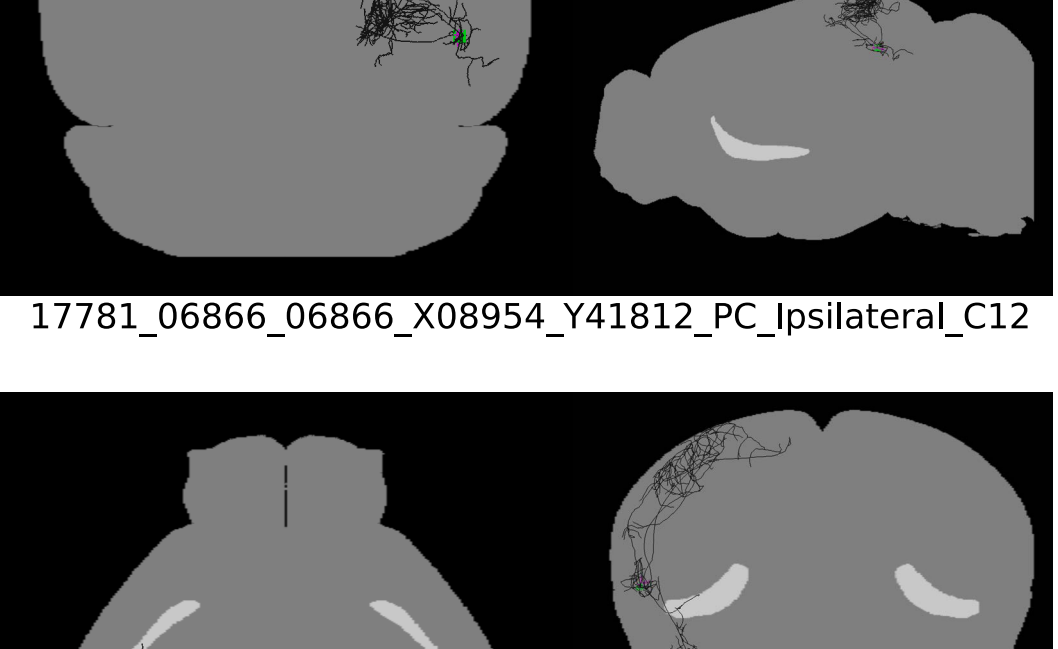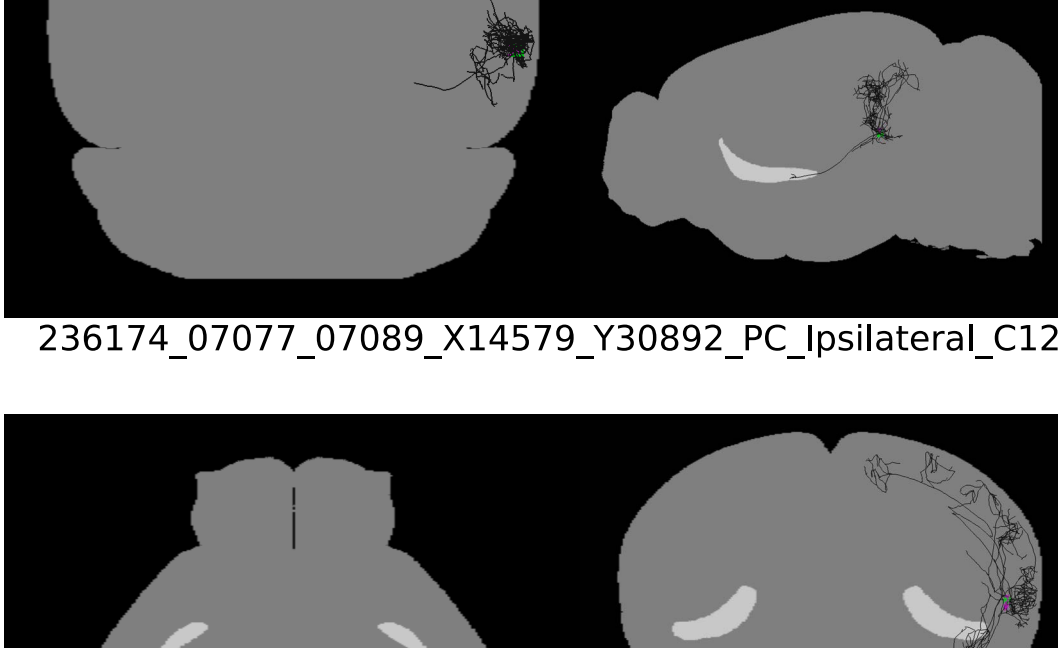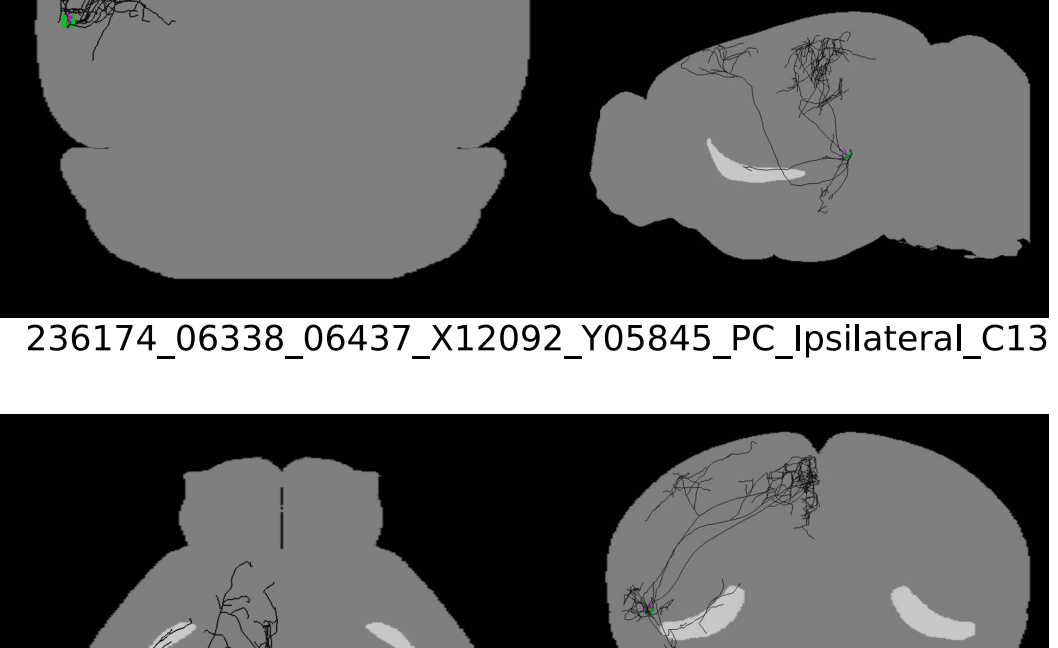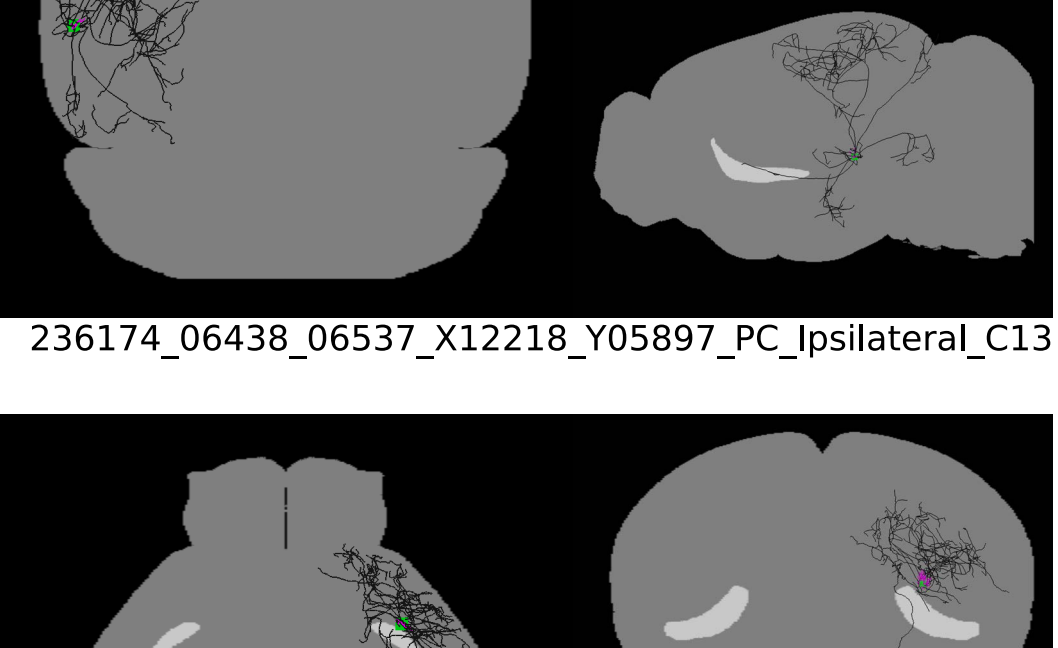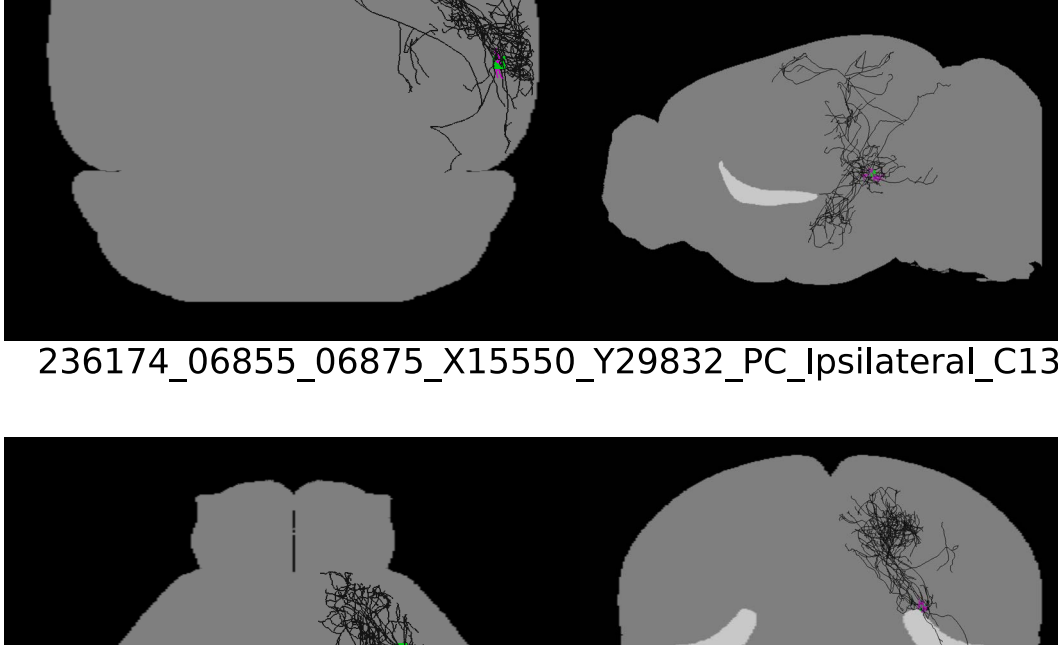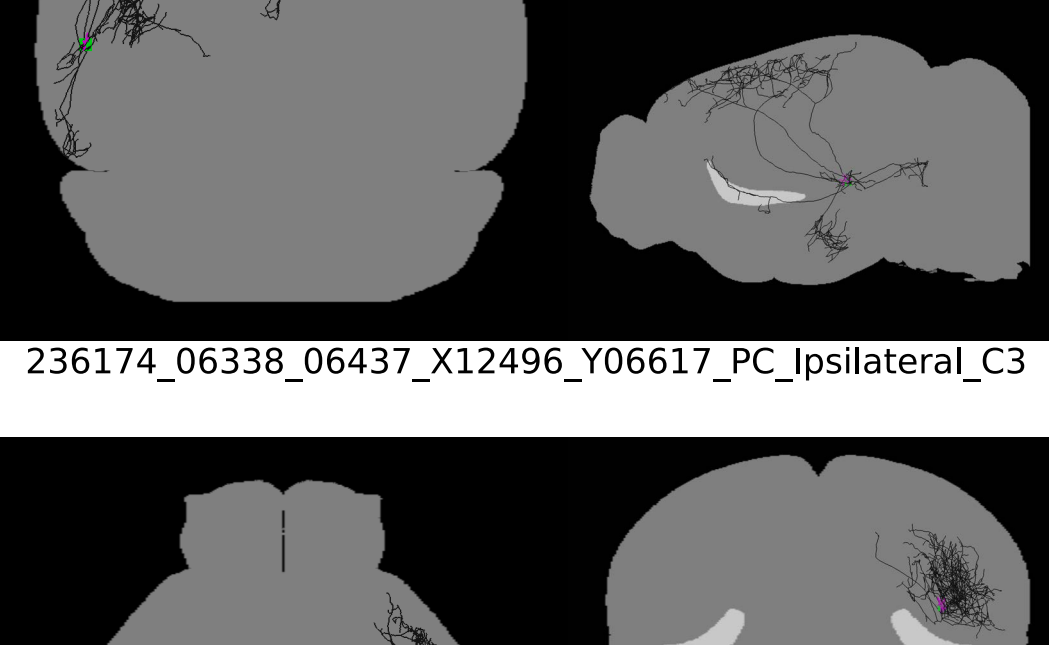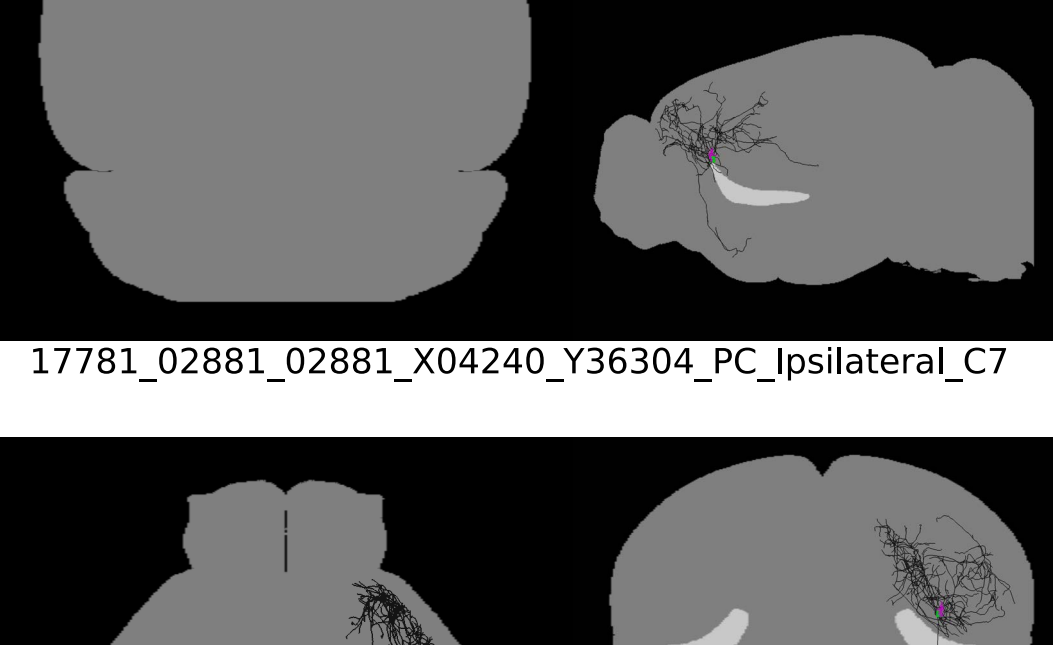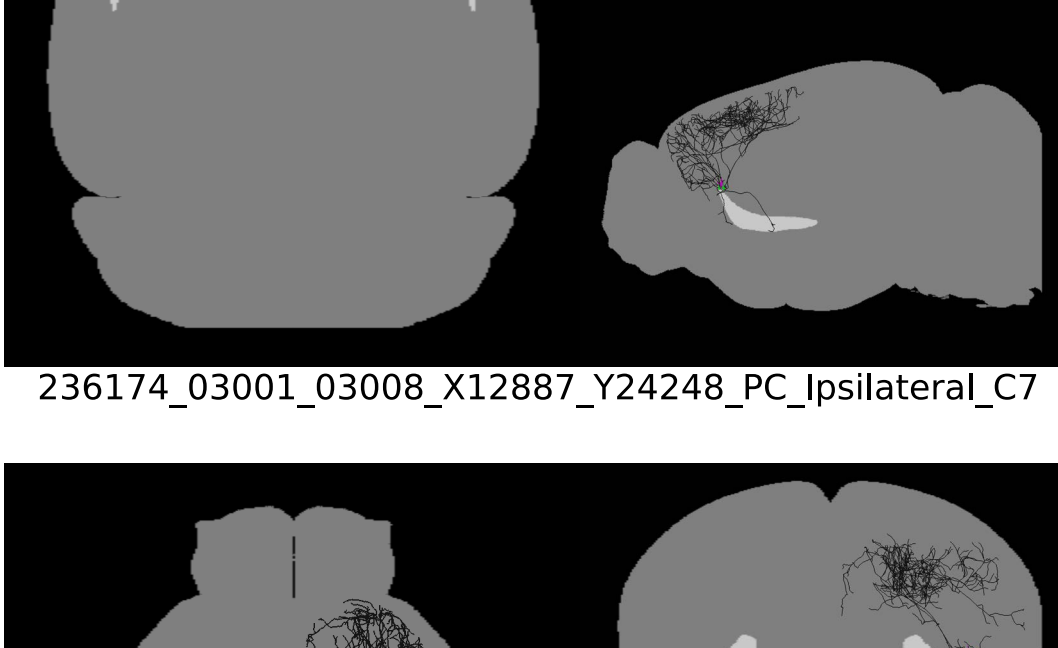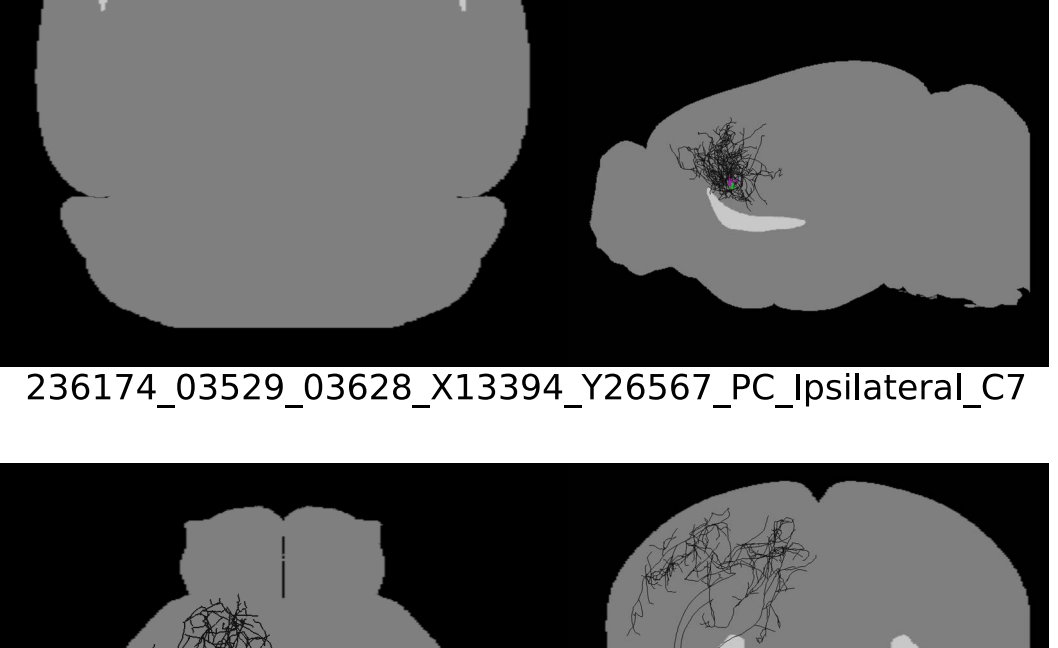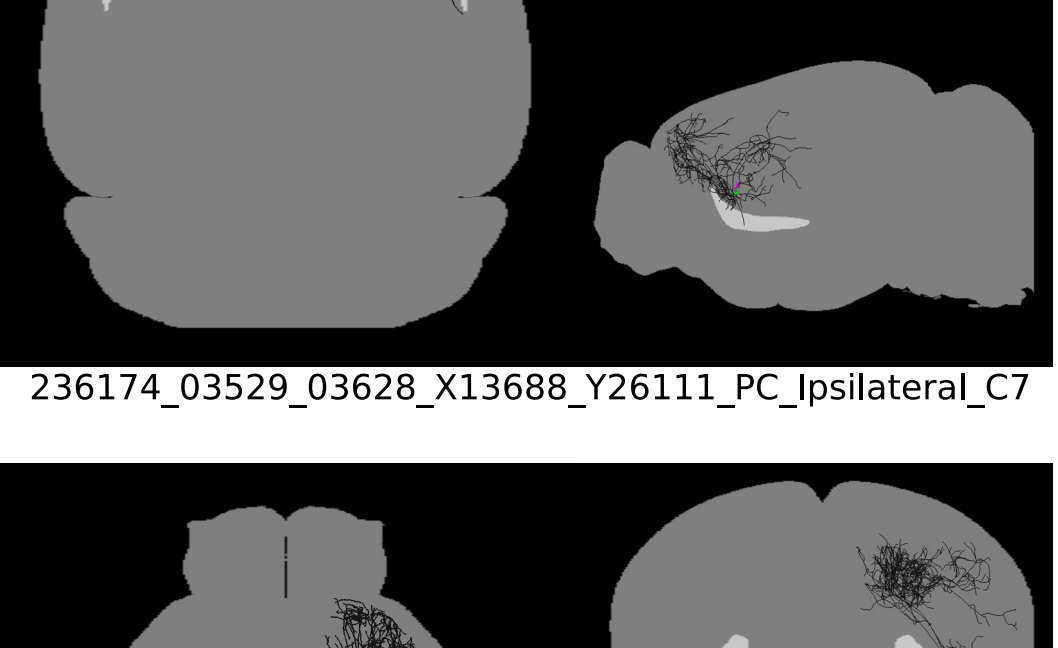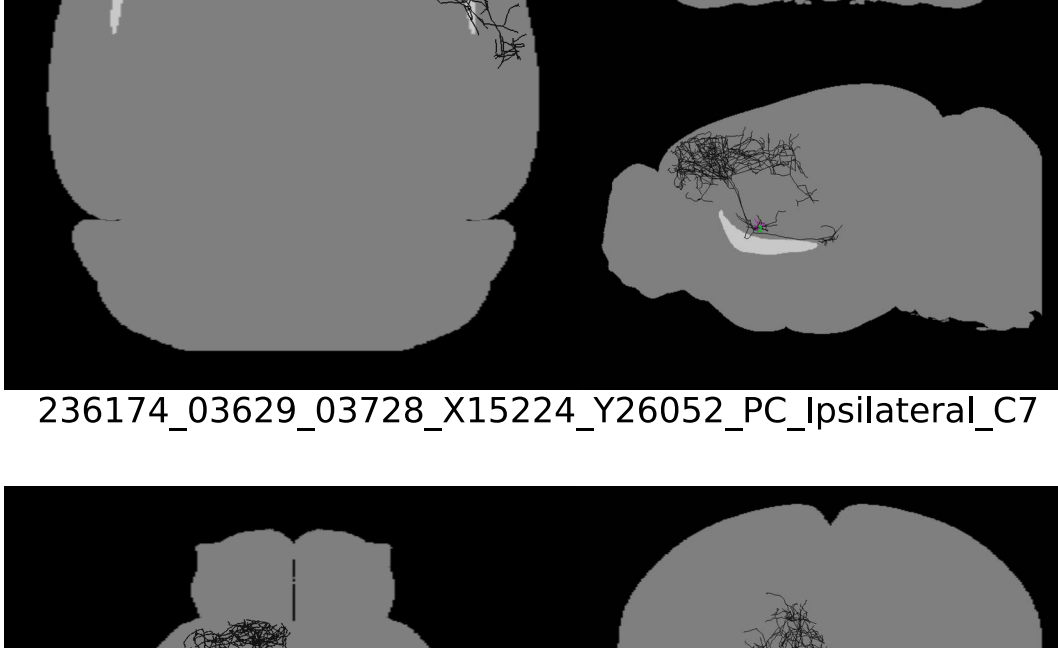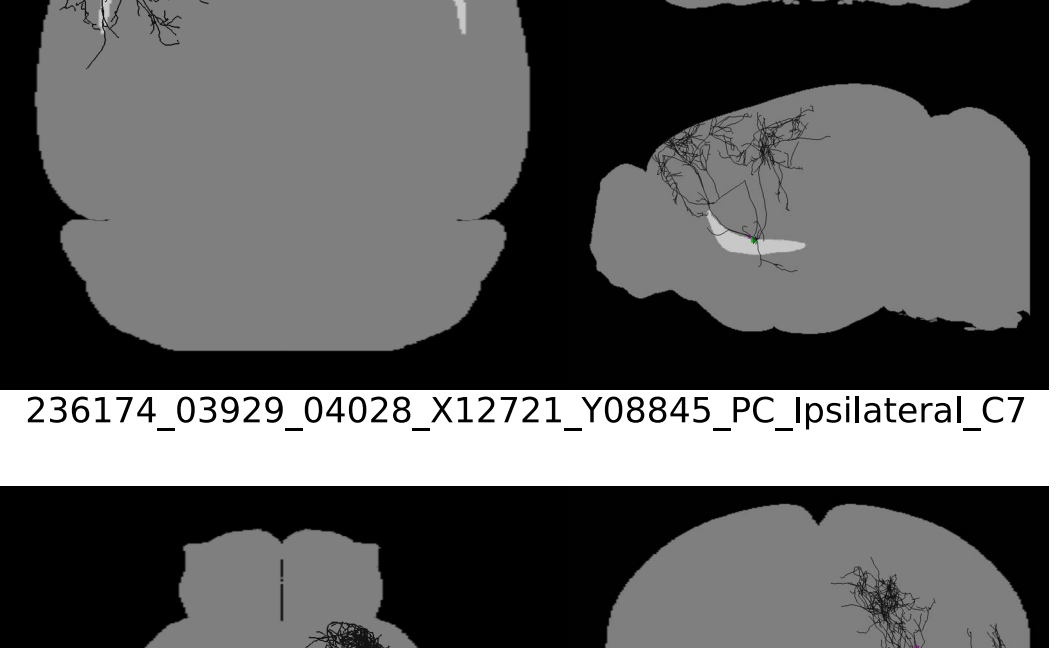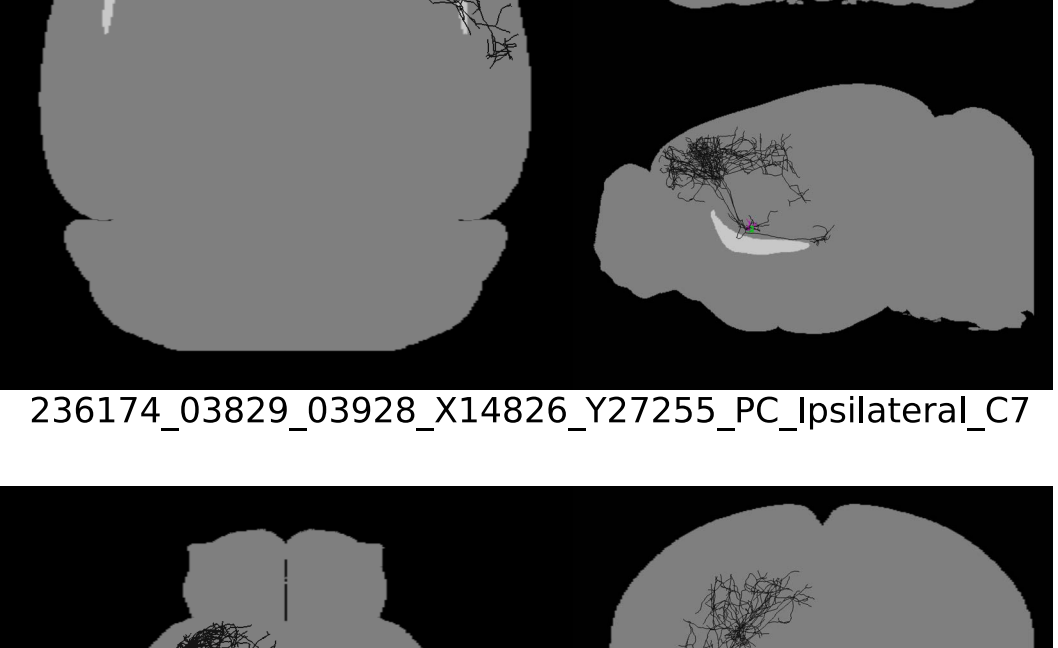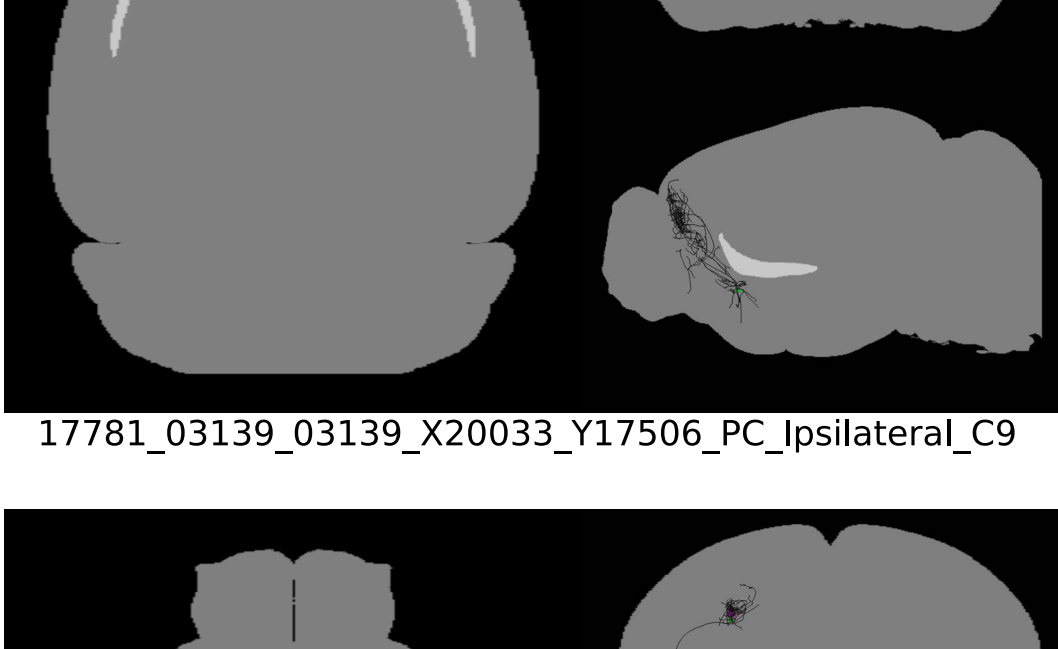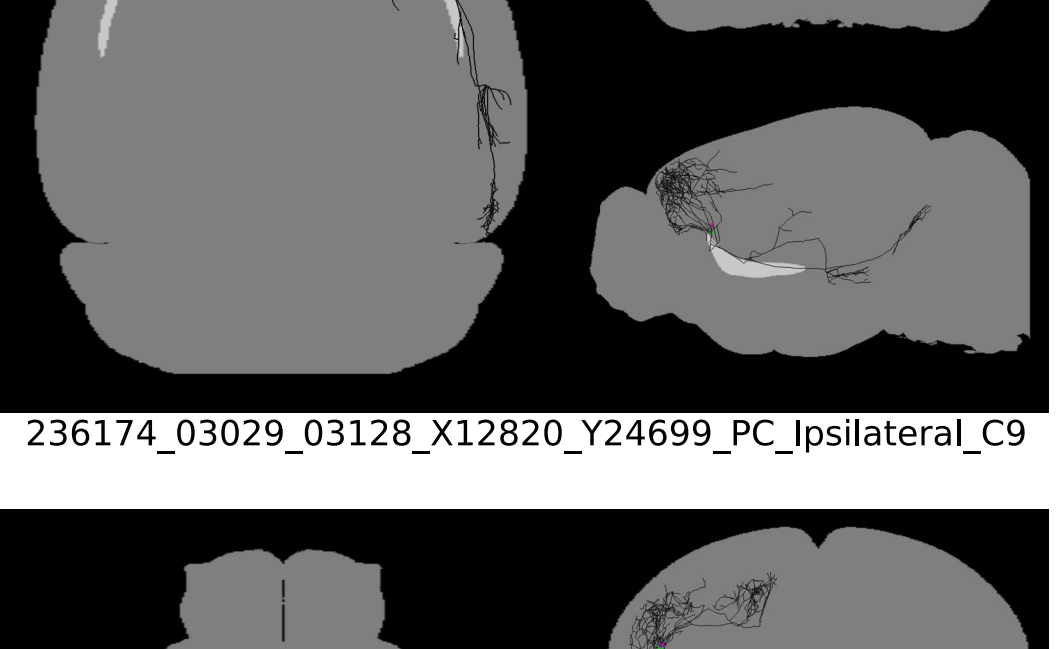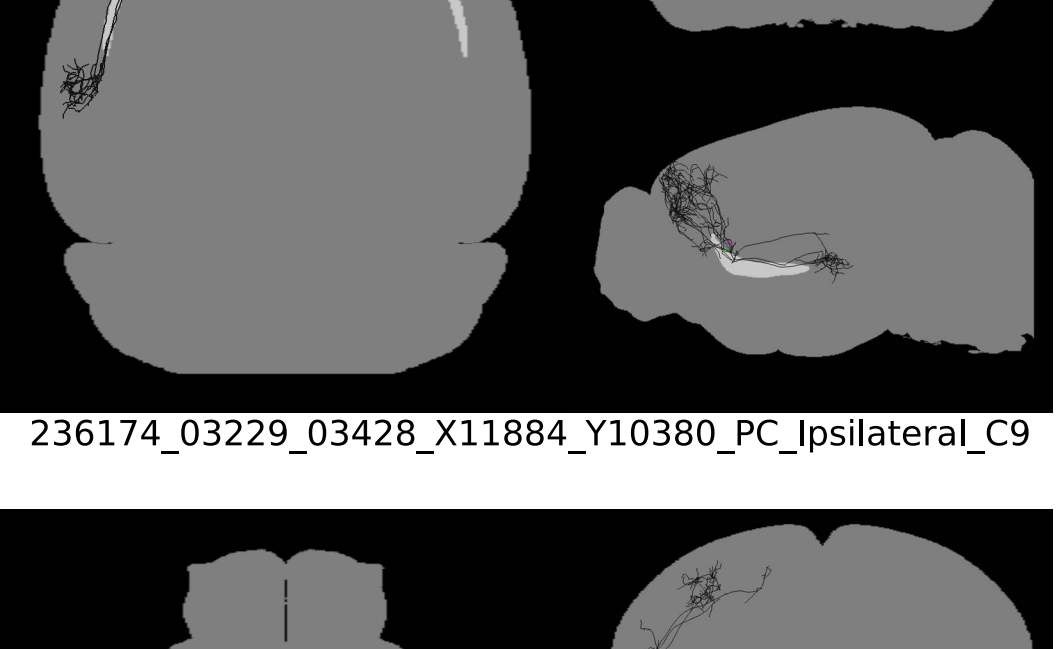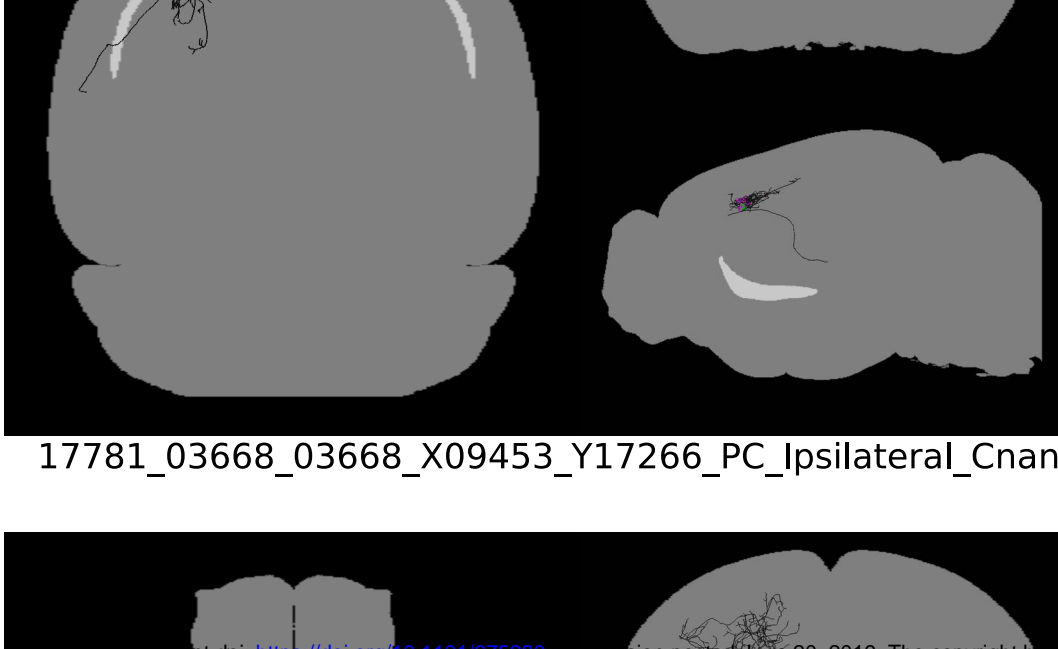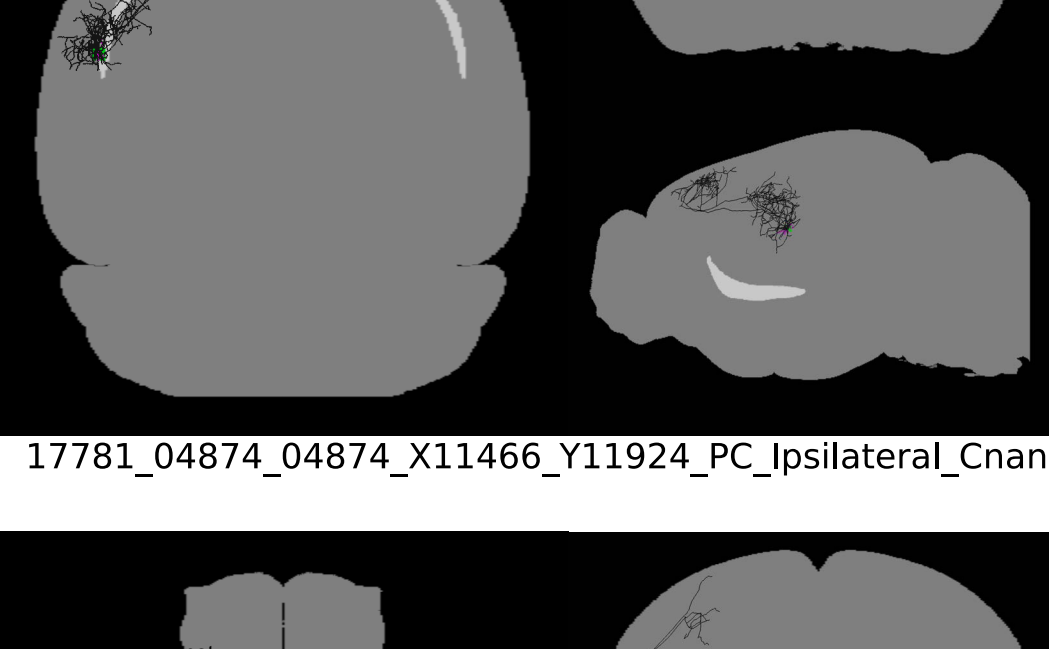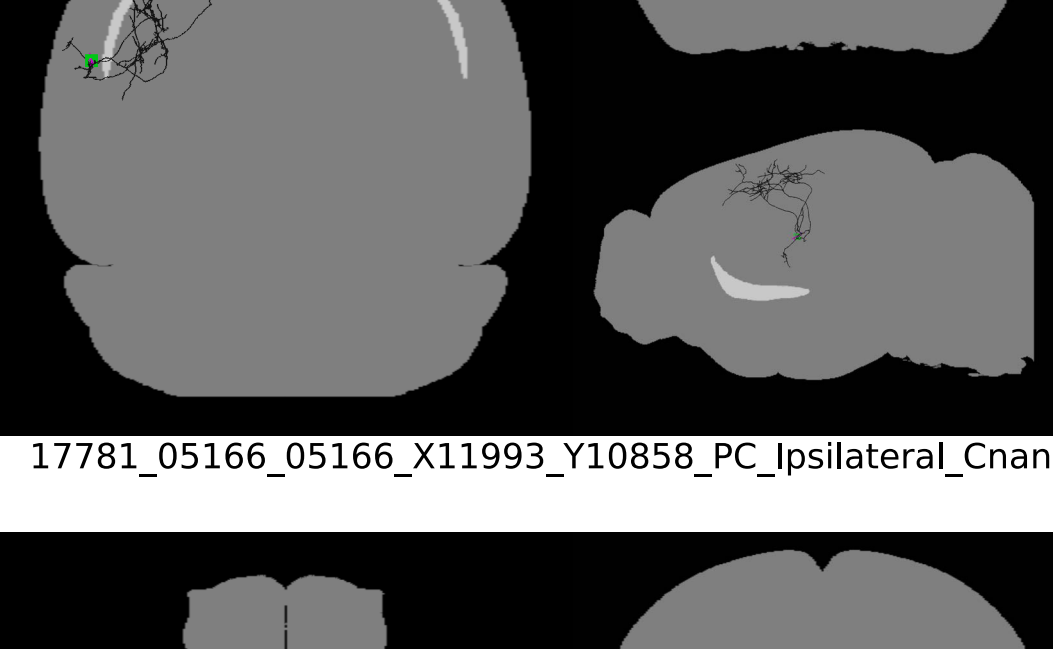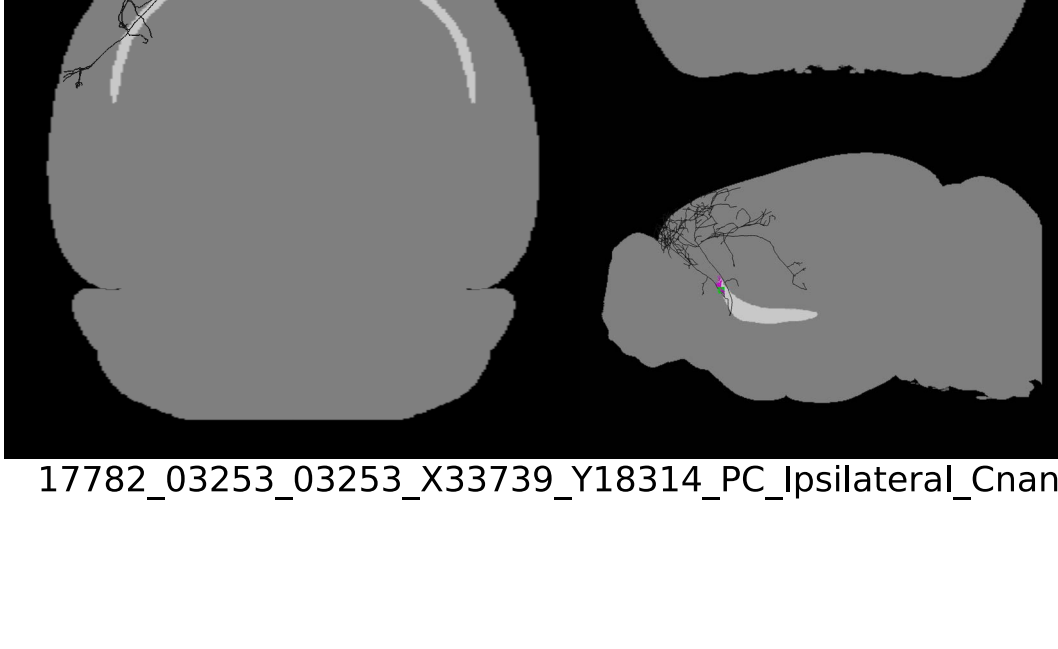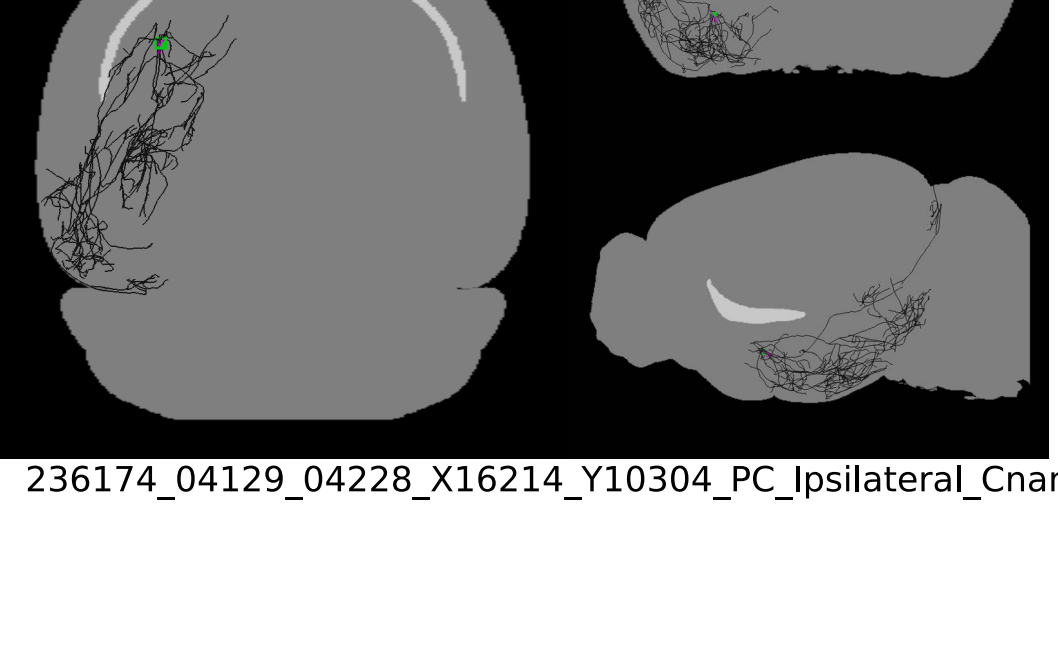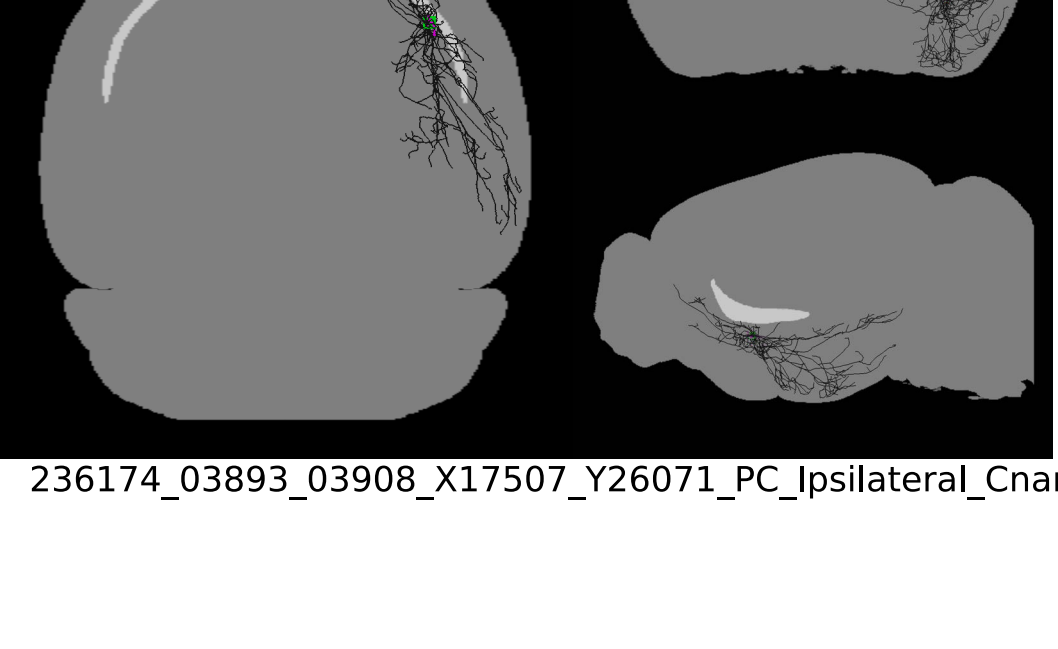

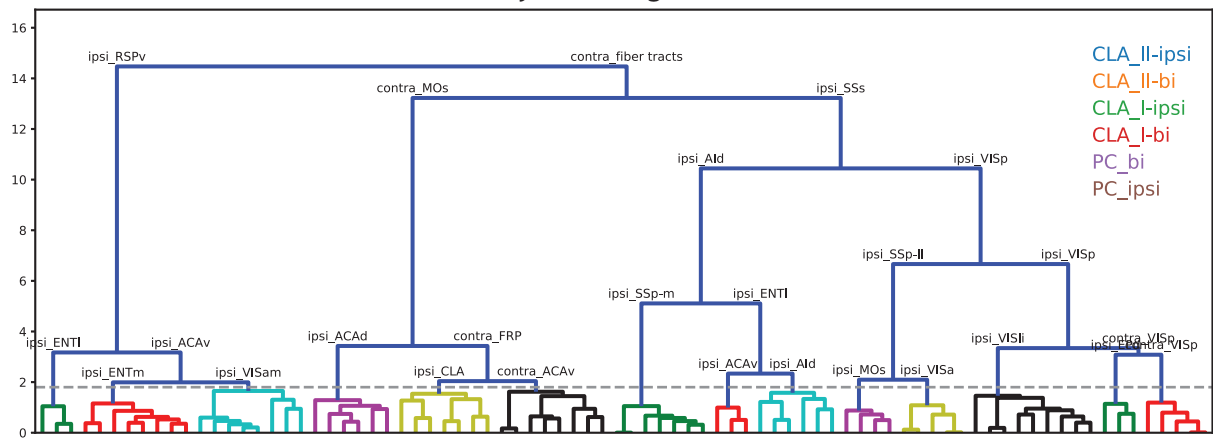

Soma coordinates

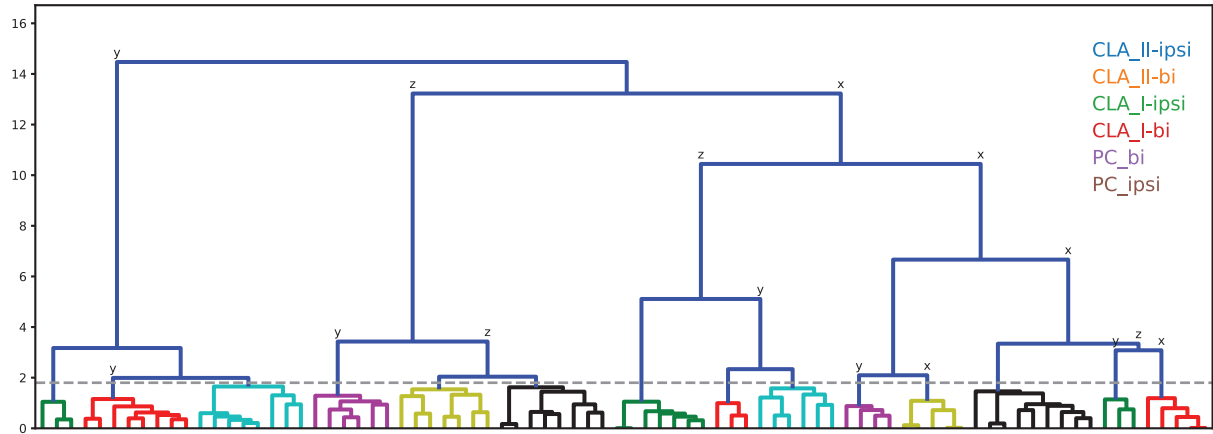

Axon morphological features

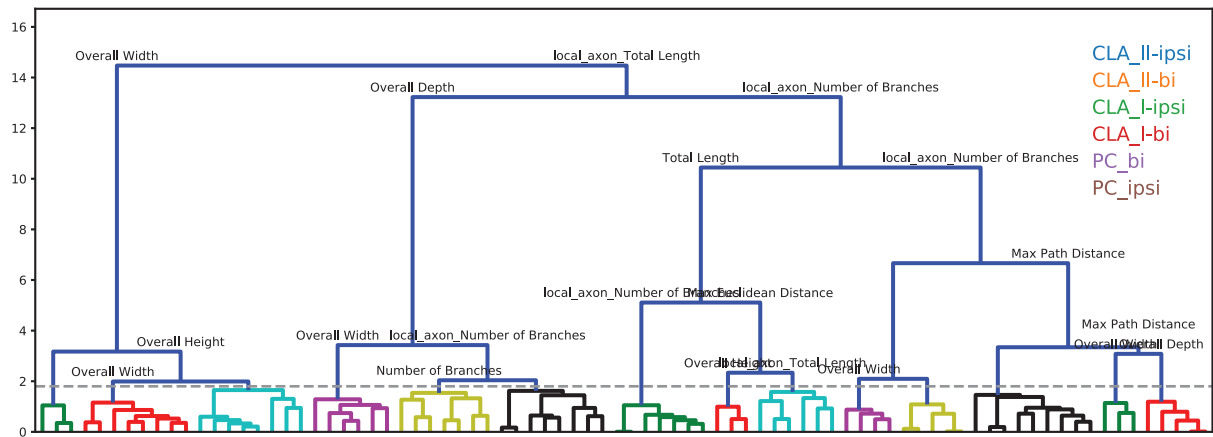

Dendrite morphological features

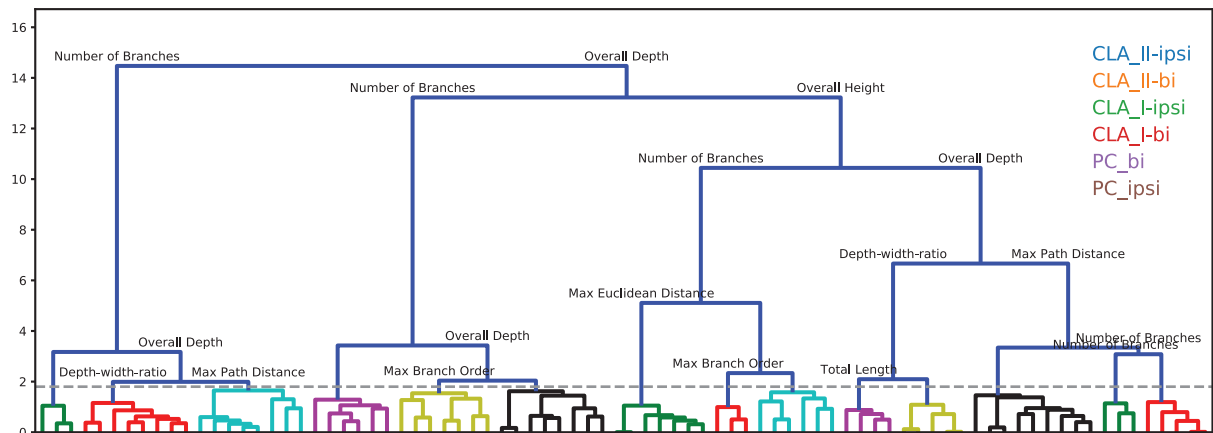



Figure S7

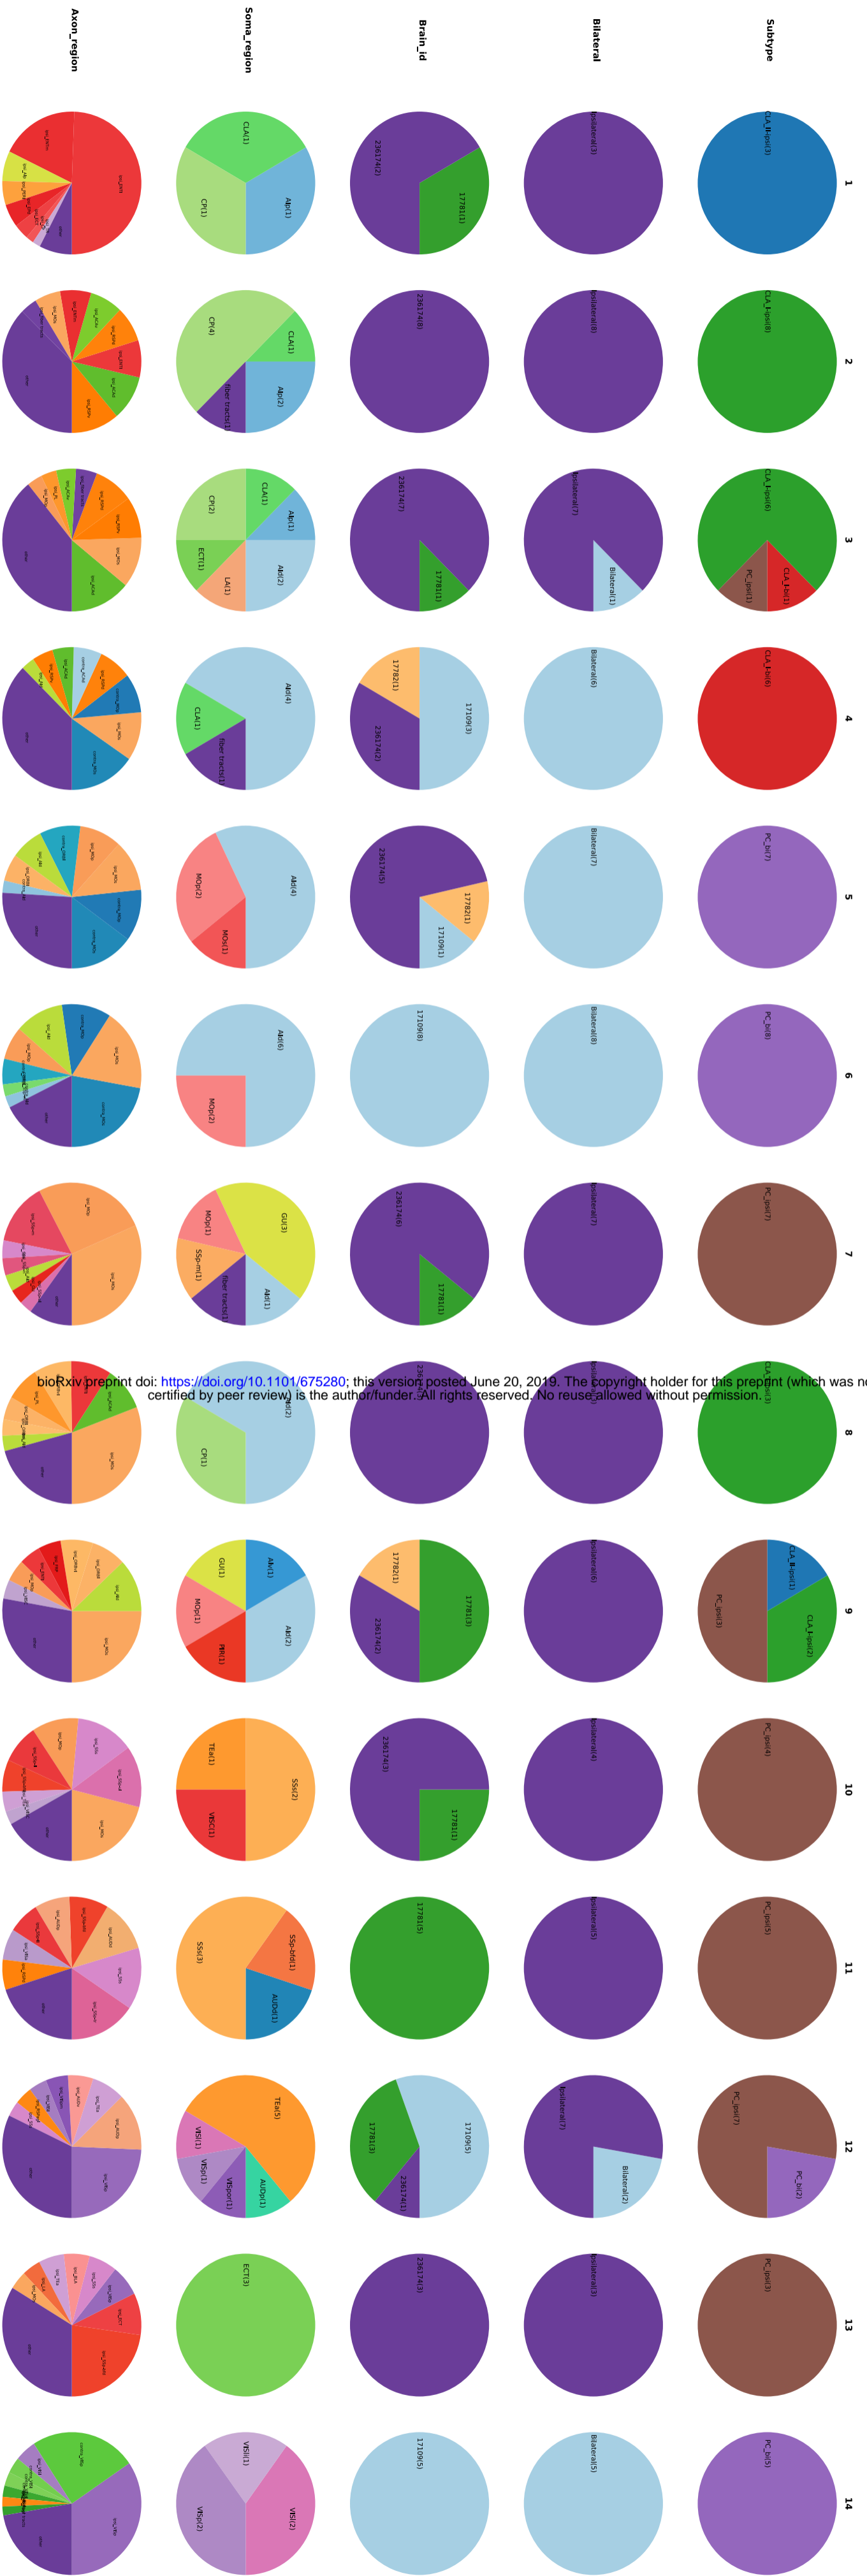

Source: https://biorxiv.org/content/biorxiv/early/2019/06/20/675280.full-text.pdf
